# Supplementary material for: Insights from lncRNAs Profiling of MIN6 Beta Cells Undergoing Inflammation
Source: Mediators Inflamm. 2016 Sep 6;2016:9275106. doi: 10.1155/2016/9275106 (PMC5028877; doi:10.1155/2016/9275106)
Supplement: Supplementary file 1 — Differentially expressed lncRNAs. [file 9275106.f1.xls]

## Sheet: 文件说明
表名称	列头	列头的含义
差异基因/lncRNA以及临近关系	Probe Set	mRNA/lncRNA芯片中的探针编号
	Gene Symbol/lncRNA	某一探针编号对应的基因名称/lncRNA名称
	Description	对基因/lncRNA的描述
	type	表示名称是属于mRNA或ncRNA,coding表示属于mRNA,noncoding表示属于lncRNA或microRNA
	P-value	p值,评估探针的信号值在组间的显著性水平，即探针对应的基因在组间具有差异
	FDR	误判率,对p值准确率的判断,对差异探针的显著性水平的再判断
	Geom mean of intensities in class Chu	实验组内同一探针信号值的几何平均数
	Geom mean of intensities in class C	对照组内同一探针信号值的几何平均数
	Fold-change（Chu/C)	实验组与对照组之间的差异倍数
	style	基因或lncRNA上/下调,根据均值倍数,判断探针对应的基因上/下调,(均值倍数>1,上调;均值倍数<1,下调)
	mRNA Accession/lncRNA Accession	差异探针对应的mRNA/lncRNA在genbank中的存取号
	mRNA Source/lncRNA Source	mRNA/lncRNA来源数据库
	mRNA Description/lncRNA Description	对mRNA/lncRNA的描述
	chromosome	该基因所在染色体名称
	strand	该基因所在染色体所属的链的属性。“+”表示正链，“-”表示负链
	start	该基因在染色体上的起始位点
	Stop	该基因在染色体上的终止位点
	GO Biological Process ID\Term\Evidence	在生物过程这一类中的GO，包括GO_id,GO_name以及evidence
	GO Cellular Component ID\Term\Evidence	在细胞组分这一类中的GO，包括GO_id,GO_name以及evidence
	GO Molecular Function ID\Term\Evidence	在分子功能这一类中的GO，包括GO_id,GO_name以及evidence
	Pathway Source	pathway来源
	Pathway Name	差异基因对应的pathway
	Protein Domains - Source	蛋白质结构域信息来源数据库
	Protein Domains - Accession or domain name	蛋白质结构域中的编号
	Protein Domains - Description	对蛋白质结构域的描述
	category	探针类型
	up stream.10kb	差异gene或ncRNA上游10kb内包含的芯片上的ncRNA或gene
	overlap	与差异gene或ncRNA在基因组上有交集的芯片上的ncRNA或gene
	down stream.10kb	gene或ncRNA下游10kb内包含的ncRNA或gene
	antisense	差异gene或ncRNA的反义链上有交集的芯片上的ncRNA或gene
	CHU1_(MTA-1_0).rma-gene-full-Signal	实验组样本的信号值,取过以2为底的对数
	CHU2_(MTA-1_0).rma-gene-full-Signal	实验组样本的信号值,取过以2为底的对数
	CHU3_(MTA-1_0).rma-gene-full-Signal	实验组样本的信号值,取过以2为底的对数
	C1_(MTA-1_0).rma-gene-full-Signal	对照组样本的信号值,取过以2为底的对数
	C2_(MTA-1_0).rma-gene-full-Signal	对照组样本的信号值,取过以2为底的对数
	C3_(MTA-1_0).rma-gene-full-Signal	对照组样本的信号值,取过以2为底的对数

## Sheet: 差异基因
ProbeSet	Gene Symbol	Description	type	P-value	FDR	Geom mean of intensities in class Chu	Geom mean of intensities in class C	Fold-change（Chu/C)	style	mRNA Accession	mRNA Source	mRna - Description	Chromosome	Strand	Start	Stop	GO Biological Process ID	GO Biological Process Term	GO Biological Process Evidence	GO Cellular Component ID	GO Cellular Component Term	GO Cellular Component Evidence	GO Molecular Function ID	GO Molecular Function Term	GO Molecular Function Evidence	Pathway Source	Pathway Name	Protein Domains - Source	Protein Domains - Accession or domain name	Protein Domains - Description	category	up stream.10kb	overlap	down stream.10kb	antisense	CHU1_(MTA-1_0).rma-gene-full-Signal	CHU2_(MTA-1_0).rma-gene-full-Signal	CHU3_(MTA-1_0).rma-gene-full-Signal	C1_(MTA-1_0).rma-gene-full-Signal	C2_(MTA-1_0).rma-gene-full-Signal	C3_(MTA-1_0).rma-gene-full-Signal
TC0500002755.mm.1	Cxcl9	chemokine (C-X-C motif) ligand 9 // chemokine (C-X-C motif) ligand 9 // chemokine (C-X-C motif) ligand 9 // chemokine (C-X-C motif) ligand 9	Coding	< 1e-07	< 1e-07	6517.99	16.04	406.23	up	NM_008599 // ENSMUST00000113093 // uc008ycv.2 // BC003343	RefSeq // ENSEMBL // UCSC Genes // GenBank	Mus musculus chemokine (C-X-C motif) ligand 9 (Cxcl9), mRNA. // cdna:known chromosome:GRCm38:5:92321331:92328079:-1 gene:ENSMUSG00000029417 gene_biotype:protein_coding transcript_biotype:protein_coding // chemokine (C-X-C motif) ligand 9 // Mus musculus chemokine (C-X-C motif) ligand 9, mRNA (cDNA clone MGC:6179 IMAGE:3257716), complete cds.	chr5	-	92321331	92328079	GO:0006935 // GO:0006954 // GO:0006955 // GO:0051607 // GO:0006935 // GO:0006954 // GO:0006955 // GO:0051607 // GO:0006935 // GO:0006954 // GO:0006955 // GO:0051607	chemotaxis // inflammatory response // immune response // defense response to virus // chemotaxis // inflammatory response // immune response // defense response to virus // chemotaxis // inflammatory response // immune response // defense response to virus	inferred from electronic annotation // inferred from electronic annotation // inferred from electronic annotation // inferred from direct assay // inferred from electronic annotation // inferred from electronic annotation // inferred from electronic annotation // inferred from direct assay // inferred from electronic annotation // inferred from electronic annotation // inferred from electronic an…	GO:0005576 // GO:0005615 // GO:0009897 // GO:0005615 // GO:0005576 // GO:0005615 // GO:0009897 // GO:0005615 // GO:0005576 // GO:0005615 // GO:0009897 // GO:0005615	extracellular region // extracellular space // external side of plasma membrane // extracellular space // extracellular region // extracellular space // external side of plasma membrane // extracellular space // extracellular region // extracellular space // external side of plasma membrane // extracellular space	inferred from electronic annotation // inferred from direct assay // inferred from direct assay // inferred from electronic annotation // inferred from electronic annotation // inferred from direct assay // inferred from direct assay // inferred from electronic annotation // inferred from electronic annotation // inferred from direct assay // inferred from direct assay // inferred from electronic…	GO:0005125 // GO:0008009 // GO:0005125 // GO:0008009 // GO:0005125 // GO:0008009	cytokine activity // chemokine activity // cytokine activity // chemokine activity // cytokine activity // chemokine activity	inferred from electronic annotation // inferred from electronic annotation // inferred from electronic annotation // inferred from electronic annotation // inferred from electronic annotation // inferred from electronic annotation	---	---	Pfam	IPR001811	Chemokine interleukin-8-like domain	main					12.7692	12.7411	12.5325	4.10595	4.02057	3.93321
TC0300001447.mm.1	Gbp2	guanylate binding protein 2 // guanylate binding protein 2 // guanylate binding protein 2 // guanylate binding protein 2 // guanylate binding protein 2 // guanylate binding protein 2 // --- // ---	Coding	< 1e-07	< 1e-07	4826.22	16.09	299.88	up	NM_010260 // ENSMUST00000165774 // ENSMUST00000169572 // uc008roy.1 // BC032882 // BC011336 // OTTMUST00000094412 // OTTMUST00000094413	RefSeq // ENSEMBL // ENSEMBL // UCSC Genes // GenBank // GenBank // Havana transcript // Havana transcript	Mus musculus guanylate binding protein 2 (Gbp2), mRNA. // cdna:known chromosome:GRCm38:3:142620602:142638008:1 gene:ENSMUSG00000028270 gene_biotype:protein_coding transcript_biotype:protein_coding // cdna:known chromosome:GRCm38:3:142620635:142630585:1 gene:ENSMUSG00000028270 gene_biotype:protein_coding transcript_biotype:nonsense_mediated_decay // guanylate binding protein 2 // Mus musculus guan…	chr3	+	142620602	142638008	GO:0006184 // GO:0035458 // GO:0042832 // GO:0050830 // GO:0051856 // GO:0071222 // GO:0071346 // GO:0006184 // GO:0006184 // GO:0035458 // GO:0042832 // GO:0050830 // GO:0051856 // GO:0071222 // GO:0071346 // GO:0006184 // GO:0006184 // GO:0035458 // GO:0042832 // GO:0050830 // GO:0051856 // GO:0071222 // GO:0071346 // GO:0006184 // GO:0006184 // GO:0035458 // GO:0042832 // GO:0050830 // GO:0051…	GTP catabolic process // cellular response to interferon-beta // defense response to protozoan // defense response to Gram-positive bacterium // adhesion to symbiont // cellular response to lipopolysaccharide // cellular response to interferon-gamma // GTP catabolic process // GTP catabolic process // cellular response to interferon-beta // defense response to protozoan // defense response to Gra…	inferred from sequence or structural similarity // inferred from direct assay // inferred from direct assay // inferred from direct assay // inferred from direct assay // inferred from direct assay // inferred from direct assay // inferred from electronic annotation // inferred from sequence or structural similarity // inferred from direct assay // inferred from direct assay // inferred from dire…	GO:0005634 // GO:0005737 // GO:0005794 // GO:0016020 // GO:0020005 // GO:0031410 // GO:0000139 // GO:0005634 // GO:0005737 // GO:0005794 // GO:0016020 // GO:0020005 // GO:0031410 // GO:0000139 // GO:0005634 // GO:0005737 // GO:0005794 // GO:0016020 // GO:0020005 // GO:0031410 // GO:0000139 // GO:0005634 // GO:0005737 // GO:0005794 // GO:0016020 // GO:0020005 // GO:0031410 // GO:0000139 // GO:0005…	nucleus // cytoplasm // Golgi apparatus // membrane // symbiont-containing vacuole membrane // cytoplasmic vesicle // Golgi membrane // nucleus // cytoplasm // Golgi apparatus // membrane // symbiont-containing vacuole membrane // cytoplasmic vesicle // Golgi membrane // nucleus // cytoplasm // Golgi apparatus // membrane // symbiont-containing vacuole membrane // cytoplasmic vesicle // Golgi mem…	inferred from electronic annotation // inferred from electronic annotation // inferred from electronic annotation // inferred from electronic annotation // inferred from direct assay // inferred from direct assay // inferred from electronic annotation // inferred from electronic annotation // inferred from electronic annotation // inferred from electronic annotation // inferred from electronic an…	GO:0000166 // GO:0003924 // GO:0005525 // GO:0003924 // GO:0000166 // GO:0003924 // GO:0005525 // GO:0016817 // GO:0003924 // GO:0000166 // GO:0003924 // GO:0005525 // GO:0003924 // GO:0000166 // GO:0003924 // GO:0005525 // GO:0003924 // GO:0000166 // GO:0003924 // GO:0005525 // GO:0003924	nucleotide binding // GTPase activity // GTP binding // GTPase activity // nucleotide binding // GTPase activity // GTP binding // hydrolase activity, acting on acid anhydrides // GTPase activity // nucleotide binding // GTPase activity // GTP binding // GTPase activity // nucleotide binding // GTPase activity // GTP binding // GTPase activity // nucleotide binding // GTPase activity // GTP bindi…	inferred from electronic annotation // inferred from sequence or structural similarity // inferred from electronic annotation // inferred from electronic annotation // inferred from electronic annotation // inferred from sequence or structural similarity // inferred from electronic annotation // inferred from electronic annotation // inferred from electronic annotation // inferred from electronic…	---	---	Pfam // Pfam // Pfam // Pfam	IPR003191 // IPR008803 // IPR015894 // IPR015894	Guanylate-binding protein, C-terminal // RHD3/Sey1 // Guanylate-binding protein, N-terminal // Guanylate-binding protein, N-terminal	main				NR_105802	12.3023	12.281	12.159	3.93383	4.20261	3.93647
TC0500002895.mm.1	Gbp10	guanylate-binding protein 10 // guanylate binding protein 6 // guanylate-binding protein 10 // guanylate binding protein 6 // guanylate-binding protein 10 // guanylate-binding protein 10 (Gbp10), mRNA. // guanylate binding protein 6 // guanylate binding protein 6 (Gbp6), mRNA. // guanylate binding protein 6 // guanylate-binding protein 10 // guanylate binding protein 6 // guanylate binding protei…	Coding	< 1e-07	< 1e-07	3559.33	16.09	221.17	up	NM_001039646 // NM_194336 // ENSMUST00000065588 // ENSMUST00000050011 // uc008ykz.2 // uc008yla.2 // uc012eag.1 // uc008ylb.2 // BC115768 // BC112328 // BC057969 // BC007143	RefSeq // RefSeq // ENSEMBL // ENSEMBL // UCSC Genes // UCSC Genes // UCSC Genes // UCSC Genes // GenBank // GenBank // GenBank // GenBank	Mus musculus guanylate-binding protein 10 (Gbp10), mRNA. // Mus musculus guanylate binding protein 6 (Gbp6), mRNA. // cdna:known chromosome:GRCm38:5:105215699:105239533:-1 gene:ENSMUSG00000054588 gene_biotype:protein_coding transcript_biotype:protein_coding // cdna:known chromosome:GRCm38:5:105270704:105293699:-1 gene:ENSMUSG00000079362 gene_biotype:protein_coding transcript_biotype:protein_codin…	chr5	-	105215525	105293699	GO:0042832 // GO:0050830 // GO:0050830 // GO:0071222 // GO:0071346 // GO:0006184 // GO:0035458 // GO:0042832 // GO:0050830 // GO:0050830 // GO:0051856 // GO:0071222 // GO:0071346 // GO:0006184 // GO:0042832 // GO:0050830 // GO:0050830 // GO:0071222 // GO:0071346 // GO:0006184 // GO:0035458 // GO:0042832 // GO:0050830 // GO:0050830 // GO:0051856 // GO:0071222 // GO:0071346 // GO:0006184 // GO:0035…	defense response to protozoan // defense response to Gram-positive bacterium // defense response to Gram-positive bacterium // cellular response to lipopolysaccharide // cellular response to interferon-gamma // GTP catabolic process // cellular response to interferon-beta // defense response to protozoan // defense response to Gram-positive bacterium // defense response to Gram-positive bacterium…	inferred from direct assay // inferred from direct assay // inferred from mutant phenotype // inferred from direct assay // inferred from direct assay // inferred from electronic annotation // inferred from direct assay // inferred from direct assay // inferred from direct assay // inferred from mutant phenotype // inferred from direct assay // inferred from direct assay // inferred from direct a…	GO:0031410 // GO:0020005 // GO:0031410 // GO:0031410 // GO:0020005 // GO:0031410 // GO:0020005 // GO:0031410 // GO:0031410 // GO:0020005 // GO:0031410 // GO:0020005 // GO:0031410	cytoplasmic vesicle // symbiont-containing vacuole membrane // cytoplasmic vesicle // cytoplasmic vesicle // symbiont-containing vacuole membrane // cytoplasmic vesicle // symbiont-containing vacuole membrane // cytoplasmic vesicle // cytoplasmic vesicle // symbiont-containing vacuole membrane // cytoplasmic vesicle // symbiont-containing vacuole membrane // cytoplasmic vesicle	inferred from direct assay // inferred from direct assay // inferred from direct assay // inferred from direct assay // inferred from direct assay // inferred from direct assay // inferred from direct assay // inferred from direct assay // inferred from direct assay // inferred from direct assay // inferred from direct assay // inferred from direct assay // inferred from direct assay	GO:0003674 // GO:0003924 // GO:0005525 // GO:0003674 // GO:0003924 // GO:0005525 // GO:0003924 // GO:0005525 // GO:0003674 // GO:0003924 // GO:0003674 // GO:0005525 // GO:0003674 // GO:0003924 // GO:0005525 // GO:0003674 // GO:0003924 // GO:0005525 // GO:0003674 // GO:0003924 // GO:0005525 // GO:0003674 // GO:0003924 // GO:0005525	molecular_function // GTPase activity // GTP binding // molecular_function // GTPase activity // GTP binding // GTPase activity // GTP binding // molecular_function // GTPase activity // molecular_function // GTP binding // molecular_function // GTPase activity // GTP binding // molecular_function // GTPase activity // GTP binding // molecular_function // GTPase activity // GTP binding // molecul…	no biological data available // inferred from electronic annotation // inferred from electronic annotation // no biological data available // inferred from electronic annotation // inferred from electronic annotation // inferred from electronic annotation // inferred from electronic annotation // no biological data available // inferred from electronic annotation // no biological data available /…	---	---	Pfam // Pfam // Pfam // Pfam	IPR003191 // IPR015894 // IPR003191 // IPR015894	Guanylate-binding protein, C-terminal // Guanylate-binding protein, N-terminal // Guanylate-binding protein, C-terminal // Guanylate-binding protein, N-terminal	main					11.9197	11.8252	11.6795	4.04008	4.04251	3.99014
TC1100000681.mm.1	Gm12250	predicted gene 12250 // predicted gene 12250 // predicted gene 12250 // predicted gene 12250 // ---	Coding	< 1e-07	< 1e-07	1888.51	12.28	153.81	up	NM_001135115 // ENSMUST00000164282 // ENSMUST00000119467 // uc011xvf.1 // OTTMUST00000012723	RefSeq // ENSEMBL // ENSEMBL // UCSC Genes // Havana transcript	Mus musculus predicted gene 12250 (Gm12250), mRNA. // cdna:pseudogene chromosome:GRCm38:11:58183843:58190198:1 gene:ENSMUSG00000082292 gene_biotype:pseudogene transcript_biotype:processed_pseudogene // cdna:pseudogene chromosome:GRCm38:11:58187739:58189012:1 gene:ENSMUSG00000082292 gene_biotype:pseudogene transcript_biotype:processed_pseudogene // predicted gene 12250 // interferon gamma inducibl…	chr11	+	58183843	58190198	---	---	---	GO:0016020 // GO:0016020 // GO:0016020	membrane // membrane // membrane	inferred from electronic annotation // inferred from electronic annotation // inferred from electronic annotation	GO:0005525 // GO:0016817 // GO:0005525 // GO:0016817 // GO:0005525 // GO:0016817	GTP binding // hydrolase activity, acting on acid anhydrides // GTP binding // hydrolase activity, acting on acid anhydrides // GTP binding // hydrolase activity, acting on acid anhydrides	inferred from electronic annotation // inferred from electronic annotation // inferred from electronic annotation // inferred from electronic annotation // inferred from electronic annotation // inferred from electronic annotation	---	---	---	---	---	main	NONMMUT009924 4262bp;				10.9114	10.9266	10.8433	3.9624	3.76943	3.16974
TC1800000609.mm.1	F830016B08Rik	RIKEN cDNA F830016B08 gene // RIKEN cDNA F830016B08 gene	Coding	< 1e-07	< 1e-07	1517.16	15.27	99.33	up	NM_001101475 // ENSMUST00000171297 // uc008faa.2	RefSeq // ENSEMBL // UCSC Genes	Mus musculus RIKEN cDNA F830016B08 gene (F830016B08Rik), mRNA. // cdna:known chromosome:GRCm38:18:60293380:60303016:1 gene:ENSMUSG00000090942 gene_biotype:protein_coding transcript_biotype:protein_coding // RIKEN cDNA F830016B08 gene	chr18	+	60293380	60303016	GO:0008150 // GO:0008150	biological_process // biological_process	no biological data available // no biological data available	GO:0005575 // GO:0016020 // GO:0005575 // GO:0016020	cellular_component // membrane // cellular_component // membrane	no biological data available // inferred from electronic annotation // no biological data available // inferred from electronic annotation	GO:0003674 // GO:0005525 // GO:0016817 // GO:0003674 // GO:0005525 // GO:0016817	molecular_function // GTP binding // hydrolase activity, acting on acid anhydrides // molecular_function // GTP binding // hydrolase activity, acting on acid anhydrides	no biological data available // inferred from electronic annotation // inferred from electronic annotation // no biological data available // inferred from electronic annotation // inferred from electronic annotation	---	---	Pfam // Pfam	IPR006073 // IPR007743	GTP binding domain // Interferon-inducible GTPase	main	NONMMUT032521 4883bp;				10.5495	10.7155	10.4687	3.57164	4.20427	4.07075
TC0300001446.mm.1	Gbp3	guanylate binding protein 3 // guanylate binding protein 3 // guanylate binding protein 3 // guanylate binding protein 3 // guanylate binding protein 3 // guanylate binding protein 3 // guanylate binding protein 3 // guanylate binding protein 3 // guanylate binding protein 3 // guanylate binding protein 3 // guanylate binding protein 3 // --- // --- // --- // --- // --- // ---	Coding	< 1e-07	< 1e-07	1918.03	21.6	88.82	up	NM_001289492 // NM_018734 // NM_001289493 // ENSMUST00000106222 // ENSMUST00000128609 // ENSMUST00000029935 // ENSMUST00000142731 // ENSMUST00000106221 // ENSMUST00000142060 // uc008rou.1 // uc008rov.1 // uc008row.1 // BC019195 // OTTMUST00000055907 // OTTMUST00000055909 // OTTMUST00000055906 // OTTMUST00000055911 // OTTMUST00000055908 // OTTMUST00000055910	RefSeq // RefSeq // RefSeq // ENSEMBL // ENSEMBL // ENSEMBL // ENSEMBL // ENSEMBL // ENSEMBL // UCSC Genes // UCSC Genes // UCSC Genes // GenBank // Havana transcript // Havana transcript // Havana transcript // Havana transcript // Havana transcript // Havana transcript	guanylate binding protein 3 (Gbp3), transcript variant 1, mRNA. // Mus musculus guanylate binding protein 3 (Gbp3), mRNA. // guanylate binding protein 3 (Gbp3), transcript variant 3, mRNA. // cdna:known chromosome:GRCm38:3:142560052:142573202:1 gene:ENSMUSG00000028268 gene_biotype:protein_coding transcript_biotype:protein_coding // cdna:known chromosome:GRCm38:3:142560143:142564183:1 gene:ENSMUSG…	chr3	+	142560052	142573212	GO:0006184 // GO:0035458 // GO:0042832 // GO:0050830 // GO:0051856 // GO:0071346 // GO:0006184 // GO:0006184 // GO:0035458 // GO:0042832 // GO:0050830 // GO:0051856 // GO:0071346 // GO:0006184 // GO:0006184 // GO:0035458 // GO:0042832 // GO:0050830 // GO:0051856 // GO:0071346 // GO:0006184 // GO:0006184 // GO:0035458 // GO:0042832 // GO:0050830 // GO:0051856 // GO:0071346 // GO:0006184 // GO:0006…	GTP catabolic process // cellular response to interferon-beta // defense response to protozoan // defense response to Gram-positive bacterium // adhesion to symbiont // cellular response to interferon-gamma // GTP catabolic process // GTP catabolic process // cellular response to interferon-beta // defense response to protozoan // defense response to Gram-positive bacterium // adhesion to symbion…	inferred from sequence or structural similarity // inferred from direct assay // inferred from direct assay // inferred from direct assay // inferred from direct assay // inferred from direct assay // inferred from electronic annotation // inferred from sequence or structural similarity // inferred from direct assay // inferred from direct assay // inferred from direct assay // inferred from dire…	GO:0005634 // GO:0005737 // GO:0005829 // GO:0020005 // GO:0031410 // GO:0005634 // GO:0005737 // GO:0005829 // GO:0020005 // GO:0031410 // GO:0005634 // GO:0005737 // GO:0005829 // GO:0020005 // GO:0031410 // GO:0005634 // GO:0005737 // GO:0005829 // GO:0020005 // GO:0031410 // GO:0005634 // GO:0005737 // GO:0005829 // GO:0020005 // GO:0031410 // GO:0005634 // GO:0005737 // GO:0005829 // GO:0020…	nucleus // cytoplasm // cytosol // symbiont-containing vacuole membrane // cytoplasmic vesicle // nucleus // cytoplasm // cytosol // symbiont-containing vacuole membrane // cytoplasmic vesicle // nucleus // cytoplasm // cytosol // symbiont-containing vacuole membrane // cytoplasmic vesicle // nucleus // cytoplasm // cytosol // symbiont-containing vacuole membrane // cytoplasmic vesicle // nucleus…	inferred from electronic annotation // inferred from electronic annotation // inferred from direct assay // inferred from direct assay // inferred from direct assay // inferred from electronic annotation // inferred from electronic annotation // inferred from direct assay // inferred from direct assay // inferred from direct assay // inferred from electronic annotation // inferred from electronic…	GO:0000166 // GO:0003924 // GO:0005525 // GO:0003924 // GO:0000166 // GO:0003924 // GO:0005525 // GO:0003924 // GO:0000166 // GO:0003924 // GO:0005525 // GO:0003924 // GO:0000166 // GO:0003924 // GO:0005525 // GO:0003924 // GO:0000166 // GO:0003924 // GO:0005525 // GO:0003924 // GO:0000166 // GO:0003924 // GO:0005525 // GO:0003924 // GO:0000166 // GO:0003924 // GO:0005525 // GO:0016817 // GO:0003…	nucleotide binding // GTPase activity // GTP binding // GTPase activity // nucleotide binding // GTPase activity // GTP binding // GTPase activity // nucleotide binding // GTPase activity // GTP binding // GTPase activity // nucleotide binding // GTPase activity // GTP binding // GTPase activity // nucleotide binding // GTPase activity // GTP binding // GTPase activity // nucleotide binding // GT…	inferred from electronic annotation // inferred from sequence or structural similarity // inferred from electronic annotation // inferred from electronic annotation // inferred from electronic annotation // inferred from sequence or structural similarity // inferred from electronic annotation // inferred from electronic annotation // inferred from electronic annotation // inferred from sequence o…	---	---	Pfam // Pfam // Pfam // Pfam // Pfam // Pfam // Pfam // Pfam // Pfam	IPR003191 // IPR015894 // IPR015894 // IPR003191 // IPR015894 // IPR003191 // IPR015894 // IPR008803 // IPR015894	Guanylate-binding protein, C-terminal // Guanylate-binding protein, N-terminal // Guanylate-binding protein, N-terminal // Guanylate-binding protein, C-terminal // Guanylate-binding protein, N-terminal // Guanylate-binding protein, C-terminal // Guanylate-binding protein, N-terminal // RHD3/Sey1 // Guanylate-binding protein, N-terminal	main	NONMMUT045556 9901bp;				11.0157	10.9485	10.7842	4.35169	4.49703	4.49684
TC1900000504.mm.1	Ifit1	interferon-induced protein with tetratricopeptide repeats 1 // interferon-induced protein with tetratricopeptide repeats 1 // interferon-induced protein with tetratricopeptide repeats 1 // interferon-induced protein with tetratricopeptide repeats 1 // ---	Coding	< 1e-07	< 1e-07	2043.3	25.12	81.33	up	NM_008331 // ENSMUST00000102824 // uc008hgt.1 // BC003768 // OTTMUST00000040265	RefSeq // ENSEMBL // UCSC Genes // GenBank // Havana transcript	Mus musculus interferon-induced protein with tetratricopeptide repeats 1 (Ifit1), mRNA. // cdna:known chromosome:GRCm38:19:34640871:34650009:1 gene:ENSMUSG00000034459 gene_biotype:protein_coding transcript_biotype:protein_coding // interferon-induced protein with tetratricopeptide repeats 1 // Mus musculus interferon-induced protein with tetratricopeptide repeats 1, mRNA (cDNA clone MGC:5959 IMAG…	chr19	+	34640871	34650009	GO:0009615 // GO:0035457 // GO:0035458 // GO:0045087 // GO:0050688 // GO:0051607 // GO:0071357 // GO:0071360 // GO:0009615 // GO:0009615 // GO:0035457 // GO:0035458 // GO:0045087 // GO:0050688 // GO:0051607 // GO:0071357 // GO:0071360 // GO:0009615 // GO:0009615 // GO:0035457 // GO:0035458 // GO:0045087 // GO:0050688 // GO:0051607 // GO:0071357 // GO:0071360 // GO:0009615	response to virus // cellular response to interferon-alpha // cellular response to interferon-beta // innate immune response // regulation of defense response to virus // defense response to virus // cellular response to type I interferon // cellular response to exogenous dsRNA // response to virus // response to virus // cellular response to interferon-alpha // cellular response to interferon-be…	inferred from mutant phenotype // inferred from direct assay // inferred from direct assay // inferred from electronic annotation // inferred from electronic annotation // inferred from electronic annotation // inferred from electronic annotation // inferred from electronic annotation // inferred from electronic annotation // inferred from mutant phenotype // inferred from direct assay // inferre…	GO:0005737 // GO:0005737 // GO:0005737 // GO:0005737 // GO:0005737 // GO:0005737	cytoplasm // cytoplasm // cytoplasm // cytoplasm // cytoplasm // cytoplasm	inferred from direct assay // inferred from electronic annotation // inferred from direct assay // inferred from electronic annotation // inferred from direct assay // inferred from electronic annotation	GO:0003723 // GO:0005515 // GO:0003723 // GO:0003723 // GO:0005515 // GO:0003723 // GO:0003723 // GO:0005515 // GO:0003723	RNA binding // protein binding // RNA binding // RNA binding // protein binding // RNA binding // RNA binding // protein binding // RNA binding	inferred from electronic annotation // inferred from physical interaction // inferred from sequence or structural similarity // inferred from electronic annotation // inferred from physical interaction // inferred from sequence or structural similarity // inferred from electronic annotation // inferred from physical interaction // inferred from sequence or structural similarity	---	---	---	---	---	main					11.0897	11.1349	10.7977	4.57684	4.78174	4.64209
TC1400001182.mm.1	Irg1	immunoresponsive gene 1 // immunoresponsive gene 1 // immunoresponsive gene 1 // ---	Coding	< 1e-07	< 1e-07	1491.01	19.08	78.13	up	NM_008392 // ENSMUST00000022722 // uc007uwf.2 // OTTMUST00000091038	RefSeq // ENSEMBL // UCSC Genes // Havana transcript	Mus musculus immunoresponsive gene 1 (Irg1), mRNA. // cdna:known chromosome:GRCm38:14:103046977:103056573:1 gene:ENSMUSG00000022126 gene_biotype:protein_coding transcript_biotype:protein_coding // immunoresponsive gene 1 // immunoresponsive gene 1	chr14	+	103046977	103056573	GO:0019543 // GO:0032496 // GO:0002760 // GO:0002760 // GO:0006952 // GO:0006952 // GO:0006954 // GO:0007566 // GO:0008152 // GO:0008152 // GO:0032088 // GO:0032480 // GO:0034136 // GO:0034144 // GO:0035458 // GO:0045087 // GO:0045824 // GO:0050728 // GO:0071219 // GO:0071222 // GO:0071222 // GO:0071346 // GO:0071347 // GO:0071356 // GO:0071393 // GO:0072573 // GO:0072573 // GO:2000379 // GO:0019…	propionate catabolic process // response to lipopolysaccharide // positive regulation of antimicrobial humoral response // positive regulation of antimicrobial humoral response // defense response // defense response // inflammatory response // embryo implantation // metabolic process // metabolic process // negative regulation of NF-kappaB transcription factor activity // negative regulation of …	inferred from electronic annotation // inferred from direct assay // inferred from direct assay // inferred from electronic annotation // inferred from direct assay // inferred from electronic annotation // inferred from electronic annotation // inferred from mutant phenotype // inferred from direct assay // inferred from electronic annotation // inferred from mutant phenotype // inferred from mu…	GO:0005739 // GO:0005739 // GO:0005739 // GO:0005739	mitochondrion // mitochondrion // mitochondrion // mitochondrion	inferred from direct assay // inferred from electronic annotation // inferred from direct assay // inferred from electronic annotation	GO:0047547 // GO:0016829 // GO:0047613 // GO:0047613 // GO:0047547 // GO:0016829 // GO:0047613 // GO:0047613	2-methylcitrate dehydratase activity // lyase activity // aconitate decarboxylase activity // aconitate decarboxylase activity // 2-methylcitrate dehydratase activity // lyase activity // aconitate decarboxylase activity // aconitate decarboxylase activity	inferred from electronic annotation // inferred from electronic annotation // inferred from direct assay // inferred from electronic annotation // inferred from electronic annotation // inferred from electronic annotation // inferred from direct assay // inferred from electronic annotation	---	---	Pfam	IPR005656	MmgE/PrpD	main					10.6558	10.6022	10.4004	4.16866	4.24164	4.39986
TC0900000031.mm.1	Casp1	caspase 1 // caspase 1 // caspase 1 // caspase 1	Coding	< 1e-07	< 1e-07	1018.23	13.72	74.22	up	NM_009807 // ENSMUST00000027015 // uc009obr.1 // BC008152	RefSeq // ENSEMBL // UCSC Genes // GenBank	Mus musculus caspase 1 (Casp1), mRNA. // cdna:known chromosome:GRCm38:9:5298517:5307265:1 gene:ENSMUSG00000025888 gene_biotype:protein_coding transcript_biotype:protein_coding // caspase 1 // Mus musculus caspase 1, mRNA (cDNA clone MGC:6106 IMAGE:3583883), complete cds.	chr9	+	5298517	5307281	GO:0001666 // GO:0001666 // GO:0001774 // GO:0006508 // GO:0006915 // GO:0006917 // GO:0006917 // GO:0007520 // GO:0007613 // GO:0008219 // GO:0014070 // GO:0016485 // GO:0016485 // GO:0032496 // GO:0032496 // GO:0032611 // GO:0033198 // GO:0042493 // GO:0042981 // GO:0043065 // GO:0043123 // GO:0046010 // GO:0050715 // GO:0050715 // GO:0050717 // GO:0050718 // GO:0050718 // GO:0051882 // GO:0060…	response to hypoxia // response to hypoxia // microglial cell activation // proteolysis // apoptotic process // induction of apoptosis // induction of apoptosis // myoblast fusion // memory // cell death // response to organic cyclic compound // protein processing // protein processing // response to lipopolysaccharide // response to lipopolysaccharide // interleukin-1 beta production // response…	inferred from mutant phenotype // not recorded // not recorded // not recorded // inferred from electronic annotation // inferred from direct assay // inferred from mutant phenotype // not recorded // not recorded // inferred from direct assay // not recorded // inferred from direct assay // inferred from mutant phenotype // inferred from direct assay // not recorded // inferred from genetic inte…	GO:0005576 // GO:0005622 // GO:0005634 // GO:0005737 // GO:0005737 // GO:0043005 // GO:0043234 // GO:0072557 // GO:0072558 // GO:0072559 // GO:0097169 // GO:0005737 // GO:0005829 // GO:0072558 // GO:0072558 // GO:0072559 // GO:0072559 // GO:0097169 // GO:0097169 // GO:0005576 // GO:0005622 // GO:0005634 // GO:0005737 // GO:0005737 // GO:0043005 // GO:0043234 // GO:0072557 // GO:0072558 // GO:0072…	extracellular region // intracellular // nucleus // cytoplasm // cytoplasm // neuron projection // protein complex // IPAF inflammasome complex // NLRP1 inflammasome complex // NLRP3 inflammasome complex // AIM2 inflammasome complex // cytoplasm // cytosol // NLRP1 inflammasome complex // NLRP1 inflammasome complex // NLRP3 inflammasome complex // NLRP3 inflammasome complex // AIM2 inflammasome c…	inferred from direct assay // inferred from electronic annotation // not recorded // not recorded // traceable author statement // not recorded // not recorded // inferred from direct assay // not recorded // not recorded // not recorded // inferred from electronic annotation // traceable author statement // inferred from electronic annotation // inferred from sequence or structural similarity //…	GO:0004197 // GO:0005515 // GO:0008233 // GO:0008234 // GO:0016787 // GO:0097110 // GO:0008233 // GO:0004197 // GO:0005515 // GO:0008233 // GO:0008234 // GO:0016787 // GO:0097110 // GO:0005515 // GO:0008233 // GO:0004197 // GO:0005515 // GO:0008233 // GO:0008234 // GO:0016787 // GO:0097110 // GO:0008233	cysteine-type endopeptidase activity // protein binding // peptidase activity // cysteine-type peptidase activity // hydrolase activity // scaffold protein binding // peptidase activity // cysteine-type endopeptidase activity // protein binding // peptidase activity // cysteine-type peptidase activity // hydrolase activity // scaffold protein binding // protein binding // peptidase activity // cy…	inferred from electronic annotation // inferred from physical interaction // inferred from direct assay // inferred from electronic annotation // inferred from electronic annotation // not recorded // inferred from electronic annotation // inferred from electronic annotation // inferred from physical interaction // inferred from direct assay // inferred from electronic annotation // inferred from…	GenMAPP // GenMAPP // GenMAPP // GenMAPP // GenMAPP // GenMAPP	Apoptosis // Apoptosis_KEGG // Apoptosis // Apoptosis_KEGG // Apoptosis // Apoptosis_KEGG	Pfam // Pfam	IPR001315 // IPR011600	Caspase Recruitment // Peptidase C14, caspase catalytic	main			NONMMUT067923 1547bp;		10.101	10.0345	9.87227	3.83538	3.70467	3.8416
TC1200001552.mm.1	Rsad2	radical S-adenosyl methionine domain containing 2 // radical S-adenosyl methionine domain containing 2 // radical S-adenosyl methionine domain containing 2 // radical S-adenosyl methionine domain containing 2 // radical S-adenosyl methionine domain containing 2 (Rsad2), mRNA. // radical S-adenosyl methionine domain containing 2 (Rsad2), mRNA. // radical S-adenosyl methionine domain containing 2 /…	Coding	< 1e-07	< 1e-07	1600.86	24.44	65.49	up	NM_021384 // ENSMUST00000137792 // ENSMUST00000020970 // ENSMUST00000142732 // uc011ylb.1 // uc007nfi.2 // uc007nfh.2 // BC057868 // OTTMUST00000068266 // OTTMUST00000068265 // OTTMUST00000068267	RefSeq // ENSEMBL // ENSEMBL // ENSEMBL // UCSC Genes // UCSC Genes // UCSC Genes // GenBank // Havana transcript // Havana transcript // Havana transcript	Mus musculus radical S-adenosyl methionine domain containing 2 (Rsad2), mRNA. // cdna:known chromosome:GRCm38:12:26442753:26456431:-1 gene:ENSMUSG00000020641 gene_biotype:protein_coding transcript_biotype:nonsense_mediated_decay // cdna:known chromosome:GRCm38:12:26442753:26456452:-1 gene:ENSMUSG00000020641 gene_biotype:protein_coding transcript_biotype:protein_coding // cdna:known chromosome:GRC…	chr12	-	26442743	26456452	GO:0001503 // GO:0009615 // GO:0009615 // GO:0030278 // GO:0034157 // GO:0034165 // GO:0035710 // GO:0043367 // GO:0045071 // GO:0045071 // GO:0045087 // GO:0050709 // GO:0051607 // GO:0051607 // GO:2000553 // GO:0008152 // GO:0009615 // GO:0045071 // GO:0050709 // GO:0050709 // GO:0051607 // GO:0001503 // GO:0009615 // GO:0009615 // GO:0030278 // GO:0034157 // GO:0034165 // GO:0035710 // GO:0043…	ossification // response to virus // response to virus // regulation of ossification // positive regulation of toll-like receptor 7 signaling pathway // positive regulation of toll-like receptor 9 signaling pathway // CD4-positive, alpha-beta T cell activation // CD4-positive, alpha-beta T cell differentiation // negative regulation of viral genome replication // negative regulation of viral geno…	not recorded // inferred from mutant phenotype // not recorded // not recorded // inferred from mutant phenotype // inferred from mutant phenotype // inferred from mutant phenotype // inferred from mutant phenotype // inferred from mutant phenotype // not recorded // inferred from electronic annotation // not recorded // inferred from direct assay // not recorded // inferred from mutant phenotype…	GO:0005739 // GO:0005741 // GO:0005743 // GO:0005783 // GO:0005789 // GO:0005811 // GO:0016020 // GO:0005739 // GO:0005741 // GO:0005743 // GO:0005783 // GO:0005789 // GO:0005789 // GO:0005811 // GO:0005739 // GO:0005741 // GO:0005743 // GO:0005783 // GO:0005789 // GO:0005811 // GO:0016020 // GO:0005739 // GO:0005741 // GO:0005743 // GO:0005783 // GO:0005789 // GO:0005789 // GO:0005811 // GO:0005…	mitochondrion // mitochondrial outer membrane // mitochondrial inner membrane // endoplasmic reticulum // endoplasmic reticulum membrane // lipid particle // membrane // mitochondrion // mitochondrial outer membrane // mitochondrial inner membrane // endoplasmic reticulum // endoplasmic reticulum membrane // endoplasmic reticulum membrane // lipid particle // mitochondrion // mitochondrial outer …	not recorded // not recorded // not recorded // not recorded // not recorded // inferred from direct assay // inferred from electronic annotation // inferred from electronic annotation // inferred from electronic annotation // inferred from electronic annotation // inferred from electronic annotation // inferred from electronic annotation // inferred from sequence or structural similarity // infe…	GO:0003824 // GO:0005515 // GO:0043621 // GO:0046872 // GO:0051536 // GO:0051539 // GO:0003674 // GO:0043621 // GO:0043621 // GO:0051539 // GO:0051539 // GO:0003824 // GO:0005515 // GO:0043621 // GO:0046872 // GO:0051536 // GO:0051539 // GO:0003674 // GO:0043621 // GO:0043621 // GO:0051539 // GO:0051539 // GO:0003824 // GO:0005515 // GO:0043621 // GO:0046872 // GO:0051536 // GO:0051539 // GO:0005…	catalytic activity // protein binding // protein self-association // metal ion binding // iron-sulfur cluster binding // 4 iron, 4 sulfur cluster binding // molecular_function // protein self-association // protein self-association // 4 iron, 4 sulfur cluster binding // 4 iron, 4 sulfur cluster binding // catalytic activity // protein binding // protein self-association // metal ion binding // ir…	inferred from electronic annotation // inferred from physical interaction // not recorded // inferred from electronic annotation // inferred from electronic annotation // not recorded // no biological data available // inferred from electronic annotation // inferred from sequence or structural similarity // inferred from electronic annotation // inferred from sequence or structural similarity // …	---	---	Pfam // Pfam	IPR007197 // IPR007197	Radical SAM // Radical SAM	main					10.6973	10.7145	10.5544	4.69796	4.39874	4.78517
TC0500003731.mm.1	Gbp4	guanylate binding protein 4 // guanylate binding protein 4 // guanylate binding protein 4 // guanylate binding protein 4 (Gbp4), transcript variant 1, mRNA. // guanylate binding protein 4 // guanylate binding protein 4	Coding	< 1e-07	< 1e-07	1686.95	26.19	64.41	up	NM_008620 // NM_001256005 // ENSMUST00000100962 // uc008ykx.2 // uc008yky.2 // BC141364	RefSeq // RefSeq // ENSEMBL // UCSC Genes // UCSC Genes // GenBank	Mus musculus guanylate binding protein 4 (Gbp4), transcript variant 2, mRNA. // Mus musculus guanylate binding protein 4 (Gbp4), transcript variant 1, mRNA. // cdna:known chromosome:GRCm38:5:105115767:105139586:-1 gene:ENSMUSG00000079363 gene_biotype:protein_coding transcript_biotype:protein_coding // guanylate binding protein 4 (Gbp4), transcript variant 1, mRNA. // guanylate binding protein 4 /…	chr5	-	105115767	105139586	GO:0000122 // GO:0001933 // GO:0031397 // GO:0032687 // GO:0042308 // GO:0050688 // GO:0071346 // GO:0006184 // GO:0000122 // GO:0001933 // GO:0031397 // GO:0032687 // GO:0042308 // GO:0050688 // GO:0071346 // GO:0006184 // GO:0000122 // GO:0001933 // GO:0031397 // GO:0032687 // GO:0042308 // GO:0050688 // GO:0071346 // GO:0006184 // GO:0000122 // GO:0001933 // GO:0031397 // GO:0032687 // GO:0042…	negative regulation of transcription from RNA polymerase II promoter // negative regulation of protein phosphorylation // negative regulation of protein ubiquitination // negative regulation of interferon-alpha production // negative regulation of protein import into nucleus // regulation of defense response to virus // cellular response to interferon-gamma // GTP catabolic process // negative re…	inferred from genetic interaction // inferred from direct assay // inferred from genetic interaction // inferred from mutant phenotype // inferred from direct assay // inferred from mutant phenotype // inferred from direct assay // inferred from electronic annotation // inferred from genetic interaction // inferred from direct assay // inferred from genetic interaction // inferred from mutant phe…	GO:0005575 // GO:0005575 // GO:0005575 // GO:0005575	cellular_component // cellular_component // cellular_component // cellular_component	no biological data available // no biological data available // no biological data available // no biological data available	GO:0005515 // GO:0003924 // GO:0005525 // GO:0005515 // GO:0003924 // GO:0005525 // GO:0005515 // GO:0003924 // GO:0005525 // GO:0005515 // GO:0003924 // GO:0005525	protein binding // GTPase activity // GTP binding // protein binding // GTPase activity // GTP binding // protein binding // GTPase activity // GTP binding // protein binding // GTPase activity // GTP binding	inferred from physical interaction // inferred from electronic annotation // inferred from electronic annotation // inferred from physical interaction // inferred from electronic annotation // inferred from electronic annotation // inferred from physical interaction // inferred from electronic annotation // inferred from electronic annotation // inferred from physical interaction // inferred from…	---	---	Pfam // Pfam	IPR003191 // IPR015894	Guanylate-binding protein, C-terminal // Guanylate-binding protein, N-terminal	main					10.835	10.8015	10.5562	4.78716	4.86026	4.53329
TC1800001396.mm.1	Gm4841	predicted gene 4841 // predicted gene 4841 // predicted gene 4841 // predicted gene 4841	Coding	< 1e-07	< 1e-07	1013.72	16.06	63.13	up	NM_001034859 // ENSMUST00000090260 // uc012bdk.1 // BC150900	RefSeq // ENSEMBL // UCSC Genes // GenBank	Mus musculus predicted gene 4841 (Gm4841), mRNA. // cdna:known chromosome:GRCm38:18:60268301:60273267:-1 gene:ENSMUSG00000068606 gene_biotype:protein_coding transcript_biotype:protein_coding // predicted gene 4841 // Mus musculus cDNA clone MGC:183811 IMAGE:9087811, complete cds.	chr18	-	60268301	60273267	GO:0008150 // GO:0007264 // GO:0008150 // GO:0008150	biological_process // small GTPase mediated signal transduction // biological_process // biological_process	no biological data available // inferred from electronic annotation // no biological data available // no biological data available	GO:0005575 // GO:0016020 // GO:0005622 // GO:0005575 // GO:0016020 // GO:0005575 // GO:0016020	cellular_component // membrane // intracellular // cellular_component // membrane // cellular_component // membrane	no biological data available // inferred from electronic annotation // inferred from electronic annotation // no biological data available // inferred from electronic annotation // no biological data available // inferred from electronic annotation	GO:0003674 // GO:0005525 // GO:0016817 // GO:0003924 // GO:0003674 // GO:0005525 // GO:0016817 // GO:0003674 // GO:0005525 // GO:0016817	molecular_function // GTP binding // hydrolase activity, acting on acid anhydrides // GTPase activity // molecular_function // GTP binding // hydrolase activity, acting on acid anhydrides // molecular_function // GTP binding // hydrolase activity, acting on acid anhydrides	no biological data available // inferred from electronic annotation // inferred from electronic annotation // inferred from electronic annotation // no biological data available // inferred from electronic annotation // inferred from electronic annotation // no biological data available // inferred from electronic annotation // inferred from electronic annotation	---	---	Pfam // Pfam // Pfam // Pfam	IPR004881 // IPR006073 // IPR007743 // IPR013684	Ribosome biogenesis GTPase RsgA, putative // GTP binding domain // Interferon-inducible GTPase // Mitochondrial Rho-like	main				NONMMUT032521	9.68523	10.1291	10.1742	3.87977	4.03068	4.15241
TC0500002896.mm.1	Gbp11	guanylate binding protein 11 // guanylate binding protein 11 // guanylate binding protein 11 // guanylate binding protein 11 // guanylate binding protein 11 // guanylate binding protein 11 // ---	Coding	< 1e-07	< 1e-07	1176.15	19.26	61.07	up	NM_001039647 // ENSMUST00000100960 // ENSMUST00000183149 // ENSMUST00000171587 // uc008ylc.2 // BC111039 // OTTMUST00000111793	RefSeq // ENSEMBL // ENSEMBL // ENSEMBL // UCSC Genes // GenBank // Havana transcript	Mus musculus guanylate binding protein 11 (Gbp11), mRNA. // cdna:known chromosome:GRCm38:5:105323042:105346472:-1 gene:ENSMUSG00000092021 gene_biotype:polymorphic_pseudogene transcript_biotype:polymorphic_pseudogene // guanylate binding protein 11 // cdna:known chromosome:GRCm38:5:105326480:105343929:-1 gene:ENSMUSG00000092021 gene_biotype:polymorphic_pseudogene transcript_biotype:protein_coding …	chr5	-	105323026	105346472	GO:0006184 // GO:0008150 // GO:0008150 // GO:0006184 // GO:0008150 // GO:0006184 // GO:0006184 // GO:0008150	GTP catabolic process // biological_process // biological_process // GTP catabolic process // biological_process // GTP catabolic process // GTP catabolic process // biological_process	inferred from electronic annotation // no biological data available // no biological data available // inferred from electronic annotation // no biological data available // inferred from electronic annotation // inferred from electronic annotation // no biological data available	GO:0005575 // GO:0005575 // GO:0005575 // GO:0005575	cellular_component // cellular_component // cellular_component // cellular_component	no biological data available // no biological data available // no biological data available // no biological data available	GO:0003674 // GO:0003924 // GO:0005525 // GO:0003924 // GO:0003674 // GO:0005525 // GO:0003924 // GO:0003674 // GO:0005525 // GO:0003674 // GO:0003924 // GO:0005525	molecular_function // GTPase activity // GTP binding // GTPase activity // molecular_function // GTP binding // GTPase activity // molecular_function // GTP binding // molecular_function // GTPase activity // GTP binding	no biological data available // inferred from electronic annotation // inferred from electronic annotation // inferred from electronic annotation // no biological data available // inferred from electronic annotation // inferred from electronic annotation // no biological data available // inferred from electronic annotation // no biological data available // inferred from electronic annotation /…	---	---	Pfam // Pfam	IPR003191 // IPR015894	Guanylate-binding protein, C-terminal // Guanylate-binding protein, N-terminal	main					10.3642	10.3602	9.90741	4.18686	4.51114	4.15169
TC1200002524.mm.1	Serpina3f	serine (or cysteine) peptidase inhibitor, clade A, member 3F // serine (or cysteine) peptidase inhibitor, clade A, member 3F // serine (or cysteine) peptidase inhibitor, clade A, member 3F // serine (or cysteine) peptidase inhibitor, clade A, member 3F // serine (or cysteine) peptidase inhibitor, clade A, member 3F // serine (or cysteine) peptidase inhibitor, clade A, member 3F // serine (or cyst…	Coding	< 1e-07	< 1e-07	1698.67	30.71	55.31	up	NM_001168294 // NM_001168295 // NM_001033335 // ENSMUST00000121337 // ENSMUST00000167049 // ENSMUST00000101080 // uc007oww.2 // uc007owx.2 // uc007owy.2 // BC139132 // OTTMUST00000068279 // OTTMUST00000068280	RefSeq // RefSeq // RefSeq // ENSEMBL // ENSEMBL // ENSEMBL // UCSC Genes // UCSC Genes // UCSC Genes // GenBank // Havana transcript // Havana transcript	Mus musculus serine (or cysteine) peptidase inhibitor, clade A, member 3F (Serpina3f), transcript variant 1, mRNA. // Mus musculus serine (or cysteine) peptidase inhibitor, clade A, member 3F (Serpina3f), transcript variant 3, mRNA. // Mus musculus serine (or cysteine) peptidase inhibitor, clade A, member 3F (Serpina3f), transcript variant 2, mRNA. // cdna:known chromosome:GRCm38:12:104214544:104…	chr12	+	104214544	104221129	GO:0010466 // GO:0010951 // GO:0030162 // GO:0034097 // GO:0043434 // GO:0010951 // GO:0030162 // GO:0010466 // GO:0010951 // GO:0030162 // GO:0034097 // GO:0043434 // GO:0010951 // GO:0030162 // GO:0010466 // GO:0010951 // GO:0030162 // GO:0034097 // GO:0043434 // GO:0010951 // GO:0030162 // GO:0010466 // GO:0010951 // GO:0030162 // GO:0034097 // GO:0043434 // GO:0010951 // GO:0030162 // GO:0010…	negative regulation of peptidase activity // negative regulation of endopeptidase activity // regulation of proteolysis // response to cytokine stimulus // response to peptide hormone stimulus // negative regulation of endopeptidase activity // regulation of proteolysis // negative regulation of peptidase activity // negative regulation of endopeptidase activity // regulation of proteolysis // re…	inferred from electronic annotation // not recorded // not recorded // inferred from direct assay // inferred from direct assay // --- // --- // inferred from electronic annotation // not recorded // not recorded // inferred from direct assay // inferred from direct assay // --- // --- // inferred from electronic annotation // not recorded // not recorded // inferred from direct assay // inferred…	GO:0005576 // GO:0005576 // GO:0005615 // GO:0005576 // GO:0005576 // GO:0005615 // GO:0005576 // GO:0005576 // GO:0005615 // GO:0005576 // GO:0005576 // GO:0005615 // GO:0005576 // GO:0005576 // GO:0005615 // GO:0005576 // GO:0005576 // GO:0005615 // GO:0005576 // GO:0005576 // GO:0005615	extracellular region // extracellular region // extracellular space // extracellular region // extracellular region // extracellular space // extracellular region // extracellular region // extracellular space // extracellular region // extracellular region // extracellular space // extracellular region // extracellular region // extracellular space // extracellular region // extracellular region…	not recorded // --- // inferred from electronic annotation // not recorded // --- // inferred from electronic annotation // not recorded // --- // inferred from electronic annotation // not recorded // --- // inferred from electronic annotation // not recorded // --- // inferred from electronic annotation // not recorded // --- // inferred from electronic annotation // not recorded // --- // infe…	GO:0004867 // GO:0030414 // GO:0004867 // GO:0004867 // GO:0004867 // GO:0030414 // GO:0004867 // GO:0004867 // GO:0004867 // GO:0030414 // GO:0004867 // GO:0004867 // GO:0004867 // GO:0030414 // GO:0004867 // GO:0004867 // GO:0004867 // GO:0030414 // GO:0004867 // GO:0004867 // GO:0004867 // GO:0030414 // GO:0004867 // GO:0004867 // GO:0004867 // GO:0030414 // GO:0004867 // GO:0004867	serine-type endopeptidase inhibitor activity // peptidase inhibitor activity // serine-type endopeptidase inhibitor activity // serine-type endopeptidase inhibitor activity // serine-type endopeptidase inhibitor activity // peptidase inhibitor activity // serine-type endopeptidase inhibitor activity // serine-type endopeptidase inhibitor activity // serine-type endopeptidase inhibitor activity //…	not recorded // inferred from electronic annotation // --- // inferred from electronic annotation // not recorded // inferred from electronic annotation // --- // inferred from electronic annotation // not recorded // inferred from electronic annotation // --- // inferred from electronic annotation // not recorded // inferred from electronic annotation // --- // inferred from electronic annotatio…	---	---	Pfam // Pfam // Pfam	IPR023796 // IPR023796 // IPR023796	Serpin domain // Serpin domain // Serpin domain	main					10.8114	10.7553	10.6561	5.05091	5.0026	4.81641
TC0200005290.mm.1	Zbp1	Z-DNA binding protein 1 // Z-DNA binding protein 1 // Z-DNA binding protein 1 // Z-DNA binding protein 1 // Z-DNA binding protein 1 // Z-DNA binding protein 1 // Z-DNA binding protein 1 // Z-DNA binding protein 1 // --- // --- // ---	Coding	< 1e-07	< 1e-07	1648.23	31.81	51.81	up	NM_021394 // NM_001139519 // ENSMUST00000029018 // ENSMUST00000146802 // ENSMUST00000109116 // uc008odo.3 // uc008odp.2 // BC020033 // OTTMUST00000040401 // OTTMUST00000040403 // OTTMUST00000040402	RefSeq // RefSeq // ENSEMBL // ENSEMBL // ENSEMBL // UCSC Genes // UCSC Genes // GenBank // Havana transcript // Havana transcript // Havana transcript	Mus musculus Z-DNA binding protein 1 (Zbp1), transcript variant 1, mRNA. // Mus musculus Z-DNA binding protein 1 (Zbp1), transcript variant 2, mRNA. // cdna:known chromosome:GRCm38:2:173206612:173218923:-1 gene:ENSMUSG00000027514 gene_biotype:protein_coding transcript_biotype:protein_coding // cdna:known chromosome:GRCm38:2:173206615:173218897:-1 gene:ENSMUSG00000027514 gene_biotype:protein_codin…	chr2	-	173206612	173218923	GO:0019048 // GO:0045087 // GO:0051607 // GO:0060340 // GO:0019048 // GO:0045087 // GO:0051607 // GO:0060340 // GO:0019048 // GO:0045087 // GO:0051607 // GO:0060340 // GO:0019048 // GO:0045087 // GO:0051607 // GO:0060340 // GO:0019048 // GO:0045087 // GO:0051607 // GO:0060340 // GO:0019048 // GO:0045087 // GO:0051607 // GO:0060340	virus-host interaction // innate immune response // defense response to virus // positive regulation of type I interferon-mediated signaling pathway // virus-host interaction // innate immune response // defense response to virus // positive regulation of type I interferon-mediated signaling pathway // virus-host interaction // innate immune response // defense response to virus // positive regul…	inferred from electronic annotation // inferred from electronic annotation // inferred from electronic annotation // inferred from mutant phenotype // inferred from electronic annotation // inferred from electronic annotation // inferred from electronic annotation // inferred from mutant phenotype // inferred from electronic annotation // inferred from electronic annotation // inferred from elect…	GO:0005634 // GO:0005737 // GO:0005829 // GO:0005634 // GO:0005737 // GO:0005829 // GO:0005634 // GO:0005737 // GO:0005829 // GO:0005634 // GO:0005737 // GO:0005829 // GO:0005634 // GO:0005737 // GO:0005829 // GO:0005634 // GO:0005737 // GO:0005829 // GO:0005829 // GO:0005634 // GO:0005634 // GO:0005737 // GO:0005737 // GO:0005829 // GO:0005634 // GO:0005737 // GO:0005829 // GO:0005634 // GO:0005…	nucleus // cytoplasm // cytosol // nucleus // cytoplasm // cytosol // nucleus // cytoplasm // cytosol // nucleus // cytoplasm // cytosol // nucleus // cytoplasm // cytosol // nucleus // cytoplasm // cytosol // cytosol // nucleus // nucleus // cytoplasm // cytoplasm // cytosol // nucleus // cytoplasm // cytosol // nucleus // cytoplasm // cytosol // nucleus // cytoplasm // cytosol // cytosol // nuc…	not recorded // not recorded // not recorded // --- // --- // traceable author statement // inferred from electronic annotation // inferred from electronic annotation // inferred from electronic annotation // not recorded // not recorded // not recorded // --- // --- // traceable author statement // not recorded // not recorded // not recorded // inferred from electronic annotation // --- // infe…	GO:0003677 // GO:0003677 // GO:0003692 // GO:0003723 // GO:0003726 // GO:0005515 // GO:0003677 // GO:0003677 // GO:0003677 // GO:0003692 // GO:0003723 // GO:0003726 // GO:0005515 // GO:0003677 // GO:0003677 // GO:0003677 // GO:0003692 // GO:0003723 // GO:0003726 // GO:0005515 // GO:0003677 // GO:0003677 // GO:0003677 // GO:0003692 // GO:0003723 // GO:0003726 // GO:0005515 // GO:0003677 // GO:0003…	DNA binding // DNA binding // left-handed Z-DNA binding // RNA binding // double-stranded RNA adenosine deaminase activity // protein binding // DNA binding // DNA binding // DNA binding // left-handed Z-DNA binding // RNA binding // double-stranded RNA adenosine deaminase activity // protein binding // DNA binding // DNA binding // DNA binding // left-handed Z-DNA binding // RNA binding // doubl…	inferred from direct assay // not recorded // inferred from direct assay // inferred from electronic annotation // inferred from electronic annotation // inferred from physical interaction // inferred from electronic annotation // inferred from direct assay // not recorded // inferred from direct assay // inferred from electronic annotation // inferred from electronic annotation // inferred from …	GenMAPP // GenMAPP // GenMAPP // GenMAPP // GenMAPP // GenMAPP	mRNA_processing_binding_Reactome // mRNA_processing_binding_Reactome // mRNA_processing_binding_Reactome // mRNA_processing_binding_Reactome // mRNA_processing_binding_Reactome // mRNA_processing_binding_Reactome	Pfam // Pfam	IPR000607 // IPR000607	Double-stranded RNA-specific adenosine deaminase (DRADA) // Double-stranded RNA-specific adenosine deaminase (DRADA)	main	NONMMUT041558 5535bp;				10.7864	10.6736	10.6323	4.70238	5.0791	5.24067
TC1100004265.mm.1	Igtp	interferon gamma induced GTPase // interferon gamma induced GTPase // interferon gamma induced GTPase // interferon gamma induced GTPase // interferon gamma induced GTPase (Igtp), mRNA. // interferon gamma induced GTPase (Igtp), mRNA. // interferon gamma induced GTPase // interferon gamma induced GTPase // --- // --- // ---	Coding	< 1e-07	< 1e-07	3512.67	70.84	49.59	up	NM_018738 // ENSMUST00000035266 // ENSMUST00000094169 // ENSMUST00000168280 // uc007jar.1 // uc007jaq.1 // uc007jas.2 // BC132557 // OTTMUST00000012730 // OTTMUST00000093591 // OTTMUST00000093592	RefSeq // ENSEMBL // ENSEMBL // ENSEMBL // UCSC Genes // UCSC Genes // UCSC Genes // GenBank // Havana transcript // Havana transcript // Havana transcript	Mus musculus interferon gamma induced GTPase (Igtp), mRNA. // cdna:known chromosome:GRCm38:11:58199556:58207591:1 gene:ENSMUSG00000078853 gene_biotype:protein_coding transcript_biotype:protein_coding // cdna:putative chromosome:GRCm38:11:58199586:58207565:1 gene:ENSMUSG00000078853 gene_biotype:protein_coding transcript_biotype:protein_coding // cdna:putative chromosome:GRCm38:11:58199588:58207575…	chr11	+	58199556	58207592	GO:0006184 // GO:0035458 // GO:0006184 // GO:0035458 // GO:0006184 // GO:0035458 // GO:0006184 // GO:0035458 // GO:0006184 // GO:0035458	GTP catabolic process // cellular response to interferon-beta // GTP catabolic process // cellular response to interferon-beta // GTP catabolic process // cellular response to interferon-beta // GTP catabolic process // cellular response to interferon-beta // GTP catabolic process // cellular response to interferon-beta	inferred from direct assay // inferred from direct assay // inferred from direct assay // inferred from direct assay // inferred from direct assay // inferred from direct assay // inferred from direct assay // inferred from direct assay // inferred from direct assay // inferred from direct assay	GO:0005829 // GO:0016020 // GO:0005829 // GO:0016020 // GO:0005829 // GO:0016020 // GO:0005829 // GO:0016020 // GO:0005829 // GO:0016020	cytosol // membrane // cytosol // membrane // cytosol // membrane // cytosol // membrane // cytosol // membrane	inferred from direct assay // inferred from electronic annotation // inferred from direct assay // inferred from electronic annotation // inferred from direct assay // inferred from electronic annotation // inferred from direct assay // inferred from electronic annotation // inferred from direct assay // inferred from electronic annotation	GO:0003924 // GO:0005525 // GO:0016817 // GO:0003924 // GO:0005525 // GO:0016817 // GO:0003924 // GO:0005525 // GO:0016817 // GO:0003924 // GO:0005525 // GO:0016817 // GO:0003924 // GO:0005525 // GO:0016817	GTPase activity // GTP binding // hydrolase activity, acting on acid anhydrides // GTPase activity // GTP binding // hydrolase activity, acting on acid anhydrides // GTPase activity // GTP binding // hydrolase activity, acting on acid anhydrides // GTPase activity // GTP binding // hydrolase activity, acting on acid anhydrides // GTPase activity // GTP binding // hydrolase activity, acting on aci…	inferred from direct assay // inferred from electronic annotation // inferred from electronic annotation // inferred from direct assay // inferred from electronic annotation // inferred from electronic annotation // inferred from direct assay // inferred from electronic annotation // inferred from electronic annotation // inferred from direct assay // inferred from electronic annotation // inferr…	---	---	Pfam	IPR007743	Interferon-inducible GTPase	main		NONMMUT009926			11.858	11.8111	11.6982	6.26157	6.21238	6.0129
TC0500003730.mm.1	Gbp9	guanylate-binding protein 9 // guanylate-binding protein 9 // guanylate-binding protein 9 // guanylate-binding protein 9	Coding	< 1e-07	< 1e-07	908.27	18.41	49.34	up	NM_172777 // ENSMUST00000031238 // uc008ykw.2 // BC057170	RefSeq // ENSEMBL // UCSC Genes // GenBank	Mus musculus guanylate-binding protein 9 (Gbp9), mRNA. // cdna:known chromosome:GRCm38:5:105078394:105110292:-1 gene:ENSMUSG00000029298 gene_biotype:protein_coding transcript_biotype:protein_coding // guanylate-binding protein 9 // Mus musculus cDNA sequence BC057170, mRNA (cDNA clone MGC:68037 IMAGE:4978410), complete cds.	chr5	-	105078394	105110292	GO:0042832 // GO:0050830 // GO:0051856 // GO:0071346 // GO:0006184 // GO:0042832 // GO:0050830 // GO:0051856 // GO:0071346 // GO:0006184 // GO:0042832 // GO:0050830 // GO:0051856 // GO:0071346 // GO:0006184	defense response to protozoan // defense response to Gram-positive bacterium // adhesion to symbiont // cellular response to interferon-gamma // GTP catabolic process // defense response to protozoan // defense response to Gram-positive bacterium // adhesion to symbiont // cellular response to interferon-gamma // GTP catabolic process // defense response to protozoan // defense response to Gram-p…	inferred from direct assay // inferred from direct assay // inferred from direct assay // inferred from direct assay // inferred from electronic annotation // inferred from direct assay // inferred from direct assay // inferred from direct assay // inferred from direct assay // inferred from electronic annotation // inferred from direct assay // inferred from direct assay // inferred from direct …	GO:0020005 // GO:0031410 // GO:0020005 // GO:0031410 // GO:0020005 // GO:0031410	symbiont-containing vacuole membrane // cytoplasmic vesicle // symbiont-containing vacuole membrane // cytoplasmic vesicle // symbiont-containing vacuole membrane // cytoplasmic vesicle	inferred from direct assay // inferred from direct assay // inferred from direct assay // inferred from direct assay // inferred from direct assay // inferred from direct assay	GO:0003674 // GO:0003924 // GO:0005525 // GO:0003924 // GO:0005525 // GO:0003674 // GO:0003674 // GO:0003924 // GO:0005525	molecular_function // GTPase activity // GTP binding // GTPase activity // GTP binding // molecular_function // molecular_function // GTPase activity // GTP binding	no biological data available // inferred from electronic annotation // inferred from electronic annotation // inferred from electronic annotation // inferred from electronic annotation // no biological data available // no biological data available // inferred from electronic annotation // inferred from electronic annotation	---	---	Pfam // Pfam	IPR003191 // IPR015894	Guanylate-binding protein, C-terminal // Guanylate-binding protein, N-terminal	main					9.89191	9.88406	9.73716	4.18637	4.26893	4.19921
TC1200002525.mm.1	Serpina3g	serine (or cysteine) peptidase inhibitor, clade A, member 3G // serine (or cysteine) peptidase inhibitor, clade A, member 3G // serine (or cysteine) peptidase inhibitor, clade A, member 3G // serine (or cysteine) peptidase inhibitor, clade A, member 3G // serine (or cysteine) peptidase inhibitor, clade A, member 3G // serine (or cysteine) peptidase inhibitor, clade A, member 3G // --- // --- // -…	Coding	< 1e-07	< 1e-07	686.64	14.34	47.9	up	NM_009251 // ENSMUST00000171065 // ENSMUST00000043315 // ENSMUST00000171916 // ENSMUST00000170628 // uc007oxa.2 // OTTMUST00000090575 // OTTMUST00000090576 // OTTMUST00000090577 // OTTMUST00000090578	RefSeq // ENSEMBL // ENSEMBL // ENSEMBL // ENSEMBL // UCSC Genes // Havana transcript // Havana transcript // Havana transcript // Havana transcript	Mus musculus serine (or cysteine) peptidase inhibitor, clade A, member 3G (Serpina3g), mRNA. // cdna:known chromosome:GRCm38:12:104236245:104238259:1 gene:ENSMUSG00000041481 gene_biotype:protein_coding transcript_biotype:processed_transcript // cdna:known chromosome:GRCm38:12:104236252:104241939:1 gene:ENSMUSG00000041481 gene_biotype:protein_coding transcript_biotype:protein_coding // cdna:known …	chr12	+	104236242	104241939	GO:0006915 // GO:0010466 // GO:0010951 // GO:0030162 // GO:0034097 // GO:0043434 // GO:0010951 // GO:0030162 // GO:0006915 // GO:0010466 // GO:0010951 // GO:0030162 // GO:0034097 // GO:0043434 // GO:0010951 // GO:0030162 // GO:0034097 // GO:0043434 // GO:0006915 // GO:0010466 // GO:0010951 // GO:0030162 // GO:0034097 // GO:0043434 // GO:0006915 // GO:0010466 // GO:0006915 // GO:0010466 // GO:0010…	apoptotic process // negative regulation of peptidase activity // negative regulation of endopeptidase activity // regulation of proteolysis // response to cytokine stimulus // response to peptide hormone stimulus // negative regulation of endopeptidase activity // regulation of proteolysis // apoptotic process // negative regulation of peptidase activity // negative regulation of endopeptidase a…	inferred from electronic annotation // inferred from electronic annotation // not recorded // not recorded // inferred from direct assay // inferred from direct assay // --- // --- // inferred from electronic annotation // inferred from electronic annotation // --- // --- // inferred from direct assay // inferred from direct assay // --- // --- // inferred from direct assay // inferred from direc…	GO:0005576 // GO:0005634 // GO:0005737 // GO:0005576 // GO:0005615 // GO:0005576 // GO:0005615 // GO:0005634 // GO:0005737 // GO:0005576 // GO:0005615 // GO:0005634 // GO:0005737 // GO:0005576 // GO:0005615 // GO:0005634 // GO:0005737 // GO:0005576 // GO:0005615 // GO:0005634 // GO:0005737	extracellular region // nucleus // cytoplasm // extracellular region // extracellular space // extracellular region // extracellular space // nucleus // cytoplasm // extracellular region // extracellular space // nucleus // cytoplasm // extracellular region // extracellular space // nucleus // cytoplasm // extracellular region // extracellular space // nucleus // cytoplasm	not recorded // inferred from electronic annotation // inferred from electronic annotation // --- // inferred from electronic annotation // --- // inferred from electronic annotation // inferred from electronic annotation // inferred from electronic annotation // --- // inferred from electronic annotation // inferred from electronic annotation // inferred from electronic annotation // --- // infe…	GO:0004867 // GO:0004869 // GO:0030414 // GO:0004867 // GO:0004867 // GO:0004867 // GO:0004867 // GO:0004869 // GO:0030414 // GO:0004867 // GO:0004867 // GO:0004869 // GO:0030414 // GO:0004867 // GO:0004867 // GO:0004869 // GO:0030414 // GO:0004867 // GO:0004867 // GO:0004869 // GO:0030414	serine-type endopeptidase inhibitor activity // cysteine-type endopeptidase inhibitor activity // peptidase inhibitor activity // serine-type endopeptidase inhibitor activity // serine-type endopeptidase inhibitor activity // serine-type endopeptidase inhibitor activity // serine-type endopeptidase inhibitor activity // cysteine-type endopeptidase inhibitor activity // peptidase inhibitor activit…	not recorded // inferred from electronic annotation // inferred from electronic annotation // --- // inferred from electronic annotation // --- // inferred from electronic annotation // inferred from electronic annotation // inferred from electronic annotation // --- // inferred from electronic annotation // inferred from electronic annotation // inferred from electronic annotation // --- // infe…	---	---	Pfam // Pfam	IPR023796 // IPR023796	Serpin domain // Serpin domain	main			NONMMUT015496 5957bp;		9.67543	9.60317	9.02384	3.86847	3.88254	3.8211
TC0100003891.mm.1	Ifi203	interferon activated gene 203 // interferon activated gene 203 // uncharacterized LOC100862473 // predicted gene 16340 // interferon activated gene 203 // uncharacterized LOC100862473 // predicted gene 16340 // interferon activated gene 203 // uncharacterized LOC100862473 // predicted gene 16340 // interferon activated gene 203 // uncharacterized LOC100862473 // predicted gene 16340 // interferon…	Coding	< 1e-07	< 1e-07	481.72	10.21	47.2	up	NM_008328 // NM_001045481 // ENSMUST00000042228 // ENSMUST00000081216 // ENSMUST00000123708 // ENSMUST00000156895 // ENSMUST00000128430 // ENSMUST00000129829 // ENSMUST00000135331 // ENSMUST00000138143 // ENSMUST00000140143 // uc007dsd.1 // uc007dse.1 // uc007dsc.1 // uc007dsh.1 // uc007dsf.1 // uc007dsg.1 // uc007dsi.2 // uc007dsj.1 // BC008167 // OTTMUST00000066681 // OTTMUST00000066683 // OTTM…	RefSeq // RefSeq // ENSEMBL // ENSEMBL // ENSEMBL // ENSEMBL // ENSEMBL // ENSEMBL // ENSEMBL // ENSEMBL // ENSEMBL // UCSC Genes // UCSC Genes // UCSC Genes // UCSC Genes // UCSC Genes // UCSC Genes // UCSC Genes // UCSC Genes // GenBank // Havana transcript // Havana transcript // Havana transcript // Havana transcript // Havana transcript // Havana transcript // Havana transcript	Mus musculus interferon activated gene 203 (Ifi203), transcript variant 2, mRNA. // Mus musculus interferon activated gene 203 (Ifi203), transcript variant 1, mRNA. // cdna:known chromosome:GRCm38:1:173920407:173942460:-1 gene:ENSMUSG00000039997 gene_biotype:protein_coding transcript_biotype:protein_coding // cdna:known chromosome:GRCm38:1:173920407:173942460:-1 gene:ENSMUSG00000039997 gene_bioty…	chr1	-	173920400	173942672	GO:0035458 // GO:0030308 // GO:0040008 // GO:0035458 // GO:0030308 // GO:0040008 // GO:0035458 // GO:0030308 // GO:0040008 // GO:0035458 // GO:0030308 // GO:0040008 // GO:0035458 // GO:0030308 // GO:0040008 // GO:0035458 // GO:0030308 // GO:0040008 // GO:0035458 // GO:0030308 // GO:0040008 // GO:0035458 // GO:0030308 // GO:0040008 // GO:0035458 // GO:0030308 // GO:0040008 // GO:0035458 // GO:0030…	cellular response to interferon-beta // negative regulation of cell growth // regulation of growth // cellular response to interferon-beta // negative regulation of cell growth // regulation of growth // cellular response to interferon-beta // negative regulation of cell growth // regulation of growth // cellular response to interferon-beta // negative regulation of cell growth // regulation of g…	inferred from direct assay // inferred from mutant phenotype // inferred from electronic annotation // inferred from direct assay // inferred from mutant phenotype // inferred from electronic annotation // inferred from direct assay // inferred from mutant phenotype // inferred from electronic annotation // inferred from direct assay // inferred from mutant phenotype // inferred from electronic a…	GO:0005634 // GO:0005634 // GO:0005634 // GO:0005634 // GO:0005634 // GO:0005634 // GO:0005634 // GO:0005634 // GO:0005634 // GO:0005634 // GO:0005634 // GO:0005634 // GO:0005634 // GO:0005634 // GO:0005634 // GO:0005634 // GO:0005634 // GO:0005634 // GO:0005634 // GO:0005634 // GO:0005634 // GO:0005634 // GO:0005634 // GO:0005634	nucleus // nucleus // nucleus // nucleus // nucleus // nucleus // nucleus // nucleus // nucleus // nucleus // nucleus // nucleus // nucleus // nucleus // nucleus // nucleus // nucleus // nucleus // nucleus // nucleus // nucleus // nucleus // nucleus // nucleus	inferred from electronic annotation // inferred from direct assay // inferred from electronic annotation // inferred from direct assay // inferred from electronic annotation // inferred from direct assay // inferred from electronic annotation // inferred from direct assay // inferred from electronic annotation // inferred from direct assay // inferred from electronic annotation // inferred from d…	GO:0003674 // GO:0003674 // GO:0003674 // GO:0003674 // GO:0003674 // GO:0003674 // GO:0003674 // GO:0003674 // GO:0003674 // GO:0003674 // GO:0003674 // GO:0003674	molecular_function // molecular_function // molecular_function // molecular_function // molecular_function // molecular_function // molecular_function // molecular_function // molecular_function // molecular_function // molecular_function // molecular_function	no biological data available // no biological data available // no biological data available // no biological data available // no biological data available // no biological data available // no biological data available // no biological data available // no biological data available // no biological data available // no biological data available // no biological data available	---	---	Pfam // Pfam // Pfam // Pfam // Pfam // Pfam // Pfam // Pfam // Pfam // Pfam	IPR004020 // IPR004021 // IPR004020 // IPR004021 // IPR004020 // IPR004021 // IPR004020 // IPR004021 // IPR004020 // IPR004021	DAPIN domain // HIN-200/IF120x // DAPIN domain // HIN-200/IF120x // DAPIN domain // HIN-200/IF120x // DAPIN domain // HIN-200/IF120x // DAPIN domain // HIN-200/IF120x	main			NONMMUT003879 6221bp;		9.15447	9.05311	8.56074	3.34147	3.41354	3.34621
TC0900003125.mm.1	Ccrl2	chemokine (C-C motif) receptor-like 2 // chemokine (C-C motif) receptor-like 2 // chemokine (C-C motif) receptor-like 2 // chemokine (C-C motif) receptor-like 2 (Ccrl2), mRNA. // chemokine (C-C motif) receptor-like 2	Coding	< 1e-07	< 1e-07	877.86	20.51	42.79	up	NM_017466 // ENSMUST00000111888 // uc009rvk.1 // uc009rvl.1 // BC038631	RefSeq // ENSEMBL // UCSC Genes // UCSC Genes // GenBank	Mus musculus chemokine (C-C motif) receptor-like 2 (Ccrl2), mRNA. // cdna:known chromosome:GRCm38:9:111054835:111057270:-1 gene:ENSMUSG00000043953 gene_biotype:protein_coding transcript_biotype:protein_coding // chemokine (C-C motif) receptor-like 2 // chemokine (C-C motif) receptor-like 2 (Ccrl2), mRNA. // Mus musculus chemokine (C-C motif) receptor-like 2, mRNA (cDNA clone MGC:47919 IMAGE:13470…	chr9	-	111054834	111057519	GO:0006935 // GO:0006954 // GO:0007165 // GO:0007186 // GO:0070098 // GO:0070098 // GO:0007186 // GO:0006935 // GO:0006954 // GO:0007165 // GO:0007186 // GO:0070098 // GO:0070098 // GO:0007186 // GO:0006935 // GO:0006954 // GO:0007165 // GO:0007186 // GO:0070098 // GO:0070098 // GO:0007186	chemotaxis // inflammatory response // signal transduction // G-protein coupled receptor signaling pathway // chemokine-mediated signaling pathway // chemokine-mediated signaling pathway // G-protein coupled receptor signaling pathway // chemotaxis // inflammatory response // signal transduction // G-protein coupled receptor signaling pathway // chemokine-mediated signaling pathway // chemokine-m…	inferred from electronic annotation // inferred from direct assay // inferred from electronic annotation // inferred from sequence or structural similarity // inferred from electronic annotation // inferred from sequence or structural similarity // inferred from electronic annotation // inferred from electronic annotation // inferred from direct assay // inferred from electronic annotation // inf…	GO:0005886 // GO:0005887 // GO:0016020 // GO:0016021 // GO:0005887 // GO:0005887 // GO:0005886 // GO:0005887 // GO:0016020 // GO:0016021 // GO:0005887 // GO:0005887 // GO:0005886 // GO:0005887 // GO:0016020 // GO:0016021 // GO:0005887 // GO:0005887	plasma membrane // integral to plasma membrane // membrane // integral to membrane // integral to plasma membrane // integral to plasma membrane // plasma membrane // integral to plasma membrane // membrane // integral to membrane // integral to plasma membrane // integral to plasma membrane // plasma membrane // integral to plasma membrane // membrane // integral to membrane // integral to plasm…	inferred from electronic annotation // not recorded // inferred from electronic annotation // inferred from electronic annotation // inferred from electronic annotation // inferred from sequence or structural similarity // inferred from electronic annotation // not recorded // inferred from electronic annotation // inferred from electronic annotation // inferred from sequence or structural simila…	GO:0004871 // GO:0004930 // GO:0004950 // GO:0016493 // GO:0042379 // GO:0042379 // GO:0048020 // GO:0048020 // GO:0004871 // GO:0004930 // GO:0004950 // GO:0016493 // GO:0042379 // GO:0042379 // GO:0048020 // GO:0048020 // GO:0004871 // GO:0004930 // GO:0004950 // GO:0016493 // GO:0042379 // GO:0042379 // GO:0048020 // GO:0048020	signal transducer activity // G-protein coupled receptor activity // chemokine receptor activity // C-C chemokine receptor activity // chemokine receptor binding // chemokine receptor binding // CCR chemokine receptor binding // CCR chemokine receptor binding // signal transducer activity // G-protein coupled receptor activity // chemokine receptor activity // C-C chemokine receptor activity // c…	inferred from electronic annotation // inferred from electronic annotation // inferred from electronic annotation // inferred from sequence or structural similarity // inferred from physical interaction // not recorded // not recorded // inferred from electronic annotation // inferred from electronic annotation // inferred from electronic annotation // inferred from electronic annotation // infer…	GenMAPP // GenMAPP // GenMAPP	GPCRDB_Class_A_Rhodopsin-like // GPCRDB_Class_A_Rhodopsin-like // GPCRDB_Class_A_Rhodopsin-like	Pfam	IPR000276	G protein-coupled receptor, rhodopsin-like	main					9.85235	9.88912	9.62427	4.60305	4.2996	4.22056
TC1100001171.mm.1	Nos2	nitric oxide synthase 2, inducible // nitric oxide synthase 2, inducible // nitric oxide synthase 2, inducible // nitric oxide synthase 2, inducible // ---	Coding	< 1e-07	< 1e-07	1142.48	27.04	42.25	up	NM_010927 // ENSMUST00000018610 // uc007kkc.1 // BC062378 // OTTMUST00000000466	RefSeq // ENSEMBL // UCSC Genes // GenBank // Havana transcript	Mus musculus nitric oxide synthase 2, inducible (Nos2), mRNA. // cdna:known chromosome:GRCm38:11:78920787:78960254:1 gene:ENSMUSG00000020826 gene_biotype:protein_coding transcript_biotype:protein_coding // nitric oxide synthase 2, inducible // Mus musculus nitric oxide synthase 2, inducible, mRNA (cDNA clone MGC:68162 IMAGE:4978648), complete cds. // nitric oxide synthase 2, inducible, macrophage	chr11	+	78920787	78960254	GO:0001542 // GO:0001666 // GO:0001974 // GO:0006527 // GO:0006527 // GO:0006801 // GO:0006809 // GO:0006809 // GO:0006954 // GO:0007165 // GO:0007199 // GO:0007243 // GO:0007263 // GO:0008016 // GO:0008217 // GO:0010629 // GO:0010629 // GO:0018119 // GO:0019934 // GO:0031284 // GO:0034612 // GO:0042127 // GO:0042177 // GO:0042742 // GO:0042742 // GO:0043065 // GO:0045776 // GO:0045909 // GO:0050…	ovulation from ovarian follicle // response to hypoxia // blood vessel remodeling // arginine catabolic process // arginine catabolic process // superoxide metabolic process // nitric oxide biosynthetic process // nitric oxide biosynthetic process // inflammatory response // signal transduction // G-protein coupled receptor signaling pathway coupled to cGMP nucleotide second messenger // intracel…	inferred from mutant phenotype // inferred from direct assay // not recorded // inferred from direct assay // not recorded // inferred from mutant phenotype // inferred from direct assay // not recorded // traceable author statement // not recorded // not recorded // not recorded // not recorded // not recorded // not recorded // inferred from genetic interaction // not recorded // inferred from …	GO:0005615 // GO:0005622 // GO:0005634 // GO:0005737 // GO:0005737 // GO:0005777 // GO:0005829 // GO:0005829 // GO:0012506 // GO:0030863 // GO:0048471 // GO:0048471 // GO:0005622 // GO:0005737 // GO:0005777 // GO:0005829 // GO:0005615 // GO:0005622 // GO:0005634 // GO:0005737 // GO:0005737 // GO:0005777 // GO:0005829 // GO:0005829 // GO:0012506 // GO:0030863 // GO:0048471 // GO:0048471 // GO:0005…	extracellular space // intracellular // nucleus // cytoplasm // cytoplasm // peroxisome // cytosol // cytosol // vesicle membrane // cortical cytoskeleton // perinuclear region of cytoplasm // perinuclear region of cytoplasm // intracellular // cytoplasm // peroxisome // cytosol // extracellular space // intracellular // nucleus // cytoplasm // cytoplasm // peroxisome // cytosol // cytosol // ves…	not recorded // not recorded // not recorded // inferred from direct assay // not recorded // not recorded // not recorded // traceable author statement // not recorded // inferred from direct assay // inferred from direct assay // not recorded // inferred from electronic annotation // inferred from electronic annotation // inferred from electronic annotation // inferred from electronic annotatio…	GO:0003958 // GO:0004517 // GO:0004517 // GO:0005102 // GO:0005506 // GO:0005515 // GO:0005516 // GO:0008603 // GO:0010181 // GO:0016491 // GO:0019901 // GO:0020037 // GO:0034617 // GO:0034618 // GO:0042803 // GO:0042803 // GO:0046872 // GO:0050660 // GO:0050661 // GO:0051879 // GO:0003958 // GO:0004517 // GO:0005102 // GO:0005516 // GO:0010181 // GO:0020037 // GO:0050660 // GO:0003958 // GO:0004…	NADPH-hemoprotein reductase activity // nitric-oxide synthase activity // nitric-oxide synthase activity // receptor binding // iron ion binding // protein binding // calmodulin binding // cAMP-dependent protein kinase regulator activity // FMN binding // oxidoreductase activity // protein kinase binding // heme binding // tetrahydrobiopterin binding // arginine binding // protein homodimerizatio…	not recorded // inferred from direct assay // not recorded // not recorded // inferred from electronic annotation // inferred from physical interaction // traceable author statement // not recorded // inferred from direct assay // inferred from electronic annotation // not recorded // inferred from direct assay // inferred from direct assay // inferred from direct assay // inferred from direct as…	---	---	Pfam // Pfam // Pfam // Pfam	IPR001433 // IPR003097 // IPR004030 // IPR008254	Oxidoreductase FAD/NAD(P)-binding // FAD-binding, type 1 // Nitric oxide synthase, oxygenase domain // Flavodoxin/nitric oxide synthase	main					10.4444	10.2088	9.85278	4.73098	4.72753	4.86077
TC1900000502.mm.1	I830012O16Rik	RIKEN cDNA I830012O16 gene // RIKEN cDNA I830012O16 gene // ---	Coding	< 1e-07	< 1e-07	583.79	13.98	41.77	up	NM_001005858 // ENSMUST00000076249 // uc008hgq.1 // uc008hgr.1 // OTTMUST00000040266	RefSeq // ENSEMBL // UCSC Genes // UCSC Genes // Havana transcript	Mus musculus RIKEN cDNA I830012O16 gene (I830012O16Rik), mRNA. // cdna:novel chromosome:GRCm38:19:34607970:34613401:1 gene:ENSMUSG00000062488 gene_biotype:protein_coding transcript_biotype:protein_coding // RIKEN cDNA I830012O16 gene (I830012O16Rik), mRNA. // RIKEN cDNA I830012O16 gene // novel protein similar to interferon-induced protein with tetratricopeptide repeats 3 Ifit3	chr19	+	34607933	34613401	GO:0008150 // GO:0035457 // GO:0008150 // GO:0035457 // GO:0008285 // GO:0009615 // GO:0035458 // GO:0035634 // GO:0043066 // GO:0045087 // GO:0051607	biological_process // cellular response to interferon-alpha // biological_process // cellular response to interferon-alpha // negative regulation of cell proliferation // response to virus // cellular response to interferon-beta // response to stilbenoid // negative regulation of apoptotic process // innate immune response // defense response to virus	no biological data available // inferred from electronic annotation // no biological data available // inferred from electronic annotation // inferred from sequence or structural similarity // inferred from sequence or structural similarity // inferred from direct assay // inferred from expression pattern // inferred from sequence or structural similarity // inferred from electronic annotation //…	GO:0005737 // GO:0005739 // GO:0005737 // GO:0005739 // GO:0005575 // GO:0005737 // GO:0005737 // GO:0005739 // GO:0005739	cytoplasm // mitochondrion // cytoplasm // mitochondrion // cellular_component // cytoplasm // cytoplasm // mitochondrion // mitochondrion	not recorded // not recorded // not recorded // not recorded // no biological data available // inferred from electronic annotation // inferred from sequence or structural similarity // inferred from electronic annotation // inferred from sequence or structural similarity	GO:0042802 // GO:0042802 // GO:0005515 // GO:0003674 // GO:0005515	identical protein binding // identical protein binding // protein binding // molecular_function // protein binding	not recorded // not recorded // inferred from electronic annotation // no biological data available // inferred from physical interaction	---	---	---	---	---	main			NONMMUT034527 8838bp;		9.30257	9.23653	9.06103	3.83089	3.66073	3.97102
TC0100003888.mm.1	Ifi204	interferon activated gene 204 // interferon activated gene 204 // interferon activated gene 204 // ---	Coding	< 1e-07	< 1e-07	618.24	15.37	40.22	up	NM_008329 // ENSMUST00000111214 // uc007drv.1 // OTTMUST00000085571	RefSeq // ENSEMBL // UCSC Genes // Havana transcript	Mus musculus interferon activated gene 204 (Ifi204), mRNA. // cdna:novel chromosome:GRCm38:1:173747293:173766876:-1 gene:ENSMUSG00000073489 gene_biotype:protein_coding transcript_biotype:protein_coding // interferon activated gene 204 // interferon activated gene 204	chr1	-	173747293	173766919	GO:0006357 // GO:0035458 // GO:0042771 // GO:0045669 // GO:0048839 // GO:0006351 // GO:0006355 // GO:0007275 // GO:0035457 // GO:0006357 // GO:0035458 // GO:0042771 // GO:0045669 // GO:0048839 // GO:0006351 // GO:0006355 // GO:0007275 // GO:0035457	regulation of transcription from RNA polymerase II promoter // cellular response to interferon-beta // intrinsic apoptotic signaling pathway in response to DNA damage by p53 class mediator // positive regulation of osteoblast differentiation // inner ear development // transcription, DNA-dependent // regulation of transcription, DNA-dependent // multicellular organismal development // cellular re…	inferred from direct assay // inferred from direct assay // not recorded // inferred from genetic interaction // inferred from direct assay // inferred from electronic annotation // inferred from electronic annotation // inferred from electronic annotation // inferred from direct assay // inferred from direct assay // inferred from direct assay // not recorded // inferred from genetic interaction…	GO:0005634 // GO:0005654 // GO:0005730 // GO:0016607 // GO:0005634 // GO:0005730 // GO:0005730 // GO:0005737 // GO:0042405 // GO:0005634 // GO:0005654 // GO:0005730 // GO:0016607 // GO:0005634 // GO:0005730 // GO:0005730 // GO:0005737 // GO:0042405	nucleus // nucleoplasm // nucleolus // nuclear speck // nucleus // nucleolus // nucleolus // cytoplasm // nuclear inclusion body // nucleus // nucleoplasm // nucleolus // nuclear speck // nucleus // nucleolus // nucleolus // cytoplasm // nuclear inclusion body	not recorded // not recorded // not recorded // not recorded // inferred from electronic annotation // inferred from direct assay // inferred from electronic annotation // inferred from electronic annotation // inferred from direct assay // not recorded // not recorded // not recorded // not recorded // inferred from electronic annotation // inferred from direct assay // inferred from electronic …	GO:0003690 // GO:0003712 // GO:0005515 // GO:0003690 // GO:0003712 // GO:0005515	double-stranded DNA binding // transcription cofactor activity // protein binding // double-stranded DNA binding // transcription cofactor activity // protein binding	inferred from direct assay // inferred from genetic interaction // inferred from physical interaction // inferred from direct assay // inferred from genetic interaction // inferred from physical interaction	---	---	Pfam // Pfam	IPR004020 // IPR004021	DAPIN domain // HIN-200/IF120x	main	XM_003084464 8918bp;			NONMMUT003876	9.49506	9.4279	8.9253	4.02068	4.07706	3.77639
TC1700002816.mm.1	Cfb	complement factor B // complement factor B // complement factor B // complement factor B // complement factor B // complement factor B // complement factor B // complement factor B // complement component 2 (within H-2S) // complement factor B // complement factor B // complement factor B // complement factor B // --- // --- // --- // --- // --- // ---	Coding	< 1e-07	< 1e-07	1285.74	33.94	37.88	up	NM_001142706 // NM_008198 // ENSMUST00000141295 // ENSMUST00000128767 // ENSMUST00000154526 // ENSMUST00000025229 // ENSMUST00000176203 // ENSMUST00000153400 // ENSMUST00000176332 // ENSMUST00000133127 // uc012aqq.1 // uc008cdy.2 // BC005451 // OTTMUST00000085842 // OTTMUST00000085838 // OTTMUST00000085839 // OTTMUST00000085841 // OTTMUST00000110532 // OTTMUST00000085840	RefSeq // RefSeq // ENSEMBL // ENSEMBL // ENSEMBL // ENSEMBL // ENSEMBL // ENSEMBL // ENSEMBL // ENSEMBL // UCSC Genes // UCSC Genes // GenBank // Havana transcript // Havana transcript // Havana transcript // Havana transcript // Havana transcript // Havana transcript	Mus musculus complement factor B (Cfb), transcript variant 2, mRNA. // Mus musculus complement factor B (Cfb), transcript variant 1, mRNA. // cdna:putative chromosome:GRCm38:17:34856374:34859025:-1 gene:ENSMUSG00000090231 gene_biotype:protein_coding transcript_biotype:protein_coding // cdna:known chromosome:GRCm38:17:34856374:34862518:-1 gene:ENSMUSG00000090231 gene_biotype:protein_coding transcr…	chr17	-	34856374	34862518	GO:0006508 // GO:0006956 // GO:0006957 // GO:0006957 // GO:0008283 // GO:0045087 // GO:0006956 // GO:0006957 // GO:0006508 // GO:0006956 // GO:0006957 // GO:0006957 // GO:0008283 // GO:0045087 // GO:0006956 // GO:0006957 // GO:0006508 // GO:0006956 // GO:0006957 // GO:0006957 // GO:0008283 // GO:0045087 // GO:0006956 // GO:0006957 // GO:0006508 // GO:0006956 // GO:0006957 // GO:0006957 // GO:0008…	proteolysis // complement activation // complement activation, alternative pathway // complement activation, alternative pathway // cell proliferation // innate immune response // complement activation // complement activation, alternative pathway // proteolysis // complement activation // complement activation, alternative pathway // complement activation, alternative pathway // cell proliferati…	inferred from electronic annotation // not recorded // inferred from mutant phenotype // traceable author statement // traceable author statement // inferred from electronic annotation // inferred from electronic annotation // inferred from electronic annotation // inferred from electronic annotation // not recorded // inferred from mutant phenotype // traceable author statement // traceable auth…	GO:0005576 // GO:0005615 // GO:0005576 // GO:0005615 // GO:0005576 // GO:0005615 // GO:0005576 // GO:0005615 // GO:0005576 // GO:0005615 // GO:0005576 // GO:0005615 // GO:0005576 // GO:0005615 // GO:0005576 // GO:0005615 // GO:0005576 // GO:0005576 // GO:0005615 // GO:0005576 // GO:0005615	extracellular region // extracellular space // extracellular region // extracellular space // extracellular region // extracellular space // extracellular region // extracellular space // extracellular region // extracellular space // extracellular region // extracellular space // extracellular region // extracellular space // extracellular region // extracellular space // extracellular region //…	inferred from electronic annotation // not recorded // inferred from electronic annotation // not recorded // inferred from electronic annotation // not recorded // inferred from electronic annotation // not recorded // inferred from electronic annotation // not recorded // inferred from electronic annotation // not recorded // inferred from electronic annotation // not recorded // inferred from …	GO:0003824 // GO:0004252 // GO:0008233 // GO:0008236 // GO:0016787 // GO:0003824 // GO:0004252 // GO:0008233 // GO:0008236 // GO:0016787 // GO:0003824 // GO:0004252 // GO:0008233 // GO:0008236 // GO:0016787 // GO:0003824 // GO:0004252 // GO:0008233 // GO:0008236 // GO:0016787 // GO:0005515 // GO:0003824 // GO:0004252 // GO:0008233 // GO:0008236 // GO:0016787 // GO:0005515 // GO:0003824 // GO:0004…	catalytic activity // serine-type endopeptidase activity // peptidase activity // serine-type peptidase activity // hydrolase activity // catalytic activity // serine-type endopeptidase activity // peptidase activity // serine-type peptidase activity // hydrolase activity // catalytic activity // serine-type endopeptidase activity // peptidase activity // serine-type peptidase activity // hydrola…	inferred from electronic annotation // inferred from electronic annotation // inferred from electronic annotation // inferred from electronic annotation // inferred from electronic annotation // inferred from electronic annotation // inferred from electronic annotation // inferred from electronic annotation // inferred from electronic annotation // inferred from electronic annotation // inferred …	GenMAPP // GenMAPP // GenMAPP // GenMAPP // GenMAPP // GenMAPP // GenMAPP // GenMAPP // GenMAPP // GenMAPP // GenMAPP	mRNA_processing_binding_Reactome // mRNA_processing_binding_Reactome // mRNA_processing_binding_Reactome // mRNA_processing_binding_Reactome // mRNA_processing_binding_Reactome // mRNA_processing_binding_Reactome // mRNA_processing_binding_Reactome // mRNA_processing_binding_Reactome // Complement_Activation_Classical // mRNA_processing_binding_Reactome // mRNA_processing_binding_Reactome	Pfam // Pfam // Pfam // Pfam // Pfam // Pfam // Pfam // Pfam // Pfam // Pfam // Pfam // Pfam // Pfam // Pfam // Pfam // Pfam // Pfam	IPR001254 // IPR015420 // IPR000436 // IPR001254 // IPR002035 // IPR000436 // IPR001254 // IPR002035 // IPR000436 // IPR001254 // IPR002035 // IPR000436 // IPR001254 // IPR002035 // IPR001254 // IPR001254 // IPR002035	Peptidase S1 // Peptidase S1A, nudel // Sushi/SCR/CCP // Peptidase S1 // von Willebrand factor, type A // Sushi/SCR/CCP // Peptidase S1 // von Willebrand factor, type A // Sushi/SCR/CCP // Peptidase S1 // von Willebrand factor, type A // Sushi/SCR/CCP // Peptidase S1 // von Willebrand factor, type A // Peptidase S1 // Peptidase S1 // von Willebrand factor, type A	main		NR_105938	NONMMUT029343 6164bp;	NONMMUT029347	10.4103	10.3505	10.2566	5.01666	5.15308	5.13295
TC1100000989.mm.1	Xaf1	XIAP associated factor 1 // XIAP associated factor 1 // XIAP associated factor 1 // XIAP associated factor 1 // XIAP associated factor 1 // XIAP associated factor 1 // XIAP associated factor 1 // XIAP associated factor 1 (Xaf1), mRNA. // XIAP associated factor 1 // --- // --- // --- // --- // ---	Coding	< 1e-07	< 1e-07	976.72	26.84	36.39	up	NM_001037713 // ENSMUST00000151440 // ENSMUST00000146233 // ENSMUST00000140842 // ENSMUST00000094041 // ENSMUST00000142921 // uc007jyr.2 // uc007jyq.2 // uc011xyi.1 // BC153050 // OTTMUST00000013800 // OTTMUST00000013799 // OTTMUST00000084527 // OTTMUST00000013801 // OTTMUST00000013802	RefSeq // ENSEMBL // ENSEMBL // ENSEMBL // ENSEMBL // ENSEMBL // UCSC Genes // UCSC Genes // UCSC Genes // GenBank // Havana transcript // Havana transcript // Havana transcript // Havana transcript // Havana transcript	Mus musculus XIAP associated factor 1 (Xaf1), mRNA. // cdna:putative chromosome:GRCm38:11:72301629:72309061:1 gene:ENSMUSG00000040483 gene_biotype:protein_coding transcript_biotype:protein_coding // cdna:known chromosome:GRCm38:11:72301630:72313733:1 gene:ENSMUSG00000040483 gene_biotype:protein_coding transcript_biotype:protein_coding // cdna:novel chromosome:GRCm38:11:72301639:72312081:1 gene:EN…	chr11	+	72301629	72313733	GO:0006915 // GO:0031333 // GO:0035456 // GO:0035456 // GO:0006915 // GO:0031333 // GO:0035456 // GO:0006915 // GO:0031333 // GO:0035456 // GO:0035456 // GO:0006915 // GO:0031333 // GO:0035456 // GO:0035456 // GO:0006915 // GO:0031333 // GO:0035456 // GO:0006915 // GO:0031333 // GO:0035456	apoptotic process // negative regulation of protein complex assembly // response to interferon-beta // response to interferon-beta // apoptotic process // negative regulation of protein complex assembly // response to interferon-beta // apoptotic process // negative regulation of protein complex assembly // response to interferon-beta // response to interferon-beta // apoptotic process // negativ…	inferred from electronic annotation // not recorded // not recorded // inferred from electronic annotation // inferred from electronic annotation // not recorded // not recorded // inferred from electronic annotation // not recorded // not recorded // inferred from electronic annotation // inferred from electronic annotation // not recorded // not recorded // inferred from electronic annotation /…	GO:0005634 // GO:0005737 // GO:0005739 // GO:0005634 // GO:0005634 // GO:0005737 // GO:0005739 // GO:0005634 // GO:0005634 // GO:0005737 // GO:0005739 // GO:0005634 // GO:0005634 // GO:0005737 // GO:0005739 // GO:0005634 // GO:0005634 // GO:0005737 // GO:0005739 // GO:0005634 // GO:0005737 // GO:0005739	nucleus // cytoplasm // mitochondrion // nucleus // nucleus // cytoplasm // mitochondrion // nucleus // nucleus // cytoplasm // mitochondrion // nucleus // nucleus // cytoplasm // mitochondrion // nucleus // nucleus // cytoplasm // mitochondrion // nucleus // cytoplasm // mitochondrion	not recorded // inferred from electronic annotation // inferred from electronic annotation // inferred from electronic annotation // not recorded // inferred from electronic annotation // inferred from electronic annotation // inferred from electronic annotation // not recorded // inferred from electronic annotation // inferred from electronic annotation // inferred from electronic annotation // …	GO:0046872 // GO:0046872 // GO:0046872 // GO:0046872 // GO:0046872 // GO:0046872	metal ion binding // metal ion binding // metal ion binding // metal ion binding // metal ion binding // metal ion binding	inferred from electronic annotation // inferred from electronic annotation // inferred from electronic annotation // inferred from electronic annotation // inferred from electronic annotation // inferred from electronic annotation	---	---	---	---	---	main					10.1371	9.94532	9.74519	4.53303	4.92227	4.83127
TC0600001787.mm.1	Samd9l	sterile alpha motif domain containing 9-like // sterile alpha motif domain containing 9-like // sterile alpha motif domain containing 9-like // sterile alpha motif domain containing 9-like // --- // ---	Coding	< 1e-07	< 1e-07	721.83	20.14	35.84	up	NM_010156 // ENSMUST00000120087 // ENSMUST00000183576 // uc009auy.3 // OTTMUST00000073592 // OTTMUST00000073604	RefSeq // ENSEMBL // ENSEMBL // UCSC Genes // Havana transcript // Havana transcript	Mus musculus sterile alpha motif domain containing 9-like (Samd9l), mRNA. // cdna:putative chromosome:GRCm38:6:3372257:3399571:-1 gene:ENSMUSG00000047735 gene_biotype:protein_coding transcript_biotype:protein_coding // sterile alpha motif domain containing 9-like // sterile alpha motif domain containing 9-like // sterile alpha motif domain containing 9-like // sterile alpha motif domain containin…	chr6	-	3372257	3399571	GO:0008150 // GO:0008150	biological_process // biological_process	no biological data available // no biological data available	GO:0005575 // GO:0005575	cellular_component // cellular_component	no biological data available // no biological data available	GO:0003674 // GO:0005515 // GO:0003674	molecular_function // protein binding // molecular_function	no biological data available // inferred from electronic annotation // no biological data available	---	---	---	---	---	main					9.65355	9.67351	9.1917	4.62117	4.10913	4.31293
TC1200002271.mm.1	Serpina10	serine (or cysteine) peptidase inhibitor, clade A (alpha-1 antiproteinase, antitrypsin), member 10 // serine (or cysteine) peptidase inhibitor, clade A (alpha-1 antiproteinase, antitrypsin), member 10 // serine (or cysteine) peptidase inhibitor, clade A (alpha-1 antiproteinase, antitrypsin), member 10 // serine (or cysteine) peptidase inhibitor, clade A (alpha-1 antiproteinase, antitrypsin), memb…	Coding	< 1e-07	< 1e-07	868.34	25.72	33.76	up	NM_144834 // BC018416 // ENSMUST00000044231 // uc007ovz.1 // uc011yra.1 // BC025821 // ENSMUST00000121625 // OTTMUST00000065056 // OTTMUST00000065055	RefSeq // GenBank // ENSEMBL // UCSC Genes // UCSC Genes // GenBank // ENSEMBL // Havana transcript // Havana transcript	Mus musculus serine (or cysteine) peptidase inhibitor, clade A (alpha-1 antiproteinase, antitrypsin), member 10 (Serpina10), mRNA. // Mus musculus serine (or cysteine) peptidase inhibitor, clade A (alpha-1 antiproteinase, antitrypsin), member 10, mRNA (cDNA clone MGC:25863 IMAGE:4196269), complete cds. // cdna:known chromosome:GRCm38:12:103616675:103631444:-1 gene:ENSMUSG00000061947 gene_biotype:…	chr12	-	103616675	103631444	GO:0007596 // GO:0007599 // GO:0010466 // GO:0010951 // GO:0030162 // GO:0010951 // GO:0030162 // GO:0007596 // GO:0007599 // GO:0010466 // GO:0010951 // GO:0030162 // GO:0010951 // GO:0030162 // GO:0007596 // GO:0007599 // GO:0010466 // GO:0010951 // GO:0030162 // GO:0010951 // GO:0030162 // GO:0042246 // GO:0007596 // GO:0007599 // GO:0010466 // GO:0010951 // GO:0030162 // GO:0010951 // GO:0030…	blood coagulation // hemostasis // negative regulation of peptidase activity // negative regulation of endopeptidase activity // regulation of proteolysis // negative regulation of endopeptidase activity // regulation of proteolysis // blood coagulation // hemostasis // negative regulation of peptidase activity // negative regulation of endopeptidase activity // regulation of proteolysis // negat…	inferred from electronic annotation // inferred from electronic annotation // inferred from electronic annotation // not recorded // not recorded // --- // --- // inferred from electronic annotation // inferred from electronic annotation // inferred from electronic annotation // not recorded // not recorded // --- // --- // inferred from electronic annotation // inferred from electronic annotatio…	GO:0005576 // GO:0005615 // GO:0005576 // GO:0005615 // GO:0005576 // GO:0005615 // GO:0005576 // GO:0005615 // GO:0005576 // GO:0005615	extracellular region // extracellular space // extracellular region // extracellular space // extracellular region // extracellular space // extracellular region // extracellular space // extracellular region // extracellular space	inferred from electronic annotation // inferred from electronic annotation // inferred from electronic annotation // inferred from electronic annotation // inferred from electronic annotation // inferred from electronic annotation // inferred from electronic annotation // inferred from electronic annotation // inferred from electronic annotation // inferred from electronic annotation	GO:0004867 // GO:0008201 // GO:0030414 // GO:0004867 // GO:0004867 // GO:0004867 // GO:0008201 // GO:0030414 // GO:0004867 // GO:0004867 // GO:0004867 // GO:0008201 // GO:0030414 // GO:0004867 // GO:0004867 // GO:0004867 // GO:0008201 // GO:0030414 // GO:0004867 // GO:0004867 // GO:0004867 // GO:0008201 // GO:0030414 // GO:0004867 // GO:0004867	serine-type endopeptidase inhibitor activity // heparin binding // peptidase inhibitor activity // serine-type endopeptidase inhibitor activity // serine-type endopeptidase inhibitor activity // serine-type endopeptidase inhibitor activity // heparin binding // peptidase inhibitor activity // serine-type endopeptidase inhibitor activity // serine-type endopeptidase inhibitor activity // serine-ty…	not recorded // inferred from electronic annotation // inferred from electronic annotation // --- // inferred from electronic annotation // not recorded // inferred from electronic annotation // inferred from electronic annotation // --- // inferred from electronic annotation // not recorded // inferred from electronic annotation // inferred from electronic annotation // --- // inferred from elec…	---	---	Pfam // Pfam	IPR023796 // IPR023796	Serpin domain // Serpin domain	main					9.97699	9.73327	9.60831	4.9205	4.72576	4.45602
TC1100004266.mm.1	Irgm2	immunity-related GTPase family M member 2 // immunity-related GTPase family M member 2 // immunity-related GTPase family M member 2 // immunity-related GTPase family M member 2 (Irgm2), mRNA. // ---	Coding	< 1e-07	< 1e-07	1061.68	31.76	33.43	up	NM_019440 // ENSMUST00000108836 // uc007jav.2 // uc007jau.2 // OTTMUST00000012725	RefSeq // ENSEMBL // UCSC Genes // UCSC Genes // Havana transcript	Mus musculus immunity-related GTPase family M member 2 (Irgm2), mRNA. // cdna:known chromosome:GRCm38:11:58215028:58222779:1 gene:ENSMUSG00000069874 gene_biotype:protein_coding transcript_biotype:protein_coding // immunity-related GTPase family M member 2 // immunity-related GTPase family M member 2 (Irgm2), mRNA. // immunity-related GTPase family M member 2	chr11	+	58214977	58222783	GO:0006184 // GO:0034341 // GO:0034341 // GO:0042742 // GO:0042832 // GO:0006184 // GO:0034341 // GO:0034341 // GO:0042742 // GO:0042832	GTP catabolic process // response to interferon-gamma // response to interferon-gamma // defense response to bacterium // defense response to protozoan // GTP catabolic process // response to interferon-gamma // response to interferon-gamma // defense response to bacterium // defense response to protozoan	inferred from sequence or structural similarity // inferred from direct assay // inferred from mutant phenotype // inferred from mutant phenotype // inferred from direct assay // inferred from sequence or structural similarity // inferred from direct assay // inferred from mutant phenotype // inferred from mutant phenotype // inferred from direct assay	GO:0005794 // GO:0020003 // GO:0016020 // GO:0005794 // GO:0020003 // GO:0016020	Golgi apparatus // symbiont-containing vacuole // membrane // Golgi apparatus // symbiont-containing vacuole // membrane	inferred from direct assay // inferred from direct assay // inferred from electronic annotation // inferred from direct assay // inferred from direct assay // inferred from electronic annotation	GO:0003924 // GO:0005525 // GO:0016817 // GO:0003924 // GO:0005525 // GO:0016817	GTPase activity // GTP binding // hydrolase activity, acting on acid anhydrides // GTPase activity // GTP binding // hydrolase activity, acting on acid anhydrides	inferred from sequence or structural similarity // inferred from electronic annotation // inferred from electronic annotation // inferred from sequence or structural similarity // inferred from electronic annotation // inferred from electronic annotation	---	---	Pfam	IPR007743	Interferon-inducible GTPase	main					10.0298	10.0459	10.1129	4.98028	4.89272	5.14178
TC0300001444.mm.1	Gbp5	guanylate binding protein 5 // guanylate binding protein 2b // guanylate binding protein 5 // guanylate binding protein 2b // guanylate binding protein 5 // guanylate binding protein 5 (Gbp5), mRNA. // guanylate binding protein 5 (Gbp5), mRNA. // guanylate binding protein 1 (Gbp1), mRNA. // guanylate binding protein 2b // guanylate binding protein 5 // guanylate binding protein 2b // ---	Coding	< 1e-07	< 1e-07	684.08	21.52	31.79	up	NM_153564 // NM_010259 // ENSMUST00000090127 // ENSMUST00000029936 // uc008rop.1 // uc008roq.1 // uc012cyv.1 // uc008ror.1 // uc008rox.1 // BC058555 // BC108990 // OTTMUST00000089923	RefSeq // RefSeq // ENSEMBL // ENSEMBL // UCSC Genes // UCSC Genes // UCSC Genes // UCSC Genes // UCSC Genes // GenBank // GenBank // Havana transcript	Mus musculus guanylate binding protein 5 (Gbp5), mRNA. // Mus musculus guanylate binding protein 2b (Gbp2b), mRNA. // cdna:known chromosome:GRCm38:3:142496934:142522344:1 gene:ENSMUSG00000040264 gene_biotype:protein_coding transcript_biotype:protein_coding // cdna:known chromosome:GRCm38:3:142594847:142619179:1 gene:ENSMUSG00000028269 gene_biotype:protein_coding transcript_biotype:protein_coding …	chr3	+	142496900	142619179	GO:0071346 // GO:0006184 // GO:0035458 // GO:0042832 // GO:0050830 // GO:0050830 // GO:0051607 // GO:0051856 // GO:0071346 // GO:0006184 // GO:0071346 // GO:0006184 // GO:0035458 // GO:0042832 // GO:0050830 // GO:0050830 // GO:0051607 // GO:0051856 // GO:0071346 // GO:0006184 // GO:0071346 // GO:0006184 // GO:0035458 // GO:0042832 // GO:0050830 // GO:0050830 // GO:0051607 // GO:0051856 // GO:0071…	cellular response to interferon-gamma // GTP catabolic process // cellular response to interferon-beta // defense response to protozoan // defense response to Gram-positive bacterium // defense response to Gram-positive bacterium // defense response to virus // adhesion to symbiont // cellular response to interferon-gamma // GTP catabolic process // cellular response to interferon-gamma // GTP ca…	inferred from direct assay // inferred from electronic annotation // inferred from direct assay // inferred from direct assay // inferred from direct assay // inferred from mutant phenotype // inferred from electronic annotation // inferred from direct assay // inferred from direct assay // inferred from electronic annotation // inferred from direct assay // inferred from electronic annotation //…	GO:0005737 // GO:0016020 // GO:0031410 // GO:0005576 // GO:0005737 // GO:0005794 // GO:0016020 // GO:0020005 // GO:0031410 // GO:0000139 // GO:0005737 // GO:0016020 // GO:0031410 // GO:0005576 // GO:0005737 // GO:0005794 // GO:0016020 // GO:0020005 // GO:0031410 // GO:0000139 // GO:0005737 // GO:0016020 // GO:0031410 // GO:0005576 // GO:0005737 // GO:0005794 // GO:0016020 // GO:0020005 // GO:0031…	cytoplasm // membrane // cytoplasmic vesicle // extracellular region // cytoplasm // Golgi apparatus // membrane // symbiont-containing vacuole membrane // cytoplasmic vesicle // Golgi membrane // cytoplasm // membrane // cytoplasmic vesicle // extracellular region // cytoplasm // Golgi apparatus // membrane // symbiont-containing vacuole membrane // cytoplasmic vesicle // Golgi membrane // cytop…	inferred from electronic annotation // inferred from electronic annotation // inferred from direct assay // inferred from electronic annotation // inferred from electronic annotation // inferred from electronic annotation // inferred from electronic annotation // inferred from direct assay // inferred from direct assay // inferred from electronic annotation // inferred from electronic annotation …	GO:0000166 // GO:0003924 // GO:0005525 // GO:0000166 // GO:0003924 // GO:0005525 // GO:0019002 // GO:0000166 // GO:0003924 // GO:0005525 // GO:0000166 // GO:0003924 // GO:0005525 // GO:0019002 // GO:0000166 // GO:0003924 // GO:0005525 // GO:0000166 // GO:0003924 // GO:0005525 // GO:0019002	nucleotide binding // GTPase activity // GTP binding // nucleotide binding // GTPase activity // GTP binding // GMP binding // nucleotide binding // GTPase activity // GTP binding // nucleotide binding // GTPase activity // GTP binding // GMP binding // nucleotide binding // GTPase activity // GTP binding // nucleotide binding // GTPase activity // GTP binding // GMP binding	inferred from electronic annotation // inferred from electronic annotation // inferred from electronic annotation // inferred from electronic annotation // inferred from electronic annotation // inferred from electronic annotation // inferred from direct assay // inferred from electronic annotation // inferred from electronic annotation // inferred from electronic annotation // inferred from elec…	---	---	Pfam // Pfam // Pfam // Pfam	IPR003191 // IPR015894 // IPR003191 // IPR015894	Guanylate-binding protein, C-terminal // Guanylate-binding protein, N-terminal // Guanylate-binding protein, C-terminal // Guanylate-binding protein, N-terminal	main		NONMMUT045556			9.51645	9.49956	9.27026	4.38026	4.48867	4.46164
TC1800000617.mm.1	Cd74	CD74 antigen (invariant polypeptide of major histocompatibility complex, class II antigen-associated) // CD74 antigen (invariant polypeptide of major histocompatibility complex, class II antigen-associated) // microRNA 5107 // CD74 antigen (invariant polypeptide of major histocompatibility complex, class II antigen-associated) // CD74 antigen (invariant polypeptide of major histocompatibility com…	Coding	< 1e-07	< 1e-07	931.46	30.23	30.81	up	NM_001042605 // NM_010545 // NR_039567 // ENSMUST00000050487 // ENSMUST00000097563 // ENSMUST00000167610 // ENSMUST00000175586 // uc008faz.1 // uc008fba.1 // uc029tnb.1 // BC003476 // BC096435	RefSeq // RefSeq // RefSeq // ENSEMBL // ENSEMBL // ENSEMBL // ENSEMBL // UCSC Genes // UCSC Genes // UCSC Genes // GenBank // GenBank	Mus musculus CD74 antigen (invariant polypeptide of major histocompatibility complex, class II antigen-associated) (Cd74), transcript variant 1, mRNA. // Mus musculus CD74 antigen (invariant polypeptide of major histocompatibility complex, class II antigen-associated) (Cd74), transcript variant 2, mRNA. // Mus musculus microRNA 5107 (Mir5107), microRNA. // cdna:known chromosome:GRCm38:18:60803848…	chr18	+	60803848	60812652	GO:0000187 // GO:0001516 // GO:0001961 // GO:0001961 // GO:0002606 // GO:0002792 // GO:0002821 // GO:0002830 // GO:0002906 // GO:0006461 // GO:0006886 // GO:0006886 // GO:0006952 // GO:0006955 // GO:0007165 // GO:0008283 // GO:0016064 // GO:0019882 // GO:0019882 // GO:0019886 // GO:0030890 // GO:0035691 // GO:0043066 // GO:0043066 // GO:0043518 // GO:0043518 // GO:0045059 // GO:0045060 // GO:0045…	activation of MAPK activity // prostaglandin biosynthetic process // positive regulation of cytokine-mediated signaling pathway // positive regulation of cytokine-mediated signaling pathway // positive regulation of dendritic cell antigen processing and presentation // negative regulation of peptide secretion // positive regulation of adaptive immune response // positive regulation of type 2 immu…	not recorded // not recorded // inferred from mutant phenotype // not recorded // inferred from direct assay // not recorded // non-traceable author statement // inferred from mutant phenotype // inferred from mutant phenotype // inferred from direct assay // inferred from direct assay // inferred from mutant phenotype // inferred from mutant phenotype // inferred from electronic annotation // no…	GO:0005764 // GO:0005770 // GO:0005771 // GO:0005773 // GO:0005783 // GO:0005794 // GO:0005886 // GO:0005886 // GO:0005887 // GO:0009897 // GO:0009986 // GO:0016020 // GO:0016021 // GO:0035692 // GO:0035692 // GO:0035693 // GO:0042613 // GO:0005773 // GO:0009986 // GO:0016021 // GO:0035692 // GO:0005764 // GO:0005770 // GO:0005771 // GO:0005773 // GO:0005783 // GO:0005794 // GO:0005886 // GO:0005…	lysosome // late endosome // multivesicular body // vacuole // endoplasmic reticulum // Golgi apparatus // plasma membrane // plasma membrane // integral to plasma membrane // external side of plasma membrane // cell surface // membrane // integral to membrane // macrophage migration inhibitory factor receptor complex // macrophage migration inhibitory factor receptor complex // NOS2-CD74 complex…	inferred from direct assay // inferred from direct assay // inferred from direct assay // not recorded // inferred from direct assay // inferred from direct assay // inferred from direct assay // inferred from mutant phenotype // traceable author statement // inferred from direct assay // not recorded // inferred from electronic annotation // not recorded // inferred from direct assay // not reco…	GO:0001540 // GO:0004896 // GO:0004896 // GO:0005515 // GO:0019955 // GO:0019955 // GO:0035718 // GO:0042289 // GO:0050998 // GO:0001540 // GO:0004896 // GO:0019955 // GO:0019955 // GO:0035718 // GO:0042289 // GO:0001540 // GO:0004896 // GO:0004896 // GO:0005515 // GO:0019955 // GO:0019955 // GO:0035718 // GO:0042289 // GO:0050998 // GO:0001540 // GO:0004896 // GO:0019955 // GO:0019955 // GO:0035…	beta-amyloid binding // cytokine receptor activity // cytokine receptor activity // protein binding // cytokine binding // cytokine binding // macrophage migration inhibitory factor binding // MHC class II protein binding // nitric-oxide synthase binding // beta-amyloid binding // cytokine receptor activity // cytokine binding // cytokine binding // macrophage migration inhibitory factor binding …	not recorded // inferred from mutant phenotype // not recorded // inferred from physical interaction // inferred from direct assay // not recorded // not recorded // inferred from physical interaction // inferred from physical interaction // inferred from electronic annotation // inferred from electronic annotation // inferred from electronic annotation // inferred from sequence or structural sim…	---	---	Pfam // Pfam // Pfam // Pfam // Pfam // Pfam // Pfam // Pfam	IPR011988 // IPR015386 // IPR000716 // IPR011988 // IPR015386 // IPR000716 // IPR011988 // IPR015386	MHC class II-associated invariant chain, trimerisation // MHC class II-associated invariant chain/CLIP, MHC II-interacting // Thyroglobulin type-1 // MHC class II-associated invariant chain, trimerisation // MHC class II-associated invariant chain/CLIP, MHC II-interacting // Thyroglobulin type-1 // MHC class II-associated invariant chain, trimerisation // MHC class II-associated invariant chain/C…	main					9.87609	9.98129	9.76485	4.83103	4.82082	5.14927
TC0600003108.mm.1	C1s	complement component 1, s subcomponent // complement component 1, s subcomponent // complement component 1, s subcomponent // complement component 1, s subcomponent // complement component 1, s subcomponent // complement component 1, s subcomponent // complement component 1, s subcomponent // complement component 1, s subcomponent // complement component 1, s subcomponent // complement component …	Coding	< 1e-07	< 1e-07	421.12	14.46	29.11	up	NM_144938 // NM_001097617 // ENSMUST00000160505 // ENSMUST00000162443 // ENSMUST00000159143 // ENSMUST00000159463 // ENSMUST00000162844 // uc009drb.1 // uc009drc.1 // BC022123 // BC018319 // BC111880 // OTTMUST00000088837 // OTTMUST00000088914 // OTTMUST00000088974 // OTTMUST00000088916 // OTTMUST00000088915	RefSeq // RefSeq // ENSEMBL // ENSEMBL // ENSEMBL // ENSEMBL // ENSEMBL // UCSC Genes // UCSC Genes // GenBank // GenBank // GenBank // Havana transcript // Havana transcript // Havana transcript // Havana transcript // Havana transcript	Mus musculus complement component 1, s subcomponent (C1s), transcript variant 1, mRNA. // Mus musculus complement component 1, s subcomponent (C1s), transcript variant 2, mRNA. // cdna:known chromosome:GRCm38:6:124530345:124542321:-1 gene:ENSMUSG00000038521 gene_biotype:protein_coding transcript_biotype:protein_coding // cdna:known chromosome:GRCm38:6:124530348:124542359:-1 gene:ENSMUSG0000003852…	chr6	-	124530344	124542359	GO:0006508 // GO:0006956 // GO:0006958 // GO:0045087 // GO:0006508 // GO:0006956 // GO:0006958 // GO:0045087 // GO:0006508 // GO:0006956 // GO:0006958 // GO:0045087 // GO:0006508 // GO:0006956 // GO:0006958 // GO:0045087 // GO:0006508 // GO:0006956 // GO:0006958 // GO:0045087 // GO:0006508 // GO:0006956 // GO:0006958 // GO:0045087 // GO:0006508 // GO:0006956 // GO:0006958 // GO:0045087 // GO:0006…	proteolysis // complement activation // complement activation, classical pathway // innate immune response // proteolysis // complement activation // complement activation, classical pathway // innate immune response // proteolysis // complement activation // complement activation, classical pathway // innate immune response // proteolysis // complement activation // complement activation, classi…	inferred from electronic annotation // inferred from electronic annotation // inferred from electronic annotation // inferred from electronic annotation // inferred from electronic annotation // inferred from electronic annotation // inferred from electronic annotation // inferred from electronic annotation // inferred from electronic annotation // inferred from electronic annotation // inferred …	GO:0005576 // GO:0005576 // GO:0005576 // GO:0005576 // GO:0005576 // GO:0005576 // GO:0005576 // GO:0005576 // GO:0005576 // GO:0005576 // GO:0005576 // GO:0005576 // GO:0005576 // GO:0005576 // GO:0005576 // GO:0005576 // GO:0005576 // GO:0005576 // GO:0005576 // GO:0005576	extracellular region // extracellular region // extracellular region // extracellular region // extracellular region // extracellular region // extracellular region // extracellular region // extracellular region // extracellular region // extracellular region // extracellular region // extracellular region // extracellular region // extracellular region // extracellular region // extracellular r…	not recorded // inferred from electronic annotation // not recorded // inferred from electronic annotation // not recorded // inferred from electronic annotation // not recorded // inferred from electronic annotation // not recorded // inferred from electronic annotation // not recorded // inferred from electronic annotation // not recorded // inferred from electronic annotation // not recorded /…	GO:0003824 // GO:0004252 // GO:0005509 // GO:0008233 // GO:0008236 // GO:0016787 // GO:0042802 // GO:0046872 // GO:0004252 // GO:0003824 // GO:0004252 // GO:0005509 // GO:0008233 // GO:0008236 // GO:0016787 // GO:0042802 // GO:0046872 // GO:0004252 // GO:0003824 // GO:0004252 // GO:0005509 // GO:0008233 // GO:0008236 // GO:0016787 // GO:0042802 // GO:0046872 // GO:0004252 // GO:0003824 // GO:0004…	catalytic activity // serine-type endopeptidase activity // calcium ion binding // peptidase activity // serine-type peptidase activity // hydrolase activity // identical protein binding // metal ion binding // serine-type endopeptidase activity // catalytic activity // serine-type endopeptidase activity // calcium ion binding // peptidase activity // serine-type peptidase activity // hydrolase a…	inferred from electronic annotation // not recorded // inferred from electronic annotation // inferred from electronic annotation // inferred from electronic annotation // inferred from electronic annotation // not recorded // inferred from electronic annotation // inferred from electronic annotation // inferred from electronic annotation // not recorded // inferred from electronic annotation // …	---	---	Pfam // Pfam // Pfam // Pfam // Pfam // Pfam // Pfam // Pfam // Pfam	IPR000436 // IPR000859 // IPR001254 // IPR001881 // IPR000436 // IPR000859 // IPR001254 // IPR001881 // IPR000859	Sushi/SCR/CCP // CUB domain // Peptidase S1 // EGF-like calcium-binding // Sushi/SCR/CCP // CUB domain // Peptidase S1 // EGF-like calcium-binding // CUB domain	main				NONMMUT058777	8.97412	8.83581	8.3765	3.79988	3.90327	3.90785
TC1300002715.mm.1	Itga2	integrin alpha 2 // integrin alpha 2 // integrin alpha 2 // integrin alpha 2	Coding	< 1e-07	< 1e-07	559.12	19.64	28.47	up	NM_008396 // ENSMUST00000056117 // uc007rxw.1 // BC065139	RefSeq // ENSEMBL // UCSC Genes // GenBank	Mus musculus integrin alpha 2 (Itga2), mRNA. // cdna:known chromosome:GRCm38:13:114835916:114932041:-1 gene:ENSMUSG00000015533 gene_biotype:protein_coding transcript_biotype:protein_coding // integrin alpha 2 // Mus musculus integrin alpha 2, mRNA (cDNA clone MGC:85997 IMAGE:30619401), complete cds.	chr13	-	114835912	114932041	GO:0001894 // GO:0002687 // GO:0006971 // GO:0007155 // GO:0007229 // GO:0010634 // GO:0010694 // GO:0014911 // GO:0031346 // GO:0032967 // GO:0033343 // GO:0043388 // GO:0043589 // GO:0045184 // GO:0045727 // GO:0045785 // GO:0045987 // GO:0048661 // GO:0050729 // GO:0050927 // GO:0050966 // GO:0051971 // GO:0060100 // GO:0001894 // GO:0002687 // GO:0006971 // GO:0007155 // GO:0007229 // GO:0010…	tissue homeostasis // positive regulation of leukocyte migration // hypotonic response // cell adhesion // integrin-mediated signaling pathway // positive regulation of epithelial cell migration // positive regulation of alkaline phosphatase activity // positive regulation of smooth muscle cell migration // positive regulation of cell projection organization // positive regulation of collagen bio…	not recorded // not recorded // not recorded // inferred from electronic annotation // inferred from electronic annotation // not recorded // not recorded // not recorded // not recorded // not recorded // not recorded // not recorded // not recorded // not recorded // not recorded // not recorded // not recorded // not recorded // not recorded // not recorded // not recorded // not recorded // n…	GO:0005634 // GO:0005886 // GO:0005925 // GO:0008305 // GO:0009279 // GO:0009897 // GO:0009986 // GO:0016020 // GO:0016021 // GO:0030424 // GO:0042995 // GO:0043679 // GO:0045178 // GO:0048471 // GO:0005886 // GO:0005634 // GO:0005886 // GO:0005925 // GO:0008305 // GO:0009279 // GO:0009897 // GO:0009986 // GO:0016020 // GO:0016021 // GO:0030424 // GO:0042995 // GO:0043679 // GO:0045178 // GO:0048…	nucleus // plasma membrane // focal adhesion // integrin complex // cell outer membrane // external side of plasma membrane // cell surface // membrane // integral to membrane // axon // cell projection // axon terminus // basal part of cell // perinuclear region of cytoplasm // plasma membrane // nucleus // plasma membrane // focal adhesion // integrin complex // cell outer membrane // external …	not recorded // not recorded // not recorded // inferred from electronic annotation // not recorded // inferred from direct assay // not recorded // inferred from electronic annotation // inferred from electronic annotation // not recorded // not recorded // not recorded // inferred from direct assay // not recorded // traceable author statement // not recorded // not recorded // not recorded // …	GO:0005178 // GO:0032403 // GO:0043236 // GO:0046872 // GO:0046982 // GO:0005178 // GO:0032403 // GO:0043236 // GO:0046872 // GO:0046982 // GO:0005515 // GO:0005178 // GO:0032403 // GO:0043236 // GO:0046872 // GO:0046982	integrin binding // protein complex binding // laminin binding // metal ion binding // protein heterodimerization activity // integrin binding // protein complex binding // laminin binding // metal ion binding // protein heterodimerization activity // protein binding // integrin binding // protein complex binding // laminin binding // metal ion binding // protein heterodimerization activity	not recorded // not recorded // not recorded // inferred from electronic annotation // not recorded // not recorded // not recorded // not recorded // inferred from electronic annotation // not recorded // inferred from electronic annotation // not recorded // not recorded // not recorded // inferred from electronic annotation // not recorded	GenMAPP // GenMAPP // GenMAPP	Integrin-mediated_cell_adhesion_KEGG // Integrin-mediated_cell_adhesion_KEGG // Integrin-mediated_cell_adhesion_KEGG	Pfam // Pfam // Pfam // Pfam	IPR002035 // IPR013517 // IPR013649 // IPR018184	von Willebrand factor, type A // FG-GAP repeat // Integrin alpha-2 // Integrin alpha chain, C-terminal cytoplasmic region, conserved site	main			NONMMUT019423 217bp;		9.07351	9.29596	9.0438	4.42801	4.36207	4.1451
TC0500003175.mm.1	Oas2	2-5 oligoadenylate synthetase 2 // 2-5 oligoadenylate synthetase 2 // 2-5 oligoadenylate synthetase 2 // 2-5 oligoadenylate synthetase 2 // 2-5 oligoadenylate synthetase 2 // 2'-5' oligoadenylate synthetase 2 (Oas2), mRNA. // 2'-5' oligoadenylate synthetase 2 // 2'-5' oligoadenylate synthetase 2 // 2'-5' oligoadenylate synthetase 2 (Oas2), mRNA. // --- // --- // --- // ---	Coding	< 1e-07	< 1e-07	486.65	18.38	26.48	up	NM_145227 // ENSMUST00000053909 // ENSMUST00000081491 // ENSMUST00000147941 // ENSMUST00000146101 // uc008zhv.2 // uc008zhx.2 // uc008zhw.2 // uc008zhy.1 // OTTMUST00000062394 // OTTMUST00000062395 // OTTMUST00000062397 // OTTMUST00000062396	RefSeq // ENSEMBL // ENSEMBL // ENSEMBL // ENSEMBL // UCSC Genes // UCSC Genes // UCSC Genes // UCSC Genes // Havana transcript // Havana transcript // Havana transcript // Havana transcript	Mus musculus 2-5 oligoadenylate synthetase 2 (Oas2), mRNA. // cdna:novel chromosome:GRCm38:5:120730333:120749853:-1 gene:ENSMUSG00000032690 gene_biotype:protein_coding transcript_biotype:protein_coding // cdna:known chromosome:GRCm38:5:120730334:120749853:-1 gene:ENSMUSG00000032690 gene_biotype:protein_coding transcript_biotype:protein_coding // cdna:known chromosome:GRCm38:5:120730336:120735575:…	chr5	-	120730333	120749853	GO:0006164 // GO:0006401 // GO:0006486 // GO:0006955 // GO:0009615 // GO:0018377 // GO:0045087 // GO:0051607 // GO:0006164 // GO:0006486 // GO:0006486 // GO:0018377 // GO:0018377 // GO:0006164 // GO:0006164 // GO:0006401 // GO:0006486 // GO:0006955 // GO:0009615 // GO:0018377 // GO:0045087 // GO:0051607 // GO:0006164 // GO:0006486 // GO:0006486 // GO:0018377 // GO:0018377 // GO:0006164 // GO:0006…	purine nucleotide biosynthetic process // RNA catabolic process // protein glycosylation // immune response // response to virus // protein myristoylation // innate immune response // defense response to virus // purine nucleotide biosynthetic process // protein glycosylation // protein glycosylation // protein myristoylation // protein myristoylation // purine nucleotide biosynthetic process // …	not recorded // inferred from direct assay // not recorded // inferred from electronic annotation // traceable author statement // not recorded // inferred from electronic annotation // inferred from electronic annotation // inferred from electronic annotation // inferred from electronic annotation // inferred from sequence or structural similarity // inferred from electronic annotation // inferr…	GO:0005634 // GO:0005737 // GO:0005739 // GO:0005783 // GO:0043231 // GO:0048471 // GO:0005737 // GO:0048471 // GO:0048471 // GO:0005634 // GO:0005737 // GO:0005739 // GO:0005783 // GO:0043231 // GO:0048471 // GO:0005737 // GO:0048471 // GO:0048471 // GO:0005634 // GO:0005737 // GO:0005739 // GO:0005783 // GO:0043231 // GO:0048471 // GO:0048471 // GO:0005737 // GO:0048471 // GO:0005634 // GO:0005…	nucleus // cytoplasm // mitochondrion // endoplasmic reticulum // intracellular membrane-bounded organelle // perinuclear region of cytoplasm // cytoplasm // perinuclear region of cytoplasm // perinuclear region of cytoplasm // nucleus // cytoplasm // mitochondrion // endoplasmic reticulum // intracellular membrane-bounded organelle // perinuclear region of cytoplasm // cytoplasm // perinuclear r…	inferred from electronic annotation // not recorded // inferred from electronic annotation // inferred from electronic annotation // inferred from electronic annotation // not recorded // inferred from electronic annotation // inferred from electronic annotation // inferred from sequence or structural similarity // inferred from electronic annotation // not recorded // inferred from electronic an…	GO:0000166 // GO:0001730 // GO:0001730 // GO:0003723 // GO:0003725 // GO:0003725 // GO:0005524 // GO:0008270 // GO:0016740 // GO:0016779 // GO:0046872 // GO:0001730 // GO:0003725 // GO:0005524 // GO:0005524 // GO:0008270 // GO:0000166 // GO:0001730 // GO:0001730 // GO:0003723 // GO:0003725 // GO:0003725 // GO:0005524 // GO:0008270 // GO:0016740 // GO:0016779 // GO:0046872 // GO:0001730 // GO:0003…	nucleotide binding // 2'-5'-oligoadenylate synthetase activity // 2'-5'-oligoadenylate synthetase activity // RNA binding // double-stranded RNA binding // double-stranded RNA binding // ATP binding // zinc ion binding // transferase activity // nucleotidyltransferase activity // metal ion binding // 2'-5'-oligoadenylate synthetase activity // double-stranded RNA binding // ATP binding // ATP bin…	inferred from electronic annotation // inferred from direct assay // not recorded // inferred from electronic annotation // inferred from direct assay // not recorded // not recorded // not recorded // inferred from electronic annotation // inferred from electronic annotation // inferred from electronic annotation // inferred from electronic annotation // inferred from electronic annotation // in…	---	---	Pfam // Pfam // Pfam // Pfam // Pfam	IPR002934 // IPR018952 // IPR002934 // IPR018952 // IPR018952	Nucleotidyl transferase domain // 2'-5'-oligoadenylate synthetase 1, domain 2/C-terminal // Nucleotidyl transferase domain // 2'-5'-oligoadenylate synthetase 1, domain 2/C-terminal // 2'-5'-oligoadenylate synthetase 1, domain 2/C-terminal	main				NONMMUT054265	9.02091	8.91456	8.87696	4.16183	4.28858	4.19657
TC0800002431.mm.1	Bst2	bone marrow stromal cell antigen 2 // bone marrow stromal cell antigen 2 // bone marrow stromal cell antigen 2 // bone marrow stromal cell antigen 2 // bone marrow stromal cell antigen 2 // bone marrow stromal cell antigen 2	Coding	< 1e-07	< 1e-07	1387.43	54.84	25.3	up	NM_198095 // ENSMUST00000051672 // uc009mdr.1 // BC087949 // BC056638 // BC027328	RefSeq // ENSEMBL // UCSC Genes // GenBank // GenBank // GenBank	Mus musculus bone marrow stromal cell antigen 2 (Bst2), mRNA. // cdna:known chromosome:GRCm38:8:71534264:71537437:-1 gene:ENSMUSG00000046718 gene_biotype:protein_coding transcript_biotype:protein_coding // bone marrow stromal cell antigen 2 // Mus musculus bone marrow stromal cell antigen 2, mRNA (cDNA clone MGC:107564 IMAGE:6768735), complete cds. // Mus musculus bone marrow stromal cell antigen…	chr8	-	71534256	71537437	GO:0002737 // GO:0007165 // GO:0009615 // GO:0009615 // GO:0030308 // GO:0030336 // GO:0032956 // GO:0034341 // GO:0035455 // GO:0035456 // GO:0043123 // GO:0045071 // GO:0045071 // GO:0045087 // GO:0045087 // GO:0051607 // GO:1901253 // GO:1901253 // GO:1901253 // GO:0002737 // GO:0002737 // GO:0007165 // GO:0009615 // GO:0030308 // GO:0030308 // GO:0030336 // GO:0030336 // GO:0032956 // GO:0043…	negative regulation of plasmacytoid dendritic cell cytokine production // signal transduction // response to virus // response to virus // negative regulation of cell growth // negative regulation of cell migration // regulation of actin cytoskeleton organization // response to interferon-gamma // response to interferon-alpha // response to interferon-beta // positive regulation of I-kappaB kinas…	not recorded // not recorded // inferred from direct assay // not recorded // not recorded // not recorded // not recorded // inferred from direct assay // inferred from direct assay // inferred from direct assay // not recorded // inferred from mutant phenotype // not recorded // inferred from mutant phenotype // not recorded // not recorded // inferred from direct assay // inferred from mutant …	GO:0005622 // GO:0005737 // GO:0005768 // GO:0005794 // GO:0005886 // GO:0009986 // GO:0009986 // GO:0016020 // GO:0016021 // GO:0016324 // GO:0031225 // GO:0044459 // GO:0005737 // GO:0005737 // GO:0005770 // GO:0005886 // GO:0005886 // GO:0016324 // GO:0016324 // GO:0045121 // GO:0005622 // GO:0005737 // GO:0005768 // GO:0005794 // GO:0005886 // GO:0009986 // GO:0009986 // GO:0016020 // GO:0016…	intracellular // cytoplasm // endosome // Golgi apparatus // plasma membrane // cell surface // cell surface // membrane // integral to membrane // apical plasma membrane // anchored to membrane // plasma membrane part // cytoplasm // cytoplasm // late endosome // plasma membrane // plasma membrane // apical plasma membrane // apical plasma membrane // membrane raft // intracellular // cytoplasm …	not recorded // not recorded // inferred from electronic annotation // inferred from electronic annotation // not recorded // inferred from direct assay // not recorded // inferred from electronic annotation // inferred from electronic annotation // not recorded // inferred from electronic annotation // not recorded // inferred from electronic annotation // inferred from sequence or structural si…	GO:0004871 // GO:0008191 // GO:0042803 // GO:0004871 // GO:0008191 // GO:0008191 // GO:0042803 // GO:0004871 // GO:0008191 // GO:0042803 // GO:0005515 // GO:0004871 // GO:0008191 // GO:0008191 // GO:0042803 // GO:0004871 // GO:0008191 // GO:0042803 // GO:0004871 // GO:0008191 // GO:0008191 // GO:0042803 // GO:0004871 // GO:0008191 // GO:0042803 // GO:0004871 // GO:0008191 // GO:0008191 // GO:0042…	signal transducer activity // metalloendopeptidase inhibitor activity // protein homodimerization activity // signal transducer activity // metalloendopeptidase inhibitor activity // metalloendopeptidase inhibitor activity // protein homodimerization activity // signal transducer activity // metalloendopeptidase inhibitor activity // protein homodimerization activity // protein binding // signal …	not recorded // not recorded // not recorded // inferred from electronic annotation // inferred from electronic annotation // inferred from sequence or structural similarity // inferred from electronic annotation // not recorded // not recorded // not recorded // inferred from electronic annotation // inferred from electronic annotation // inferred from sequence or structural similarity // inferr…	---	---	---	---	---	main					10.2498	10.4935	10.6036	5.82545	5.65282	5.90098
TC0600001424.mm.1	C1rb	complement component 1, r subcomponent B // complement component 1, r subcomponent B // complement component 1, r subcomponent B // complement component 1, r subcomponent B	Coding	< 1e-07	< 1e-07	564.33	23.09	24.44	up	NM_001113356 // ENSMUST00000184647 // uc009drd.1 // OTTMUST00000118064	RefSeq // ENSEMBL // UCSC Genes // Havana transcript	Mus musculus complement component 1, r subcomponent B (C1rb), mRNA. // complement component 1, r subcomponent B // complement component 1, r subcomponent B // complement component 1, r subcomponent B	chr6	+	124570294	124581171	GO:0006508 // GO:0006956 // GO:0006958 // GO:0045087	proteolysis // complement activation // complement activation, classical pathway // innate immune response	inferred from electronic annotation // inferred from electronic annotation // inferred from electronic annotation // inferred from electronic annotation	GO:0005576 // GO:0005575	extracellular region // cellular_component	inferred from electronic annotation // no biological data available	GO:0003824 // GO:0004252 // GO:0005509 // GO:0008233 // GO:0008236 // GO:0016787 // GO:0004252	catalytic activity // serine-type endopeptidase activity // calcium ion binding // peptidase activity // serine-type peptidase activity // hydrolase activity // serine-type endopeptidase activity	inferred from electronic annotation // not recorded // inferred from electronic annotation // inferred from electronic annotation // inferred from electronic annotation // inferred from electronic annotation // inferred from electronic annotation	GenMAPP	Complement_Activation_Classical	---	---	---	main					9.32661	9.20544	8.92137	4.38072	4.71786	4.53726
TC0500003729.mm.1	Gbp8	guanylate-binding protein 8 // guanylate-binding protein 8 // guanylate-binding protein 8 (Gbp8), mRNA. // guanylate-binding protein 8 // guanylate-binding protein 8	Coding	< 1e-07	< 1e-07	491.29	20.85	23.56	up	NM_029509 // ENSMUST00000112718 // uc008yku.1 // uc008ykv.1 // BC031475	RefSeq // ENSEMBL // UCSC Genes // UCSC Genes // GenBank	Mus musculus guanylate-binding protein 8 (Gbp8), mRNA. // cdna:known chromosome:GRCm38:5:105014927:105051047:-1 gene:ENSMUSG00000034438 gene_biotype:protein_coding transcript_biotype:protein_coding // guanylate-binding protein 8 (Gbp8), mRNA. // guanylate-binding protein 8 // Mus musculus RIKEN cDNA 5830443L24 gene, mRNA (cDNA clone MGC:27754 IMAGE:2654170), complete cds.	chr5	-	105014153	105053561	GO:0071346 // GO:0006184 // GO:0071346 // GO:0006184 // GO:0071346 // GO:0006184	cellular response to interferon-gamma // GTP catabolic process // cellular response to interferon-gamma // GTP catabolic process // cellular response to interferon-gamma // GTP catabolic process	inferred from direct assay // inferred from electronic annotation // inferred from direct assay // inferred from electronic annotation // inferred from direct assay // inferred from electronic annotation	GO:0005575 // GO:0005575 // GO:0005575	cellular_component // cellular_component // cellular_component	no biological data available // no biological data available // no biological data available	GO:0003674 // GO:0003924 // GO:0005525 // GO:0003924 // GO:0003674 // GO:0005525 // GO:0003674 // GO:0003924 // GO:0005525	molecular_function // GTPase activity // GTP binding // GTPase activity // molecular_function // GTP binding // molecular_function // GTPase activity // GTP binding	no biological data available // inferred from electronic annotation // inferred from electronic annotation // inferred from electronic annotation // no biological data available // inferred from electronic annotation // no biological data available // inferred from electronic annotation // inferred from electronic annotation	---	---	Pfam // Pfam	IPR003191 // IPR015894	Guanylate-binding protein, C-terminal // Guanylate-binding protein, N-terminal	main					9.0066	9.02821	8.81871	4.25763	4.49421	4.44237
TC0500003181.mm.1	Oas1a	2-5 oligoadenylate synthetase 1A // 2-5 oligoadenylate synthetase 1A // 2'-5' oligoadenylate synthetase 1A // 2-5 oligoadenylate synthetase 1A // 2-5 oligoadenylate synthetase 1A // ---	Coding	< 1e-07	< 1e-07	1060.98	45.59	23.27	up	NM_145211 // ENSMUST00000080322 // uc008zij.2 // BC013715 // BC057878 // OTTMUST00000066360	RefSeq // ENSEMBL // UCSC Genes // GenBank // GenBank // Havana transcript	Mus musculus 2-5 oligoadenylate synthetase 1A (Oas1a), mRNA. // cdna:known chromosome:GRCm38:5:120896256:120907521:-1 gene:ENSMUSG00000052776 gene_biotype:protein_coding transcript_biotype:protein_coding // 2'-5' oligoadenylate synthetase 1A // Mus musculus 2-5 oligoadenylate synthetase 1A, mRNA (cDNA clone MGC:6224 IMAGE:3257027), complete cds. // Mus musculus 2-5 oligoadenylate synthetase 1A, m…	chr5	-	120896256	120907525	GO:0048525 // GO:0006164 // GO:0006955 // GO:0009615 // GO:0045087 // GO:0051607 // GO:0048525 // GO:0009615 // GO:0006164 // GO:0006955 // GO:0045087 // GO:0051607 // GO:0048525 // GO:0006164 // GO:0006955 // GO:0009615 // GO:0045087 // GO:0051607 // GO:0048525 // GO:0006164 // GO:0006955 // GO:0009615 // GO:0045087 // GO:0051607	negative regulation of viral reproduction // purine nucleotide biosynthetic process // immune response // response to virus // innate immune response // defense response to virus // negative regulation of viral reproduction // response to virus // purine nucleotide biosynthetic process // immune response // innate immune response // defense response to virus // negative regulation of viral reprod…	inferred from direct assay // inferred from direct assay // inferred from electronic annotation // traceable author statement // inferred from electronic annotation // inferred from electronic annotation // inferred from direct assay // traceable author statement // inferred from direct assay // inferred from electronic annotation // inferred from electronic annotation // inferred from electronic…	GO:0005634 // GO:0005737 // GO:0005634 // GO:0005737 // GO:0005739 // GO:0005783 // GO:0043231 // GO:0005634 // GO:0005737 // GO:0005739 // GO:0005783 // GO:0005634 // GO:0005737 // GO:0043231 // GO:0005634 // GO:0005737 // GO:0005634 // GO:0005737 // GO:0005739 // GO:0005783 // GO:0043231 // GO:0005634 // GO:0005737 // GO:0005634 // GO:0005737 // GO:0005739 // GO:0005783 // GO:0043231	nucleus // cytoplasm // nucleus // cytoplasm // mitochondrion // endoplasmic reticulum // intracellular membrane-bounded organelle // nucleus // cytoplasm // mitochondrion // endoplasmic reticulum // nucleus // cytoplasm // intracellular membrane-bounded organelle // nucleus // cytoplasm // nucleus // cytoplasm // mitochondrion // endoplasmic reticulum // intracellular membrane-bounded organelle …	not recorded // not recorded // inferred from electronic annotation // inferred from electronic annotation // inferred from electronic annotation // inferred from electronic annotation // inferred from electronic annotation // not recorded // not recorded // inferred from electronic annotation // inferred from electronic annotation // inferred from electronic annotation // inferred from electroni…	GO:0001730 // GO:0001730 // GO:0003725 // GO:0003725 // GO:0005515 // GO:0008270 // GO:0000166 // GO:0003723 // GO:0003725 // GO:0005524 // GO:0016740 // GO:0016779 // GO:0046872 // GO:0001730 // GO:0001730 // GO:0003725 // GO:0003725 // GO:0005515 // GO:0008270 // GO:0003723 // GO:0046872 // GO:0005524 // GO:0016740 // GO:0016779 // GO:0000166 // GO:0003725 // GO:0001730 // GO:0001730 // GO:0003…	2'-5'-oligoadenylate synthetase activity // 2'-5'-oligoadenylate synthetase activity // double-stranded RNA binding // double-stranded RNA binding // protein binding // zinc ion binding // nucleotide binding // RNA binding // double-stranded RNA binding // ATP binding // transferase activity // nucleotidyltransferase activity // metal ion binding // 2'-5'-oligoadenylate synthetase activity // 2'-…	inferred from direct assay // not recorded // inferred from direct assay // not recorded // inferred from physical interaction // not recorded // inferred from electronic annotation // inferred from electronic annotation // inferred from electronic annotation // inferred from electronic annotation // inferred from electronic annotation // inferred from electronic annotation // inferred from elect…	GenMAPP // GenMAPP // GenMAPP // GenMAPP	mRNA_processing_binding_Reactome // mRNA_processing_binding_Reactome // mRNA_processing_binding_Reactome // mRNA_processing_binding_Reactome	Pfam // Pfam	IPR002934 // IPR018952	Nucleotidyl transferase domain // 2'-5'-oligoadenylate synthetase 1, domain 2/C-terminal	main					10.1635	10.0872	9.93506	5.58143	5.49036	5.50731
TC1400002869.mm.1	Phf11d	PHD finger protein 11D // PHD finger protein 11D // PHD finger protein 11D // PHD finger protein 11D // PHD finger protein 11D // PHD finger protein 11D // PHD finger protein 11D // PHD finger protein 11D // PHD finger protein 11D // PHD finger protein 11D // --- // --- // --- // ---	Coding	< 1e-07	< 1e-07	422.32	19.4	21.77	up	NM_199015 // ENSMUST00000095157 // ENSMUST00000161754 // BC030186 // BC145673 // uc007ueg.2 // uc007uef.2 // uc007ueh.2 // ENSMUST00000160425 // ENSMUST00000161031 // OTTMUST00000088078 // OTTMUST00000088081 // OTTMUST00000088080 // OTTMUST00000088079	RefSeq // ENSEMBL // ENSEMBL // GenBank // GenBank // UCSC Genes // UCSC Genes // UCSC Genes // ENSEMBL // ENSEMBL // Havana transcript // Havana transcript // Havana transcript // Havana transcript	Mus musculus PHD finger protein 11D (Phf11d), mRNA. // cdna:known chromosome:GRCm38:14:59347407:59365470:-1 gene:ENSMUSG00000068245 gene_biotype:protein_coding transcript_biotype:protein_coding // cdna:known chromosome:GRCm38:14:59348732:59365440:-1 gene:ENSMUSG00000068245 gene_biotype:protein_coding transcript_biotype:retained_intron // Mus musculus DNA segment, Chr 14, ERATO Doi 668, expressed,…	chr14	-	59347407	59365490	GO:0006351 // GO:0006355 // GO:0008150 // GO:0006351 // GO:0006355 // GO:0008150 // GO:0006351 // GO:0006355 // GO:0008150 // GO:0006351 // GO:0006355 // GO:0008150 // GO:0006351 // GO:0006355 // GO:0008150 // GO:0006351 // GO:0006355 // GO:0008150 // GO:0006351 // GO:0006355 // GO:0008150	transcription, DNA-dependent // regulation of transcription, DNA-dependent // biological_process // transcription, DNA-dependent // regulation of transcription, DNA-dependent // biological_process // transcription, DNA-dependent // regulation of transcription, DNA-dependent // biological_process // transcription, DNA-dependent // regulation of transcription, DNA-dependent // biological_process //…	inferred from electronic annotation // inferred from electronic annotation // no biological data available // inferred from electronic annotation // inferred from electronic annotation // no biological data available // inferred from electronic annotation // inferred from electronic annotation // no biological data available // inferred from electronic annotation // inferred from electronic annot…	GO:0005634 // GO:0005575 // GO:0005634 // GO:0005575 // GO:0005634 // GO:0005575 // GO:0005634 // GO:0005575 // GO:0005634 // GO:0005575 // GO:0005634 // GO:0005575 // GO:0005634 // GO:0005575	nucleus // cellular_component // nucleus // cellular_component // nucleus // cellular_component // nucleus // cellular_component // nucleus // cellular_component // nucleus // cellular_component // nucleus // cellular_component	inferred from electronic annotation // no biological data available // inferred from electronic annotation // no biological data available // inferred from electronic annotation // no biological data available // inferred from electronic annotation // no biological data available // inferred from electronic annotation // no biological data available // inferred from electronic annotation // no bi…	GO:0008270 // GO:0046872 // GO:0003674 // GO:0008270 // GO:0046872 // GO:0005515 // GO:0003674 // GO:0008270 // GO:0046872 // GO:0003674 // GO:0008270 // GO:0046872 // GO:0003674 // GO:0008270 // GO:0046872 // GO:0003674 // GO:0008270 // GO:0046872 // GO:0005515 // GO:0003674 // GO:0008270 // GO:0046872 // GO:0005515 // GO:0003674	zinc ion binding // metal ion binding // molecular_function // zinc ion binding // metal ion binding // protein binding // molecular_function // zinc ion binding // metal ion binding // molecular_function // zinc ion binding // metal ion binding // molecular_function // zinc ion binding // metal ion binding // molecular_function // zinc ion binding // metal ion binding // protein binding // molec…	inferred from electronic annotation // inferred from electronic annotation // no biological data available // inferred from electronic annotation // inferred from electronic annotation // inferred from electronic annotation // no biological data available // inferred from electronic annotation // inferred from electronic annotation // no biological data available // inferred from electronic annot…	---	---	---	---	---	main				NONMMUT021093	8.92958	8.86752	8.40172	4.3109	4.35219	4.21794
TC0800002842.mm.1	Psmb10	proteasome (prosome, macropain) subunit, beta type 10 // proteasome (prosome, macropain) subunit, beta type 10 // proteasome (prosome, macropain) subunit, beta type 10 // proteasome (prosome, macropain) subunit, beta type 10	Coding	< 1e-07	< 1e-07	1876.09	93.14	20.14	up	NM_013640 // ENSMUST00000034369 // uc009nep.2 // BC004730	RefSeq // ENSEMBL // UCSC Genes // GenBank	Mus musculus proteasome (prosome, macropain) subunit, beta type 10 (Psmb10), mRNA. // cdna:known chromosome:GRCm38:8:105935728:105938392:-1 gene:ENSMUSG00000031897 gene_biotype:protein_coding transcript_biotype:protein_coding // proteasome (prosome, macropain) subunit, beta type 10 // Mus musculus proteasome (prosome, macropain) subunit, beta type 10, mRNA (cDNA clone MGC:5837 IMAGE:3583052), com…	chr8	-	105935728	105938392	GO:0000902 // GO:0006508 // GO:0042098 // GO:0051603 // GO:0000902 // GO:0006508 // GO:0042098 // GO:0051603 // GO:0000902 // GO:0006508 // GO:0042098 // GO:0051603	cell morphogenesis // proteolysis // T cell proliferation // proteolysis involved in cellular protein catabolic process // cell morphogenesis // proteolysis // T cell proliferation // proteolysis involved in cellular protein catabolic process // cell morphogenesis // proteolysis // T cell proliferation // proteolysis involved in cellular protein catabolic process	inferred from mutant phenotype // inferred from electronic annotation // inferred from mutant phenotype // inferred from electronic annotation // inferred from mutant phenotype // inferred from electronic annotation // inferred from mutant phenotype // inferred from electronic annotation // inferred from mutant phenotype // inferred from electronic annotation // inferred from mutant phenotype // …	GO:0000502 // GO:0005634 // GO:0005737 // GO:0005839 // GO:0005829 // GO:0005839 // GO:0000502 // GO:0005634 // GO:0005737 // GO:0005839 // GO:0005829 // GO:0005839 // GO:0000502 // GO:0005634 // GO:0005737 // GO:0005839 // GO:0005829 // GO:0005839	proteasome complex // nucleus // cytoplasm // proteasome core complex // cytosol // proteasome core complex // proteasome complex // nucleus // cytoplasm // proteasome core complex // cytosol // proteasome core complex // proteasome complex // nucleus // cytoplasm // proteasome core complex // cytosol // proteasome core complex	inferred from electronic annotation // inferred from electronic annotation // inferred from electronic annotation // inferred from direct assay // traceable author statement // inferred from electronic annotation // inferred from electronic annotation // inferred from electronic annotation // inferred from electronic annotation // inferred from direct assay // traceable author statement // inferr…	GO:0004175 // GO:0004298 // GO:0008233 // GO:0016787 // GO:0004175 // GO:0004298 // GO:0008233 // GO:0016787 // GO:0004175 // GO:0004298 // GO:0008233 // GO:0016787	endopeptidase activity // threonine-type endopeptidase activity // peptidase activity // hydrolase activity // endopeptidase activity // threonine-type endopeptidase activity // peptidase activity // hydrolase activity // endopeptidase activity // threonine-type endopeptidase activity // peptidase activity // hydrolase activity	inferred from electronic annotation // inferred from electronic annotation // inferred from electronic annotation // inferred from electronic annotation // inferred from electronic annotation // inferred from electronic annotation // inferred from electronic annotation // inferred from electronic annotation // inferred from electronic annotation // inferred from electronic annotation // inferred …	GenMAPP // GenMAPP // GenMAPP	Proteasome_Degradation // Proteasome_Degradation // Proteasome_Degradation	Pfam // Pfam	IPR001353 // IPR024689	Proteasome, subunit alpha/beta // Proteasome beta subunit, C-terminal	main				NONMMUT066986	10.7931	10.8884	10.9712	6.57468	6.57057	6.52611
TC0600003109.mm.1	Gm5077	predicted gene 5077 // predicted gene 5077 // --- // predicted gene 5077	Coding	< 1e-07	< 1e-07	266.9	13.45	19.84	up	NM_173864 // ENSMUST00000068797 // OTTMUST00000071855 // BC160347 // uc009dre.1	RefSeq // ENSEMBL // Havana transcript // GenBank // UCSC Genes	Mus musculus predicted gene 5077 (Gm5077), mRNA. // cdna:known chromosome:GRCm38:6:124624625:124636085:-1 gene:ENSMUSG00000079343 gene_biotype:protein_coding transcript_biotype:protein_coding // novel protein, similar to complement component 1, s subcomponent C1s // Synthetic construct clone IMAGE:100064091, MGC:193462 predicted gene, EG317677 (EG317677) mRNA, encodes complete protein. // predict…	chr6	-	124624625	124636085	GO:0006508 // GO:0006956 // GO:0006958 // GO:0008152 // GO:0045087 // GO:0006508 // GO:0006956 // GO:0006958 // GO:0008152 // GO:0045087	proteolysis // complement activation // complement activation, classical pathway // metabolic process // innate immune response // proteolysis // complement activation // complement activation, classical pathway // metabolic process // innate immune response	inferred from electronic annotation // inferred from electronic annotation // inferred from electronic annotation // not recorded // inferred from electronic annotation // inferred from electronic annotation // inferred from electronic annotation // inferred from electronic annotation // not recorded // inferred from electronic annotation	GO:0005576 // GO:0005576	extracellular region // extracellular region	inferred from electronic annotation // inferred from electronic annotation	GO:0003824 // GO:0004252 // GO:0005509 // GO:0008233 // GO:0008236 // GO:0016787 // GO:0046872 // GO:0003824 // GO:0004252 // GO:0005509 // GO:0008233 // GO:0008236 // GO:0016787 // GO:0046872	catalytic activity // serine-type endopeptidase activity // calcium ion binding // peptidase activity // serine-type peptidase activity // hydrolase activity // metal ion binding // catalytic activity // serine-type endopeptidase activity // calcium ion binding // peptidase activity // serine-type peptidase activity // hydrolase activity // metal ion binding	inferred from electronic annotation // inferred from electronic annotation // inferred from electronic annotation // inferred from electronic annotation // inferred from electronic annotation // inferred from electronic annotation // inferred from electronic annotation // inferred from electronic annotation // inferred from electronic annotation // inferred from electronic annotation // inferred …	---	---	Pfam // Pfam // Pfam // Pfam	IPR000436 // IPR000859 // IPR001254 // IPR001881	Sushi/SCR/CCP // CUB domain // Peptidase S1 // EGF-like calcium-binding	main					8.37792	8.11484	7.7199	3.85643	3.70799	3.73272
TC0500003180.mm.1	Oas1g	2-5 oligoadenylate synthetase 1G // 2-5 oligoadenylate synthetase 1G // 2-5 oligoadenylate synthetase 1G // 2-5 oligoadenylate synthetase 1G // 2'-5' oligoadenylate synthetase 1G (Oas1g), mRNA. // 2'-5' oligoadenylate synthetase 1G // 2-5 oligoadenylate synthetase 1G // 2-5 oligoadenylate synthetase 1G // --- // --- // ---	Coding	< 1e-07	< 1e-07	793.99	41.28	19.24	up	NM_011852 // ENSMUST00000086368 // BC043339 // ENSMUST00000161809 // uc012ecu.1 // uc008zii.1 // ENSMUST00000162096 // BC018470 // OTTMUST00000075803 // OTTMUST00000075804 // OTTMUST00000075805	RefSeq // ENSEMBL // GenBank // ENSEMBL // UCSC Genes // UCSC Genes // ENSEMBL // GenBank // Havana transcript // Havana transcript // Havana transcript	Mus musculus 2-5 oligoadenylate synthetase 1G (Oas1g), mRNA. // cdna:known chromosome:GRCm38:5:120876142:120887582:-1 gene:ENSMUSG00000066861 gene_biotype:protein_coding transcript_biotype:protein_coding // Mus musculus 2-5 oligoadenylate synthetase 1G, mRNA (cDNA clone MGC:49551 IMAGE:5004267), complete cds. // cdna:known chromosome:GRCm38:5:120876944:120879603:-1 gene:ENSMUSG00000066861 gene_bi…	chr5	-	120876142	120887613	GO:0006164 // GO:0006955 // GO:0009615 // GO:0045087 // GO:0051607 // GO:0006955 // GO:0051607 // GO:0006164 // GO:0009615 // GO:0045087 // GO:0006955 // GO:0051607 // GO:0006164 // GO:0009615 // GO:0045087 // GO:0006164 // GO:0006955 // GO:0009615 // GO:0045087 // GO:0051607 // GO:0006955 // GO:0051607 // GO:0006164 // GO:0009615 // GO:0045087 // GO:0006955 // GO:0051607 // GO:0006164 // GO:0009…	purine nucleotide biosynthetic process // immune response // response to virus // innate immune response // defense response to virus // immune response // defense response to virus // purine nucleotide biosynthetic process // response to virus // innate immune response // immune response // defense response to virus // purine nucleotide biosynthetic process // response to virus // innate immune …	inferred from direct assay // inferred from electronic annotation // traceable author statement // inferred from electronic annotation // inferred from electronic annotation // inferred from electronic annotation // inferred from electronic annotation // inferred from direct assay // traceable author statement // inferred from electronic annotation // inferred from electronic annotation // inferr…	GO:0005634 // GO:0005737 // GO:0005634 // GO:0005737 // GO:0005739 // GO:0005783 // GO:0043231 // GO:0005634 // GO:0005737 // GO:0005634 // GO:0005737 // GO:0005739 // GO:0005783 // GO:0043231 // GO:0005634 // GO:0005737 // GO:0005634 // GO:0005737 // GO:0005739 // GO:0005783 // GO:0043231 // GO:0005634 // GO:0005737 // GO:0005634 // GO:0005737 // GO:0005739 // GO:0005783 // GO:0043231 // GO:0005…	nucleus // cytoplasm // nucleus // cytoplasm // mitochondrion // endoplasmic reticulum // intracellular membrane-bounded organelle // nucleus // cytoplasm // nucleus // cytoplasm // mitochondrion // endoplasmic reticulum // intracellular membrane-bounded organelle // nucleus // cytoplasm // nucleus // cytoplasm // mitochondrion // endoplasmic reticulum // intracellular membrane-bounded organelle …	not recorded // not recorded // inferred from electronic annotation // inferred from electronic annotation // inferred from electronic annotation // inferred from electronic annotation // inferred from electronic annotation // not recorded // not recorded // inferred from electronic annotation // inferred from electronic annotation // inferred from electronic annotation // inferred from electroni…	GO:0001730 // GO:0003725 // GO:0008270 // GO:0000166 // GO:0001730 // GO:0003723 // GO:0003725 // GO:0003725 // GO:0005524 // GO:0016740 // GO:0016779 // GO:0046872 // GO:0001730 // GO:0003725 // GO:0008270 // GO:0003723 // GO:0005524 // GO:0016740 // GO:0016779 // GO:0003725 // GO:0000166 // GO:0001730 // GO:0003725 // GO:0046872 // GO:0001730 // GO:0003725 // GO:0008270 // GO:0003723 // GO:0003…	2'-5'-oligoadenylate synthetase activity // double-stranded RNA binding // zinc ion binding // nucleotide binding // 2'-5'-oligoadenylate synthetase activity // RNA binding // double-stranded RNA binding // double-stranded RNA binding // ATP binding // transferase activity // nucleotidyltransferase activity // metal ion binding // 2'-5'-oligoadenylate synthetase activity // double-stranded RNA bi…	not recorded // not recorded // not recorded // inferred from electronic annotation // inferred from direct assay // inferred from electronic annotation // inferred from direct assay // inferred from electronic annotation // inferred from electronic annotation // inferred from electronic annotation // inferred from electronic annotation // inferred from electronic annotation // not recorded // no…	GenMAPP // GenMAPP // GenMAPP // GenMAPP // GenMAPP // GenMAPP	mRNA_processing_binding_Reactome // mRNA_processing_binding_Reactome // mRNA_processing_binding_Reactome // mRNA_processing_binding_Reactome // mRNA_processing_binding_Reactome // mRNA_processing_binding_Reactome	Pfam // Pfam // Pfam // Pfam	IPR002934 // IPR018952 // IPR002934 // IPR018952	Nucleotidyl transferase domain // 2'-5'-oligoadenylate synthetase 1, domain 2/C-terminal // Nucleotidyl transferase domain // 2'-5'-oligoadenylate synthetase 1, domain 2/C-terminal	main					9.7385	9.73676	9.45588	5.45143	5.34125	5.3568
TC0900000044.mm.1	Mmp13	matrix metallopeptidase 13 // matrix metallopeptidase 13 // matrix metallopeptidase 13 // matrix metallopeptidase 13	Coding	< 1e-07	< 1e-07	225.23	12.37	18.21	up	NM_008607 // ENSMUST00000015394 // uc009ocg.2 // BC125320	RefSeq // ENSEMBL // UCSC Genes // GenBank	Mus musculus matrix metallopeptidase 13 (Mmp13), mRNA. // cdna:known chromosome:GRCm38:9:7272514:7283333:1 gene:ENSMUSG00000050578 gene_biotype:protein_coding transcript_biotype:protein_coding // matrix metallopeptidase 13 // Mus musculus matrix metallopeptidase 13, mRNA (cDNA clone MGC:159023 IMAGE:40129835), complete cds.	chr9	+	7272514	7283333	GO:0006508 // GO:0030282 // GO:0030574 // GO:0031623 // GO:0043171 // GO:0044267 // GO:0051216 // GO:0006508 // GO:0030574 // GO:0006508 // GO:0030282 // GO:0030574 // GO:0031623 // GO:0043171 // GO:0044267 // GO:0051216 // GO:0008152 // GO:0001666 // GO:0006508 // GO:0009612 // GO:0031623 // GO:0035116 // GO:0043171 // GO:0043627 // GO:0030574 // GO:0006508 // GO:0030282 // GO:0030574 // GO:0031…	proteolysis // bone mineralization // collagen catabolic process // receptor internalization // peptide catabolic process // cellular protein metabolic process // cartilage development // proteolysis // collagen catabolic process // proteolysis // bone mineralization // collagen catabolic process // receptor internalization // peptide catabolic process // cellular protein metabolic process // car…	not recorded // inferred from mutant phenotype // inferred from direct assay // not recorded // not recorded // inferred from direct assay // inferred from mutant phenotype // inferred from electronic annotation // inferred from electronic annotation // not recorded // inferred from mutant phenotype // inferred from direct assay // not recorded // not recorded // inferred from direct assay // inf…	GO:0005576 // GO:0005578 // GO:0005583 // GO:0005615 // GO:0005764 // GO:0005794 // GO:0031012 // GO:0046581 // GO:0005576 // GO:0005578 // GO:0005583 // GO:0005615 // GO:0005764 // GO:0005794 // GO:0031012 // GO:0046581 // GO:0005764 // GO:0005583 // GO:0005615 // GO:0005794 // GO:0046581 // GO:0005576 // GO:0005578 // GO:0005583 // GO:0005615 // GO:0005764 // GO:0005794 // GO:0031012 // GO:0046…	extracellular region // proteinaceous extracellular matrix // fibrillar collagen // extracellular space // lysosome // Golgi apparatus // extracellular matrix // intercellular canaliculus // extracellular region // proteinaceous extracellular matrix // fibrillar collagen // extracellular space // lysosome // Golgi apparatus // extracellular matrix // intercellular canaliculus // lysosome // fibri…	inferred from electronic annotation // inferred from electronic annotation // not recorded // not recorded // not recorded // not recorded // inferred from electronic annotation // not recorded // inferred from electronic annotation // inferred from electronic annotation // not recorded // not recorded // not recorded // not recorded // inferred from electronic annotation // not recorded // infer…	GO:0001968 // GO:0004222 // GO:0004222 // GO:0005509 // GO:0008233 // GO:0008237 // GO:0008270 // GO:0016787 // GO:0046872 // GO:0048306 // GO:0050750 // GO:0004222 // GO:0005509 // GO:0008233 // GO:0008270 // GO:0001968 // GO:0004222 // GO:0004222 // GO:0005509 // GO:0008233 // GO:0008237 // GO:0008270 // GO:0016787 // GO:0046872 // GO:0048306 // GO:0050750 // GO:0005509 // GO:0001968 // GO:0008…	fibronectin binding // metalloendopeptidase activity // metalloendopeptidase activity // calcium ion binding // peptidase activity // metallopeptidase activity // zinc ion binding // hydrolase activity // metal ion binding // calcium-dependent protein binding // low-density lipoprotein particle receptor binding // metalloendopeptidase activity // calcium ion binding // peptidase activity // zinc …	not recorded // inferred from direct assay // not recorded // not recorded // inferred from direct assay // inferred from electronic annotation // not recorded // inferred from electronic annotation // inferred from electronic annotation // not recorded // not recorded // inferred from electronic annotation // inferred from electronic annotation // inferred from electronic annotation // inferred …	GenMAPP // GenMAPP // GenMAPP	Matrix_Metalloproteinases // Matrix_Metalloproteinases // Matrix_Metalloproteinases	Pfam // Pfam // Pfam	IPR001818 // IPR002477 // IPR018487	Peptidase M10, metallopeptidase // Peptidoglycan binding-like // Hemopexin-like repeats	main					7.51594	7.85311	8.10888	3.6651	3.64761	3.62137
TC0600001422.mm.1	C1ra	complement component 1, r subcomponent A // complement component 1, r subcomponent B // complement component 1, r subcomponent A // complement component 1, r subcomponent A (C1ra), mRNA. // complement component 1, r subcomponent A // complement component 1, r subcomponent A // complement component 1, r subcomponent A // complement component 1, r subcomponent A	Coding	< 1e-07	< 1e-07	421.29	25.42	16.57	up	NM_023143 // ENSMUST00000068593 // uc009dqz.2 // uc009dra.2 // BC093528 // BC004637 // BC172078	RefSeq // ENSEMBL // UCSC Genes // UCSC Genes // GenBank // GenBank // GenBank	Mus musculus complement component 1, r subcomponent A (C1ra), mRNA. // cdna:known chromosome:GRCm38:6:124512632:124523440:1 gene:ENSMUSG00000055172 gene_biotype:protein_coding transcript_biotype:protein_coding // complement component 1, r subcomponent A (C1ra), mRNA. // complement component 1, r subcomponent A // Mus musculus complement component 1, r subcomponent, mRNA (cDNA clone MGC:103110 IMA…	chr6	+	124512405	124523440	GO:0006508 // GO:0006956 // GO:0006958 // GO:0045087 // GO:0006508 // GO:0006956 // GO:0006958 // GO:0045087 // GO:0006508 // GO:0006956 // GO:0006958 // GO:0045087 // GO:0006508 // GO:0006956 // GO:0006958 // GO:0045087 // GO:0006508 // GO:0006956 // GO:0006958 // GO:0045087	proteolysis // complement activation // complement activation, classical pathway // innate immune response // proteolysis // complement activation // complement activation, classical pathway // innate immune response // proteolysis // complement activation // complement activation, classical pathway // innate immune response // proteolysis // complement activation // complement activation, classi…	inferred from electronic annotation // inferred from electronic annotation // inferred from electronic annotation // inferred from electronic annotation // inferred from electronic annotation // inferred from electronic annotation // inferred from electronic annotation // inferred from electronic annotation // inferred from electronic annotation // inferred from electronic annotation // inferred …	GO:0005576 // GO:0005576 // GO:0005575 // GO:0005576 // GO:0005576 // GO:0005576	extracellular region // extracellular region // cellular_component // extracellular region // extracellular region // extracellular region	inferred from electronic annotation // inferred from electronic annotation // no biological data available // inferred from electronic annotation // inferred from electronic annotation // inferred from electronic annotation	GO:0003824 // GO:0004252 // GO:0005509 // GO:0008233 // GO:0008236 // GO:0016787 // GO:0004252 // GO:0003824 // GO:0004252 // GO:0005509 // GO:0008233 // GO:0008236 // GO:0016787 // GO:0005515 // GO:0004252 // GO:0003824 // GO:0004252 // GO:0005509 // GO:0008233 // GO:0008236 // GO:0016787 // GO:0004252 // GO:0003824 // GO:0004252 // GO:0005509 // GO:0008233 // GO:0008236 // GO:0016787 // GO:0004…	catalytic activity // serine-type endopeptidase activity // calcium ion binding // peptidase activity // serine-type peptidase activity // hydrolase activity // serine-type endopeptidase activity // catalytic activity // serine-type endopeptidase activity // calcium ion binding // peptidase activity // serine-type peptidase activity // hydrolase activity // protein binding // serine-type endopept…	inferred from electronic annotation // not recorded // inferred from electronic annotation // inferred from electronic annotation // inferred from electronic annotation // inferred from electronic annotation // inferred from electronic annotation // inferred from electronic annotation // not recorded // inferred from electronic annotation // inferred from electronic annotation // inferred from el…	GenMAPP // GenMAPP // GenMAPP // GenMAPP // GenMAPP	Complement_Activation_Classical // Complement_Activation_Classical // Complement_Activation_Classical // Complement_Activation_Classical // Complement_Activation_Classical	Pfam // Pfam // Pfam // Pfam	IPR000436 // IPR000859 // IPR001254 // IPR001881	Sushi/SCR/CCP // CUB domain // Peptidase S1 // EGF-like calcium-binding	main			NONMMUT058777 7471bp;		8.89199	8.82608	8.47009	4.68787	4.64002	4.72293
TC1900000246.mm.1	Mpeg1	macrophage expressed gene 1 // macrophage expressed gene 1 // macrophage expressed gene 1 // macrophage expressed gene 1	Coding	< 1e-07	< 1e-07	149.18	9.11	16.38	up	NM_010821 // ENSMUST00000081035 // uc008gub.1 // BC129843	RefSeq // ENSEMBL // UCSC Genes // GenBank	Mus musculus macrophage expressed gene 1 (Mpeg1), mRNA. // cdna:known chromosome:GRCm38:19:12460779:12465284:1 gene:ENSMUSG00000046805 gene_biotype:protein_coding transcript_biotype:protein_coding // macrophage expressed gene 1 // Mus musculus macrophage expressed gene 1, mRNA (cDNA clone MGC:150002 IMAGE:40095576), complete cds.	chr19	+	12460779	12465285	---	---	---	GO:0016020 // GO:0016021 // GO:0016020 // GO:0016021 // GO:0016020 // GO:0016021	membrane // integral to membrane // membrane // integral to membrane // membrane // integral to membrane	inferred from electronic annotation // inferred from electronic annotation // inferred from electronic annotation // inferred from electronic annotation // inferred from electronic annotation // inferred from electronic annotation	---	---	---	GenMAPP // GenMAPP // GenMAPP	Cell_Cycle_KEGG // Cell_Cycle_KEGG // Cell_Cycle_KEGG	Pfam	IPR020864	Membrane attack complex component/perforin (MACPF) domain	main	NONMMUT033955 6204bp;				7.38399	7.3285	6.98231	3.14244	3.34653	3.12058
TC1100000614.mm.1	Irf1	interferon regulatory factor 1 // interferon regulatory factor 1 // interferon regulatory factor 1 // interferon regulatory factor 1 // interferon regulatory factor 1 // interferon regulatory factor 1 // interferon regulatory factor 1 // interferon regulatory factor 1 // interferon regulatory factor 1 // interferon regulatory factor 1 // interferon regulatory factor 1 // interferon regulatory fac…	Coding	< 1e-07	< 1e-07	1762.03	108.05	16.31	up	NM_008390 // NM_001159393 // NM_001159396 // ENSMUST00000108920 // ENSMUST00000140866 // ENSMUST00000108922 // ENSMUST00000128336 // ENSMUST00000142221 // ENSMUST00000138913 // ENSMUST00000123376 // ENSMUST00000019043 // ENSMUST00000133291 // ENSMUST00000153054 // uc007iww.2 // uc007iwx.2 // uc007iwy.2 // uc007iwz.2 // BC003821 // OTTMUST00000012563 // OTTMUST00000071566 // OTTMUST00000044065 // …	RefSeq // RefSeq // RefSeq // ENSEMBL // ENSEMBL // ENSEMBL // ENSEMBL // ENSEMBL // ENSEMBL // ENSEMBL // ENSEMBL // ENSEMBL // ENSEMBL // UCSC Genes // UCSC Genes // UCSC Genes // UCSC Genes // GenBank // Havana transcript // Havana transcript // Havana transcript // Havana transcript // Havana transcript // Havana transcript // Havana transcript // Havana transcript // Havana transcript // Hav…	Mus musculus interferon regulatory factor 1 (Irf1), transcript variant 1, mRNA. // Mus musculus interferon regulatory factor 1 (Irf1), transcript variant 3, mRNA. // Mus musculus interferon regulatory factor 1 (Irf1), transcript variant 2, mRNA. // cdna:known chromosome:GRCm38:11:53770014:53777323:1 gene:ENSMUSG00000018899 gene_biotype:protein_coding transcript_biotype:protein_coding // cdna:nove…	chr11	+	53770014	53778374	GO:0002819 // GO:0006351 // GO:0006355 // GO:0006917 // GO:0007050 // GO:0007249 // GO:0010468 // GO:0010942 // GO:0032481 // GO:0032728 // GO:0032825 // GO:0034124 // GO:0035458 // GO:0042512 // GO:0043374 // GO:0045084 // GO:0045084 // GO:0045087 // GO:0045088 // GO:0045590 // GO:0045627 // GO:0045629 // GO:0045892 // GO:0045892 // GO:0045893 // GO:0045893 // GO:0045893 // GO:0045944 // GO:0045…	regulation of adaptive immune response // transcription, DNA-dependent // regulation of transcription, DNA-dependent // induction of apoptosis // cell cycle arrest // I-kappaB kinase/NF-kappaB cascade // regulation of gene expression // positive regulation of cell death // positive regulation of type I interferon production // positive regulation of interferon-beta production // positive regulati…	traceable author statement // inferred from electronic annotation // inferred from electronic annotation // not recorded // not recorded // not recorded // inferred from mutant phenotype // not recorded // inferred from mutant phenotype // not recorded // traceable author statement // inferred from mutant phenotype // not recorded // not recorded // inferred from mutant phenotype // inferred from…	GO:0000790 // GO:0005634 // GO:0005634 // GO:0005634 // GO:0005737 // GO:0000790 // GO:0005634 // GO:0005737 // GO:0000790 // GO:0005634 // GO:0005634 // GO:0005634 // GO:0005737 // GO:0000790 // GO:0005634 // GO:0005737 // GO:0000790 // GO:0005634 // GO:0005634 // GO:0005634 // GO:0005737 // GO:0000790 // GO:0005634 // GO:0005737 // GO:0000790 // GO:0005634 // GO:0005634 // GO:0005634 // GO:0005…	nuclear chromatin // nucleus // nucleus // nucleus // cytoplasm // nuclear chromatin // nucleus // cytoplasm // nuclear chromatin // nucleus // nucleus // nucleus // cytoplasm // nuclear chromatin // nucleus // cytoplasm // nuclear chromatin // nucleus // nucleus // nucleus // cytoplasm // nuclear chromatin // nucleus // cytoplasm // nuclear chromatin // nucleus // nucleus // nucleus // cytoplasm…	not recorded // inferred by curator // inferred from direct assay // not recorded // inferred from direct assay // inferred from electronic annotation // inferred from electronic annotation // inferred from electronic annotation // not recorded // inferred by curator // inferred from direct assay // not recorded // inferred from direct assay // inferred from electronic annotation // inferred from…	GO:0000975 // GO:0000978 // GO:0003677 // GO:0003700 // GO:0003700 // GO:0005515 // GO:0043565 // GO:0043565 // GO:0000978 // GO:0003677 // GO:0003700 // GO:0000975 // GO:0000978 // GO:0003677 // GO:0003700 // GO:0003700 // GO:0005515 // GO:0043565 // GO:0043565 // GO:0000978 // GO:0003677 // GO:0003700 // GO:0000975 // GO:0000978 // GO:0003677 // GO:0003700 // GO:0003700 // GO:0005515 // GO:0043…	regulatory region DNA binding // RNA polymerase II core promoter proximal region sequence-specific DNA binding // DNA binding // sequence-specific DNA binding transcription factor activity // sequence-specific DNA binding transcription factor activity // protein binding // sequence-specific DNA binding // sequence-specific DNA binding // RNA polymerase II core promoter proximal region sequence-sp…	inferred from electronic annotation // not recorded // inferred from direct assay // inferred from direct assay // not recorded // inferred from physical interaction // inferred from direct assay // not recorded // inferred from electronic annotation // inferred from electronic annotation // inferred from electronic annotation // inferred from electronic annotation // not recorded // inferred fro…	GenMAPP // GenMAPP // GenMAPP // GenMAPP // GenMAPP // GenMAPP // GenMAPP // GenMAPP // GenMAPP // GenMAPP // GenMAPP // GenMAPP // GenMAPP // GenMAPP	Apoptosis // Apoptosis // Apoptosis // Apoptosis // Apoptosis // Apoptosis // Apoptosis // Apoptosis // Apoptosis // Apoptosis // Apoptosis // Apoptosis // Apoptosis // Apoptosis	Pfam // Pfam // Pfam // Pfam // Pfam // Pfam // Pfam // Pfam	IPR001346 // IPR001346 // IPR001346 // IPR001346 // IPR001346 // IPR001346 // IPR001346 // IPR001346	Interferon regulatory factor DNA-binding domain // Interferon regulatory factor DNA-binding domain // Interferon regulatory factor DNA-binding domain // Interferon regulatory factor DNA-binding domain // Interferon regulatory factor DNA-binding domain // Interferon regulatory factor DNA-binding domain // Interferon regulatory factor DNA-binding domain // Interferon regulatory factor DNA-binding d…	main					10.8139	10.8397	10.7277	6.91066	6.70565	6.69781
TC1500000632.mm.1	Apol9b	apolipoprotein L 9b // apolipoprotein L 9b // apolipoprotein L 9b // apolipoprotein L 9b (Apol9b), transcript variant 2, mRNA. // apolipoprotein L 9b	Coding	< 1e-07	< 1e-07	359.41	24.31	14.78	up	NM_173743 // NM_001168660 // ENSMUST00000109775 // uc007wny.2 // uc007wnz.2	RefSeq // RefSeq // ENSEMBL // UCSC Genes // UCSC Genes	Mus musculus apolipoprotein L 9b (Apol9b), transcript variant 2, mRNA. // Mus musculus apolipoprotein L 9b (Apol9b), transcript variant 1, mRNA. // cdna:known chromosome:GRCm38:15:77729121:77736381:1 gene:ENSMUSG00000068246 gene_biotype:protein_coding transcript_biotype:protein_coding // apolipoprotein L 9b (Apol9b), transcript variant 2, mRNA. // apolipoprotein L 9b	chr15	+	77729072	77736382	GO:0006869 // GO:0008150 // GO:0042157 // GO:0006869 // GO:0008150 // GO:0042157 // GO:0006869 // GO:0042157 // GO:0008150	lipid transport // biological_process // lipoprotein metabolic process // lipid transport // biological_process // lipoprotein metabolic process // lipid transport // lipoprotein metabolic process // biological_process	inferred from electronic annotation // no biological data available // inferred from electronic annotation // inferred from electronic annotation // no biological data available // inferred from electronic annotation // inferred from electronic annotation // inferred from electronic annotation // no biological data available	GO:0005575 // GO:0005576 // GO:0005575 // GO:0005576 // GO:0005576 // GO:0005575	cellular_component // extracellular region // cellular_component // extracellular region // extracellular region // cellular_component	no biological data available // inferred from electronic annotation // no biological data available // inferred from electronic annotation // inferred from electronic annotation // no biological data available	GO:0003674 // GO:0008289 // GO:0003674 // GO:0008289 // GO:0008289 // GO:0003674	molecular_function // lipid binding // molecular_function // lipid binding // lipid binding // molecular_function	no biological data available // inferred from electronic annotation // no biological data available // inferred from electronic annotation // inferred from electronic annotation // no biological data available	---	---	Pfam	IPR008405	Apolipoprotein L	main			KnowTID_00002800 4379bp;		8.65839	8.50302	8.3393	4.42006	4.80566	4.6329
TC1700000621.mm.1	Tap1	transporter 1, ATP-binding cassette, sub-family B (MDR/TAP) // transporter 1, ATP-binding cassette, sub-family B (MDR/TAP) // transporter 1, ATP-binding cassette, sub-family B (MDR/TAP) // transporter 1, ATP-binding cassette, sub-family B (MDR/TAP) // transporter 1, ATP-binding cassette, sub-family B (MDR/TAP) // transporter 1, ATP-binding cassette, sub-family B (MDR/TAP) // transporter 1, ATP-bi…	Coding	< 1e-07	< 1e-07	1006.71	70.07	14.37	up	NM_001161730 // NM_013683 // ENSMUST00000170086 // ENSMUST00000166287 // ENSMUST00000166853 // ENSMUST00000041633 // ENSMUST00000168351 // ENSMUST00000171148 // ENSMUST00000166582 // uc008cbt.2 // uc012apt.1 // uc012apu.1 // uc008cbu.2 // uc008cbv.2 // BC024897 // BC013802 // OTTMUST00000093466 // OTTMUST00000093467 // OTTMUST00000093468 // OTTMUST00000093469 // OTTMUST00000093470 // OTTMUST00000…	RefSeq // RefSeq // ENSEMBL // ENSEMBL // ENSEMBL // ENSEMBL // ENSEMBL // ENSEMBL // ENSEMBL // UCSC Genes // UCSC Genes // UCSC Genes // UCSC Genes // UCSC Genes // GenBank // GenBank // Havana transcript // Havana transcript // Havana transcript // Havana transcript // Havana transcript // Havana transcript // Havana transcript	Mus musculus transporter 1, ATP-binding cassette, sub-family B (MDR/TAP) (Tap1), transcript variant 2, mRNA. // Mus musculus transporter 1, ATP-binding cassette, sub-family B (MDR/TAP) (Tap1), transcript variant 1, mRNA. // cdna:known chromosome:GRCm38:17:34187553:34197225:1 gene:ENSMUSG00000037321 gene_biotype:protein_coding transcript_biotype:protein_coding // cdna:known chromosome:GRCm38:17:34…	chr17	+	34187553	34197225	GO:0001916 // GO:0006200 // GO:0006200 // GO:0006810 // GO:0006952 // GO:0008152 // GO:0015031 // GO:0015833 // GO:0019060 // GO:0019885 // GO:0042270 // GO:0046967 // GO:0055085 // GO:0055085 // GO:0001916 // GO:0015833 // GO:0015833 // GO:0019060 // GO:0019885 // GO:0046967 // GO:0055085 // GO:0001916 // GO:0006200 // GO:0006200 // GO:0006810 // GO:0006952 // GO:0008152 // GO:0015031 // GO:0015…	positive regulation of T cell mediated cytotoxicity // ATP catabolic process // ATP catabolic process // transport // defense response // metabolic process // protein transport // peptide transport // intracellular transport of viral proteins in host cell // antigen processing and presentation of endogenous peptide antigen via MHC class I // protection from natural killer cell mediated cytotoxici…	not recorded // inferred from electronic annotation // not recorded // inferred from electronic annotation // inferred from mutant phenotype // inferred from electronic annotation // inferred from electronic annotation // not recorded // not recorded // not recorded // not recorded // not recorded // not recorded // inferred from electronic annotation // --- // --- // inferred from electronic ann…	GO:0005739 // GO:0005783 // GO:0005886 // GO:0016020 // GO:0016021 // GO:0030176 // GO:0042825 // GO:0043231 // GO:0005789 // GO:0005886 // GO:0016021 // GO:0030176 // GO:0030670 // GO:0042825 // GO:0005739 // GO:0005783 // GO:0005886 // GO:0016020 // GO:0016021 // GO:0030176 // GO:0042825 // GO:0043231 // GO:0005789 // GO:0005886 // GO:0016021 // GO:0030176 // GO:0030670 // GO:0042825 // GO:0005…	mitochondrion // endoplasmic reticulum // plasma membrane // membrane // integral to membrane // integral to endoplasmic reticulum membrane // TAP complex // intracellular membrane-bounded organelle // endoplasmic reticulum membrane // plasma membrane // integral to membrane // integral to endoplasmic reticulum membrane // phagocytic vesicle membrane // TAP complex // mitochondrion // endoplasmic…	inferred from direct assay // inferred from electronic annotation // not recorded // inferred from electronic annotation // not recorded // not recorded // not recorded // not recorded // inferred from electronic annotation // --- // inferred from electronic annotation // inferred from electronic annotation // traceable author statement // --- // inferred from direct assay // inferred from electr…	GO:0000166 // GO:0005215 // GO:0005524 // GO:0015197 // GO:0015421 // GO:0016887 // GO:0017111 // GO:0042288 // GO:0042288 // GO:0042605 // GO:0042626 // GO:0042803 // GO:0043531 // GO:0046978 // GO:0046979 // GO:0046980 // GO:0046982 // GO:0000166 // GO:0005524 // GO:0015197 // GO:0015421 // GO:0016887 // GO:0042605 // GO:0043531 // GO:0046978 // GO:0046979 // GO:0046980 // GO:0000166 // GO:0005…	nucleotide binding // transporter activity // ATP binding // peptide transporter activity // oligopeptide-transporting ATPase activity // ATPase activity // nucleoside-triphosphatase activity // MHC class I protein binding // MHC class I protein binding // peptide antigen binding // ATPase activity, coupled to transmembrane movement of substances // protein homodimerization activity // ADP bindin…	not recorded // inferred from electronic annotation // not recorded // not recorded // not recorded // not recorded // inferred from electronic annotation // inferred from physical interaction // not recorded // not recorded // inferred from electronic annotation // not recorded // not recorded // not recorded // not recorded // not recorded // not recorded // inferred from electronic annotation …	---	---	Pfam // Pfam // Pfam // Pfam // Pfam	IPR001140 // IPR003439 // IPR001140 // IPR003439 // IPR001140	ABC transporter, transmembrane domain // ABC transporter-like // ABC transporter, transmembrane domain // ABC transporter-like // ABC transporter, transmembrane domain	main			NONMMUT029292 6302bp;	NONMMUT029289	9.97666	10.0448	9.93705	6.01356	6.07454	6.35187
TC0700004515.mm.1	Ifitm3	interferon induced transmembrane protein 3 // interferon induced transmembrane protein 3 // interferon induced transmembrane protein 3 // interferon induced transmembrane protein 3 // ---	Coding	< 1e-07	< 1e-07	391.93	29.66	13.21	up	NM_025378 // ENSMUST00000026565 // uc009kjc.1 // BC010291 // OTTMUST00000097290	RefSeq // ENSEMBL // UCSC Genes // GenBank // Havana transcript	Mus musculus interferon induced transmembrane protein 3 (Ifitm3), mRNA. // cdna:known chromosome:GRCm38:7:141009586:141010770:-1 gene:ENSMUSG00000025492 gene_biotype:protein_coding transcript_biotype:protein_coding // interferon induced transmembrane protein 3 // Mus musculus interferon induced transmembrane protein 3, mRNA (cDNA clone MGC:11751 IMAGE:3152819), complete cds. // interferon induced…	chr7	-	141009586	141010770	GO:0008285 // GO:0009607 // GO:0009615 // GO:0009615 // GO:0034341 // GO:0035455 // GO:0035456 // GO:0045071 // GO:0045087 // GO:0046597 // GO:0046597 // GO:0051607 // GO:0051607 // GO:0060337 // GO:0051607 // GO:0008285 // GO:0009607 // GO:0009615 // GO:0009615 // GO:0034341 // GO:0035455 // GO:0035456 // GO:0045071 // GO:0045087 // GO:0046597 // GO:0046597 // GO:0051607 // GO:0051607 // GO:0060…	negative regulation of cell proliferation // response to biotic stimulus // response to virus // response to virus // response to interferon-gamma // response to interferon-alpha // response to interferon-beta // negative regulation of viral genome replication // innate immune response // negative regulation of viral entry into host cell // negative regulation of viral entry into host cell // def…	inferred from direct assay // inferred from electronic annotation // inferred from direct assay // not recorded // not recorded // not recorded // not recorded // not recorded // inferred from electronic annotation // inferred from direct assay // not recorded // inferred from direct assay // inferred from mutant phenotype // inferred from direct assay // inferred from electronic annotation // in…	GO:0005764 // GO:0005768 // GO:0005783 // GO:0005886 // GO:0016020 // GO:0016021 // GO:0016023 // GO:0005765 // GO:0031902 // GO:0005764 // GO:0005768 // GO:0005783 // GO:0005886 // GO:0016020 // GO:0016021 // GO:0016023 // GO:0005765 // GO:0031902 // GO:0005764 // GO:0005768 // GO:0005783 // GO:0005886 // GO:0016020 // GO:0016021 // GO:0016023 // GO:0005765 // GO:0031902	lysosome // endosome // endoplasmic reticulum // plasma membrane // membrane // integral to membrane // cytoplasmic membrane-bounded vesicle // lysosomal membrane // late endosome membrane // lysosome // endosome // endoplasmic reticulum // plasma membrane // membrane // integral to membrane // cytoplasmic membrane-bounded vesicle // lysosomal membrane // late endosome membrane // lysosome // end…	inferred from electronic annotation // inferred from electronic annotation // inferred from direct assay // inferred from electronic annotation // inferred from electronic annotation // inferred from electronic annotation // inferred from direct assay // inferred from electronic annotation // inferred from electronic annotation // inferred from electronic annotation // inferred from electronic an…	---	---	---	---	---	Pfam	IPR007593	Interferon-induced transmembrane protein	main			NONMMUT064174 5022bp;		8.74509	8.53516	8.59534	4.74267	5.2321	4.74425
TC0100003593.mm.1	AI607873	expressed sequence AI607873 // expressed sequence AI607873 // expressed sequence AI607873 // expressed sequence AI607873 // ---	Coding	< 1e-07	< 1e-07	147.55	12.2	12.09	up	NM_001204910 // ENSMUST00000042610 // ENSMUST00000127730 // uc007dru.3 // uc011www.2 // BC150711 // OTTMUST00000085567	RefSeq // ENSEMBL // ENSEMBL // UCSC Genes // UCSC Genes // GenBank // Havana transcript	Mus musculus expressed sequence AI607873 (AI607873), mRNA. // cdna:known chromosome:GRCm38:1:173723430:173741809:-1 gene:ENSMUSG00000073490 gene_biotype:protein_coding transcript_biotype:protein_coding // cdna:novel chromosome:GRCm38:1:173723683:173741747:-1 gene:ENSMUSG00000073490 gene_biotype:protein_coding transcript_biotype:protein_coding // expressed sequence AI607873 // expressed sequence A…	chr1	-	173723427	173741809	GO:0008150 // GO:0008150 // GO:0008150 // GO:0008150	biological_process // biological_process // biological_process // biological_process	no biological data available // no biological data available // no biological data available // no biological data available	GO:0005575 // GO:0005575 // GO:0005575 // GO:0005575	cellular_component // cellular_component // cellular_component // cellular_component	no biological data available // no biological data available // no biological data available // no biological data available	GO:0003674 // GO:0003674 // GO:0003674 // GO:0003674	molecular_function // molecular_function // molecular_function // molecular_function	no biological data available // no biological data available // no biological data available // no biological data available	---	---	Pfam // Pfam // Pfam // Pfam	IPR004020 // IPR004021 // IPR004020 // IPR004021	DAPIN domain // HIN-200/IF120x // DAPIN domain // HIN-200/IF120x	main				NONMMUT003876	7.46511	7.41895	6.76338	3.54777	3.68179	3.64512
TC1900000501.mm.1	Ifit3	interferon-induced protein with tetratricopeptide repeats 3 // interferon-induced protein with tetratricopeptide repeats 3 // interferon-induced protein with tetratricopeptide repeats 3 // interferon-induced protein with tetratricopeptide repeats 3 // interferon-induced protein with tetratricopeptide repeats 3 // ---	Coding	1e-07	1.16e-05	493.1	41.42	11.9	up	NM_010501 // ENSMUST00000102825 // uc008hgo.1 // BC089563 // BC003804 // OTTMUST00000040263	RefSeq // ENSEMBL // UCSC Genes // GenBank // GenBank // Havana transcript	Mus musculus interferon-induced protein with tetratricopeptide repeats 3 (Ifit3), mRNA. // cdna:known chromosome:GRCm38:19:34583531:34588731:1 gene:ENSMUSG00000074896 gene_biotype:protein_coding transcript_biotype:protein_coding // interferon-induced protein with tetratricopeptide repeats 3 // Mus musculus interferon-induced protein with tetratricopeptide repeats 3, mRNA (cDNA clone MGC:107331 IM…	chr19	+	34583529	34588982	GO:0035457 // GO:0035458 // GO:0045087 // GO:0051607 // GO:0008285 // GO:0009615 // GO:0035634 // GO:0043066 // GO:0035457 // GO:0035458 // GO:0045087 // GO:0051607 // GO:0009615 // GO:0043066 // GO:0008285 // GO:0035634 // GO:0035457 // GO:0035458 // GO:0045087 // GO:0051607 // GO:0008285 // GO:0009615 // GO:0035634 // GO:0043066 // GO:0035457 // GO:0035458 // GO:0045087 // GO:0051607 // GO:0008…	cellular response to interferon-alpha // cellular response to interferon-beta // innate immune response // defense response to virus // negative regulation of cell proliferation // response to virus // response to stilbenoid // negative regulation of apoptotic process // cellular response to interferon-alpha // cellular response to interferon-beta // innate immune response // defense response to …	inferred from electronic annotation // inferred from direct assay // inferred from electronic annotation // inferred from electronic annotation // inferred from sequence or structural similarity // inferred from sequence or structural similarity // inferred from expression pattern // inferred from sequence or structural similarity // inferred from electronic annotation // inferred from direct ass…	GO:0005737 // GO:0005739 // GO:0005737 // GO:0005737 // GO:0005739 // GO:0005739 // GO:0005737 // GO:0005739 // GO:0005739 // GO:0005737 // GO:0005737 // GO:0005739 // GO:0005737 // GO:0005739 // GO:0005737 // GO:0005737 // GO:0005739 // GO:0005739 // GO:0005737 // GO:0005739 // GO:0005737 // GO:0005737 // GO:0005739 // GO:0005739	cytoplasm // mitochondrion // cytoplasm // cytoplasm // mitochondrion // mitochondrion // cytoplasm // mitochondrion // mitochondrion // cytoplasm // cytoplasm // mitochondrion // cytoplasm // mitochondrion // cytoplasm // cytoplasm // mitochondrion // mitochondrion // cytoplasm // mitochondrion // cytoplasm // cytoplasm // mitochondrion // mitochondrion	not recorded // not recorded // inferred from electronic annotation // inferred from sequence or structural similarity // inferred from electronic annotation // inferred from sequence or structural similarity // not recorded // not recorded // inferred from sequence or structural similarity // inferred from sequence or structural similarity // inferred from electronic annotation // inferred from …	GO:0005515 // GO:0042802 // GO:0005515 // GO:0042802 // GO:0005515 // GO:0042802 // GO:0005515 // GO:0042802	protein binding // identical protein binding // protein binding // identical protein binding // protein binding // identical protein binding // protein binding // identical protein binding	inferred from physical interaction // not recorded // inferred from physical interaction // not recorded // inferred from physical interaction // not recorded // inferred from physical interaction // not recorded	---	---	---	---	---	main	NONMMUT034526 6995bp;				9.15525	9.33175	8.38243	5.31287	5.30953	5.54208
TC1100002642.mm.1	Gm5431	predicted gene 5431 // predicted gene 5431 // predicted gene 5431 // predicted gene 5431 // --- // predicted gene 5431 // ---	Coding	< 1e-07	< 1e-07	243.58	20.85	11.68	up	NM_001024230 // ENSMUST00000109210 // ENSMUST00000109212 // ENSMUST00000109209 // OTTMUST00000012288 // uc007ipi.2 // OTTMUST00000012286	RefSeq // ENSEMBL // ENSEMBL // ENSEMBL // Havana transcript // UCSC Genes // Havana transcript	Mus musculus predicted gene 5431 (Gm5431), mRNA. // cdna:known chromosome:GRCm38:11:48887422:48902152:-1 gene:ENSMUSG00000058163 gene_biotype:protein_coding transcript_biotype:protein_coding // cdna:known chromosome:GRCm38:11:48888129:48902152:-1 gene:ENSMUSG00000058163 gene_biotype:protein_coding transcript_biotype:protein_coding // cdna:known chromosome:GRCm38:11:48888393:48894712:-1 gene:ENSMU…	chr11	-	48887422	48902152	GO:0008150 // GO:0008150 // GO:0008150 // GO:0008150	biological_process // biological_process // biological_process // biological_process	no biological data available // no biological data available // no biological data available // no biological data available	GO:0005575 // GO:0016020 // GO:0005575 // GO:0016020 // GO:0005575 // GO:0016020 // GO:0005575 // GO:0016020	cellular_component // membrane // cellular_component // membrane // cellular_component // membrane // cellular_component // membrane	no biological data available // inferred from electronic annotation // no biological data available // inferred from electronic annotation // no biological data available // inferred from electronic annotation // no biological data available // inferred from electronic annotation	GO:0003674 // GO:0005525 // GO:0016817 // GO:0003674 // GO:0005525 // GO:0016817 // GO:0003924 // GO:0003674 // GO:0005525 // GO:0016817 // GO:0003674 // GO:0005525 // GO:0016817	molecular_function // GTP binding // hydrolase activity, acting on acid anhydrides // molecular_function // GTP binding // hydrolase activity, acting on acid anhydrides // GTPase activity // molecular_function // GTP binding // hydrolase activity, acting on acid anhydrides // molecular_function // GTP binding // hydrolase activity, acting on acid anhydrides	no biological data available // inferred from electronic annotation // inferred from electronic annotation // no biological data available // inferred from electronic annotation // inferred from electronic annotation // inferred from electronic annotation // no biological data available // inferred from electronic annotation // inferred from electronic annotation // no biological data available /…	---	---	Pfam // Pfam // Pfam // Pfam // Pfam	IPR007743 // IPR004881 // IPR006073 // IPR007743 // IPR007743	Interferon-inducible GTPase // Ribosome biogenesis GTPase RsgA, putative // GTP binding domain // Interferon-inducible GTPase // Interferon-inducible GTPase	main	NONMMUT009535 2504bp;				7.9411	8.13612	7.73973	4.35349	4.42839	4.41094
TC0900000184.mm.1	Icam1	intercellular adhesion molecule 1 // intercellular adhesion molecule 1 // intercellular adhesion molecule 1 (Icam1), mRNA. // intercellular adhesion molecule 1 // intercellular adhesion molecule 1	Coding	< 1e-07	< 1e-07	741.55	63.54	11.67	up	NM_010493 // ENSMUST00000086399 // uc009ojw.1 // uc009ojx.1 // BC008626	RefSeq // ENSEMBL // UCSC Genes // UCSC Genes // GenBank	Mus musculus intercellular adhesion molecule 1 (Icam1), mRNA. // cdna:known chromosome:GRCm38:9:21015960:21028797:1 gene:ENSMUSG00000037405 gene_biotype:protein_coding transcript_biotype:protein_coding // intercellular adhesion molecule 1 (Icam1), mRNA. // intercellular adhesion molecule 1 // Mus musculus intercellular adhesion molecule 1, mRNA (cDNA clone MGC:6195 IMAGE:3588949), complete cds.	chr9	+	21015960	21028814	GO:0002291 // GO:0002457 // GO:0002693 // GO:0007155 // GO:0007155 // GO:0007159 // GO:0007159 // GO:0008360 // GO:0016337 // GO:0030155 // GO:0030838 // GO:0032321 // GO:0033627 // GO:0045429 // GO:0045907 // GO:0046813 // GO:0050731 // GO:0051092 // GO:0051856 // GO:0051926 // GO:0071333 // GO:0001541 // GO:0001666 // GO:0001975 // GO:0002291 // GO:0002693 // GO:0007155 // GO:0007159 // GO:0007…	T cell activation via T cell receptor contact with antigen bound to MHC molecule on antigen presenting cell // T cell antigen processing and presentation // positive regulation of cellular extravasation // cell adhesion // cell adhesion // leukocyte cell-cell adhesion // leukocyte cell-cell adhesion // regulation of cell shape // cell-cell adhesion // regulation of cell adhesion // positive regul…	not recorded // inferred from direct assay // not recorded // inferred from direct assay // not recorded // inferred from mutant phenotype // not recorded // not recorded // not recorded // inferred from direct assay // not recorded // not recorded // inferred from direct assay // not recorded // not recorded // not recorded // not recorded // not recorded // not recorded // not recorded // infer…	GO:0001772 // GO:0005615 // GO:0005886 // GO:0009897 // GO:0009986 // GO:0016020 // GO:0016021 // GO:0005615 // GO:0005886 // GO:0009986 // GO:0005634 // GO:0001772 // GO:0005615 // GO:0005886 // GO:0009897 // GO:0009986 // GO:0016020 // GO:0016021 // GO:0005886 // GO:0005615 // GO:0009986 // GO:0005634 // GO:0001772 // GO:0005615 // GO:0005886 // GO:0009897 // GO:0009986 // GO:0016020 // GO:0016…	immunological synapse // extracellular space // plasma membrane // external side of plasma membrane // cell surface // membrane // integral to membrane // extracellular space // plasma membrane // cell surface // nucleus // immunological synapse // extracellular space // plasma membrane // external side of plasma membrane // cell surface // membrane // integral to membrane // plasma membrane // e…	inferred from direct assay // not recorded // not recorded // inferred from direct assay // not recorded // inferred from electronic annotation // inferred from electronic annotation // inferred from electronic annotation // inferred from electronic annotation // inferred from electronic annotation // inferred from direct assay // inferred from direct assay // not recorded // not recorded // infe…	GO:0005178 // GO:0032403 // GO:0005178 // GO:0032403 // GO:0005178 // GO:0032403 // GO:0005515 // GO:0005178 // GO:0032403 // GO:0043498 // GO:0005178 // GO:0032403 // GO:0005178 // GO:0032403	integrin binding // protein complex binding // integrin binding // protein complex binding // integrin binding // protein complex binding // protein binding // integrin binding // protein complex binding // cell surface binding // integrin binding // protein complex binding // integrin binding // protein complex binding	not recorded // not recorded // inferred from electronic annotation // inferred from electronic annotation // not recorded // not recorded // inferred from electronic annotation // inferred from electronic annotation // inferred from electronic annotation // inferred from electronic annotation // not recorded // not recorded // inferred from electronic annotation // inferred from electronic annot…	---	---	Pfam	IPR013768	Intercellular adhesion molecule, N-terminal	main				NONMMUT068279	9.6762	9.57127	9.38792	5.69088	6.04523	6.27994
TC1100002003.mm.1	Rnf213	ring finger protein 213 // ring finger protein 213 // ring finger protein 213 // ring finger protein 213 // SubName: Full=Uncharacterized protein; Flags: Fragment; // SubName: Full=MKIAA1554 protein; Flags: Fragment; // premature mRNA for mKIAA1554 protein. // ---	Coding	< 1e-07	< 1e-07	1534.47	133.22	11.52	up	XM_001477846 // NONMMUT013008 // ENSMUST00000093902 // ENSMUST00000131035 // ENSMUST00000172235 // uc007mqo.1 // uc007mqq.2 // uc007mqr.1 // OTTMUST00000008667	RefSeq // NONCODE // ENSEMBL // ENSEMBL // ENSEMBL // UCSC Genes // UCSC Genes // UCSC Genes // Havana transcript	PREDICTED: Mus musculus ring finger protein 213 (Rnf213), mRNA. // Non-coding transcript identified by NONCODE: Linc // cdna:known chromosome:GRCm38:11:119393100:119487415:1 gene:ENSMUSG00000070327 gene_biotype:protein_coding transcript_biotype:protein_coding // cdna:known chromosome:GRCm38:11:119393100:119487418:1 gene:ENSMUSG00000070327 gene_biotype:protein_coding transcript_biotype:protein_cod…	chr11	+	119393100	119487425	GO:0006200 // GO:0016567 // GO:0016567 // GO:0051865 // GO:0006200 // GO:0051865 // GO:0016567 // GO:0006200 // GO:0051865 // GO:0006200 // GO:0016567 // GO:0051865 // GO:0016567 // GO:0006200 // GO:0051865 // GO:0016567 // GO:0051865 // GO:0006200 // GO:0051865 // GO:0006200 // GO:0016567 // GO:0006200 // GO:0016567 // GO:0051865	ATP catabolic process // protein ubiquitination // protein ubiquitination // protein autoubiquitination // ATP catabolic process // protein autoubiquitination // protein ubiquitination // ATP catabolic process // protein autoubiquitination // ATP catabolic process // protein ubiquitination // protein autoubiquitination // protein ubiquitination // ATP catabolic process // protein autoubiquitinati…	inferred from sequence or structural similarity // inferred from electronic annotation // inferred from sequence or structural similarity // inferred from sequence or structural similarity // inferred from electronic annotation // inferred from electronic annotation // inferred from electronic annotation // inferred from electronic annotation // inferred from electronic annotation // inferred fro…	GO:0005737 // GO:0005737 // GO:0005737 // GO:0005737 // GO:0005737 // GO:0005737 // GO:0005737 // GO:0005737	cytoplasm // cytoplasm // cytoplasm // cytoplasm // cytoplasm // cytoplasm // cytoplasm // cytoplasm	inferred from electronic annotation // inferred from sequence or structural similarity // inferred from electronic annotation // inferred from sequence or structural similarity // inferred from electronic annotation // inferred from sequence or structural similarity // inferred from electronic annotation // inferred from sequence or structural similarity	GO:0000166 // GO:0005524 // GO:0008270 // GO:0016874 // GO:0017111 // GO:0046872 // GO:0004842 // GO:0016887 // GO:0004842 // GO:0016887 // GO:0000166 // GO:0005524 // GO:0008270 // GO:0016874 // GO:0017111 // GO:0046872 // GO:0005515 // GO:0004842 // GO:0016887 // GO:0004842 // GO:0016887 // GO:0000166 // GO:0005524 // GO:0008270 // GO:0016874 // GO:0017111 // GO:0046872 // GO:0005515 // GO:0004…	nucleotide binding // ATP binding // zinc ion binding // ligase activity // nucleoside-triphosphatase activity // metal ion binding // ubiquitin-protein ligase activity // ATPase activity // ubiquitin-protein ligase activity // ATPase activity // nucleotide binding // ATP binding // zinc ion binding // ligase activity // nucleoside-triphosphatase activity // metal ion binding // protein binding /…	inferred from electronic annotation // inferred from electronic annotation // inferred from electronic annotation // inferred from electronic annotation // inferred from electronic annotation // inferred from electronic annotation // inferred from sequence or structural similarity // inferred from sequence or structural similarity // inferred from electronic annotation // inferred from electronic…	---	---	---	---	---	main	NR_035453 2539bp;		NONMMUT013014 3922bp;	NONMMUT013009 NONMMUT013010 NONMMUT013012	10.6791	10.6249	10.4788	7.14865	7.02295	7.04898
TC1200001041.mm.1	Serpina3i	serine (or cysteine) peptidase inhibitor, clade A, member 3I // serine (or cysteine) peptidase inhibitor, clade A, member 3I // serine (or cysteine) peptidase inhibitor, clade A, member 3I // serine (or cysteine) peptidase inhibitor, clade A, member 3I // --- // ---	Coding	< 1e-07	< 1e-07	300.51	26.56	11.32	up	NM_001199940 // ENSMUST00000109958 // ENSMUST00000109960 // uc011yrf.1 // OTTMUST00000090582 // OTTMUST00000090583	RefSeq // ENSEMBL // ENSEMBL // UCSC Genes // Havana transcript // Havana transcript	Mus musculus serine (or cysteine) peptidase inhibitor, clade A, member 3I (Serpina3i), mRNA. // cdna:putative chromosome:GRCm38:12:104263122:104269372:1 gene:ENSMUSG00000079014 gene_biotype:protein_coding transcript_biotype:protein_coding // cdna:known chromosome:GRCm38:12:104263157:104265736:1 gene:ENSMUSG00000079014 gene_biotype:protein_coding transcript_biotype:retained_intron // serine (or cy…	chr12	+	104263122	104269372	GO:0034097 // GO:0043434 // GO:0034097 // GO:0043434 // GO:0034097 // GO:0043434	response to cytokine stimulus // response to peptide hormone stimulus // response to cytokine stimulus // response to peptide hormone stimulus // response to cytokine stimulus // response to peptide hormone stimulus	inferred from direct assay // inferred from direct assay // inferred from direct assay // inferred from direct assay // inferred from direct assay // inferred from direct assay	GO:0005575 // GO:0005615 // GO:0005575 // GO:0005615	cellular_component // extracellular space // cellular_component // extracellular space	no biological data available // inferred from electronic annotation // no biological data available // inferred from electronic annotation	GO:0003674 // GO:0003674 // GO:0004867	molecular_function // molecular_function // serine-type endopeptidase inhibitor activity	no biological data available // no biological data available // inferred from electronic annotation	---	---	Pfam	IPR023796	Serpin domain	main	NONMMUT015496 8717bp;		NONMMUT015497 993bp;		8.32589	8.33812	8.06202	4.84196	4.6849	4.71354
TC1700002788.mm.1	H2-Q8	histocompatibility 2, Q region locus 8 // histocompatibility 2, Q region locus 6 // histocompatibility 2, Q region locus 6 // histocompatibility 2, Q region locus 8 // histocompatibility 2, Q region locus 6 // histocompatibility 2, Q region locus 8 // histocompatibility 2, Q region locus 6 // histocompatibility 2, Q region locus 6 (H2-Q6), mRNA. // ---	Coding	< 1e-07	< 1e-07	1722.32	153.18	11.24	up	NM_023124 // NM_207648 // ENSMUST00000174699 // ENSMUST00000113879 // uc008chp.1 // uc008chr.1 // BC156754 // OTTMUST00000095868	RefSeq // RefSeq // ENSEMBL // ENSEMBL // UCSC Genes // UCSC Genes // GenBank // Havana transcript	Mus musculus histocompatibility 2, Q region locus 8 (H2-Q8), mRNA. // Mus musculus histocompatibility 2, Q region locus 6 (H2-Q6), mRNA. // cdna:known chromosome:GRCm38:17:35424850:35430055:1 gene:ENSMUSG00000073409 gene_biotype:protein_coding transcript_biotype:protein_coding // cdna:known chromosome:GRCm38:17:35424877:35428361:1 gene:ENSMUSG00000073409 gene_biotype:protein_coding transcript_bio…	chr17	+	35424847	35430055	GO:0001916 // GO:0002474 // GO:0006955 // GO:0019882 // GO:0001916 // GO:0002474 // GO:0006955 // GO:0019882 // GO:0006955 // GO:0019882 // GO:0001916 // GO:0002474 // GO:0006955 // GO:0019882 // GO:0001916 // GO:0002474	positive regulation of T cell mediated cytotoxicity // antigen processing and presentation of peptide antigen via MHC class I // immune response // antigen processing and presentation // positive regulation of T cell mediated cytotoxicity // antigen processing and presentation of peptide antigen via MHC class I // immune response // antigen processing and presentation // immune response // antige…	inferred from electronic annotation // inferred from electronic annotation // inferred from electronic annotation // inferred from electronic annotation // inferred from electronic annotation // inferred from electronic annotation // inferred from electronic annotation // inferred from electronic annotation // inferred from electronic annotation // inferred from electronic annotation // inferred …	GO:0016020 // GO:0042612 // GO:0016020 // GO:0042612 // GO:0016020 // GO:0042612 // GO:0016020 // GO:0042612	membrane // MHC class I protein complex // membrane // MHC class I protein complex // membrane // MHC class I protein complex // membrane // MHC class I protein complex	inferred from electronic annotation // inferred from electronic annotation // inferred from electronic annotation // inferred from electronic annotation // inferred from electronic annotation // inferred from electronic annotation // inferred from electronic annotation // inferred from electronic annotation	GO:0042605 // GO:0005102 // GO:0030881 // GO:0042277 // GO:0046982 // GO:0042605 // GO:0005102 // GO:0030881 // GO:0042277 // GO:0046982 // GO:0005515 // GO:0042605 // GO:0005102 // GO:0030881 // GO:0042277 // GO:0046982 // GO:0005515 // GO:0042605	peptide antigen binding // receptor binding // beta-2-microglobulin binding // peptide binding // protein heterodimerization activity // peptide antigen binding // receptor binding // beta-2-microglobulin binding // peptide binding // protein heterodimerization activity // protein binding // peptide antigen binding // receptor binding // beta-2-microglobulin binding // peptide binding // protein …	inferred from electronic annotation // not recorded // not recorded // not recorded // not recorded // inferred from electronic annotation // not recorded // not recorded // not recorded // not recorded // inferred from electronic annotation // inferred from electronic annotation // not recorded // not recorded // not recorded // not recorded // inferred from electronic annotation // inferred fro…	---	---	Pfam // Pfam // Pfam // Pfam	IPR001039 // IPR003597 // IPR001039 // IPR003597	MHC class I, alpha chain, alpha1/alpha2 // Immunoglobulin C1-set // MHC class I, alpha chain, alpha1/alpha2 // Immunoglobulin C1-set	main			NONMMUT029442 9100bp;		10.7046	10.7777	10.8003	7.12106	7.27408	7.42969
TC1600000346.mm.1	Rtp4	receptor transporter protein 4 // receptor transporter protein 4 // receptor transporter protein 4 // receptor transporter protein 4	Coding	< 1e-07	< 1e-07	699.27	62.86	11.12	up	NM_023386 // ENSMUST00000038423 // uc007ytw.2 // BC024872	RefSeq // ENSEMBL // UCSC Genes // GenBank	Mus musculus receptor transporter protein 4 (Rtp4), mRNA. // cdna:known chromosome:GRCm38:16:23609919:23614222:1 gene:ENSMUSG00000033355 gene_biotype:protein_coding transcript_biotype:protein_coding // receptor transporter protein 4 // Mus musculus receptor transporter protein 4, mRNA (cDNA clone MGC:28210 IMAGE:3990099), complete cds.	chr16	+	23609919	23614222	GO:0001580 // GO:0006612 // GO:0001580 // GO:0006612 // GO:0001580 // GO:0006612 // GO:0001580 // GO:0006612 // GO:0001580 // GO:0006612 // GO:0001580 // GO:0006612	detection of chemical stimulus involved in sensory perception of bitter taste // protein targeting to membrane // detection of chemical stimulus involved in sensory perception of bitter taste // protein targeting to membrane // detection of chemical stimulus involved in sensory perception of bitter taste // protein targeting to membrane // detection of chemical stimulus involved in sensory percep…	not recorded // not recorded // inferred from electronic annotation // inferred from electronic annotation // not recorded // not recorded // inferred from electronic annotation // inferred from electronic annotation // not recorded // not recorded // inferred from electronic annotation // inferred from electronic annotation	GO:0005737 // GO:0016020 // GO:0016021 // GO:0005737 // GO:0005737 // GO:0016020 // GO:0016021 // GO:0005737 // GO:0005737 // GO:0016020 // GO:0016021 // GO:0005737	cytoplasm // membrane // integral to membrane // cytoplasm // cytoplasm // membrane // integral to membrane // cytoplasm // cytoplasm // membrane // integral to membrane // cytoplasm	not recorded // inferred from electronic annotation // inferred from electronic annotation // inferred from electronic annotation // not recorded // inferred from electronic annotation // inferred from electronic annotation // inferred from electronic annotation // not recorded // inferred from electronic annotation // inferred from electronic annotation // inferred from electronic annotation	GO:0003674 // GO:0005515 // GO:0003674 // GO:0003674	molecular_function // protein binding // molecular_function // molecular_function	no biological data available // inferred from electronic annotation // no biological data available // no biological data available	---	---	---	---	---	main	NONMMUT025999 3782bp;				9.50542	9.47261	9.40329	6.18885	5.88867	5.89209
TC1700002352.mm.1	C3	complement component 3 // complement C3-like // complement component 3 // complement C3-like // complement component 3 // complement C3-like // complement component 3 // complement C3-like // complement component 3 // complement component 3 // complement component 3 // --- // --- // --- // ---	Coding	< 1e-07	< 1e-07	347.56	31.35	11.09	up	NM_009778 // ENSMUST00000024988 // ENSMUST00000177425 // ENSMUST00000177046 // ENSMUST00000176457 // uc008deg.1 // BC043338 // OTTMUST00000110561 // OTTMUST00000110723 // OTTMUST00000110721 // OTTMUST00000110722	RefSeq // ENSEMBL // ENSEMBL // ENSEMBL // ENSEMBL // UCSC Genes // GenBank // Havana transcript // Havana transcript // Havana transcript // Havana transcript	Mus musculus complement component 3 (C3), mRNA. // cdna:known chromosome:GRCm38:17:57203970:57228136:-1 gene:ENSMUSG00000024164 gene_biotype:protein_coding transcript_biotype:protein_coding // cdna:putative chromosome:GRCm38:17:57204007:57222827:-1 gene:ENSMUSG00000024164 gene_biotype:protein_coding transcript_biotype:protein_coding // cdna:putative chromosome:GRCm38:17:57206217:57228003:-1 gene:…	chr17	-	57203970	57228136	GO:0001798 // GO:0001934 // GO:0001970 // GO:0006629 // GO:0006631 // GO:0006954 // GO:0006956 // GO:0006956 // GO:0006957 // GO:0006958 // GO:0007596 // GO:0010575 // GO:0010828 // GO:0010866 // GO:0010884 // GO:0045087 // GO:0045745 // GO:0045766 // GO:0048639 // GO:0050766 // GO:0070374 // GO:0001934 // GO:0001934 // GO:0006956 // GO:0010575 // GO:0010828 // GO:0010828 // GO:0010866 // GO:0010…	positive regulation of type IIa hypersensitivity // positive regulation of protein phosphorylation // positive regulation of activation of membrane attack complex // lipid metabolic process // fatty acid metabolic process // inflammatory response // complement activation // complement activation // complement activation, alternative pathway // complement activation, classical pathway // blood coa…	inferred from mutant phenotype // not recorded // inferred from mutant phenotype // inferred from electronic annotation // inferred from electronic annotation // inferred from electronic annotation // inferred from direct assay // not recorded // inferred from electronic annotation // inferred from electronic annotation // not recorded // not recorded // not recorded // not recorded // not record…	GO:0005576 // GO:0005615 // GO:0070062 // GO:0005615 // GO:0070062 // GO:0005576 // GO:0005615 // GO:0070062 // GO:0005615 // GO:0070062 // GO:0005576 // GO:0005615 // GO:0070062 // GO:0005615 // GO:0070062 // GO:0005576 // GO:0005615 // GO:0070062 // GO:0005615 // GO:0070062 // GO:0005576 // GO:0005615 // GO:0070062 // GO:0005615 // GO:0070062 // GO:0005576 // GO:0005615 // GO:0070062 // GO:0005…	extracellular region // extracellular space // extracellular vesicular exosome // extracellular space // extracellular vesicular exosome // extracellular region // extracellular space // extracellular vesicular exosome // extracellular space // extracellular vesicular exosome // extracellular region // extracellular space // extracellular vesicular exosome // extracellular space // extracellular …	inferred from electronic annotation // not recorded // not recorded // inferred from electronic annotation // inferred from electronic annotation // inferred from electronic annotation // not recorded // not recorded // inferred from electronic annotation // inferred from electronic annotation // inferred from electronic annotation // not recorded // not recorded // inferred from electronic annot…	GO:0004866 // GO:0005515 // GO:0008289 // GO:0031715 // GO:0048037 // GO:0031715 // GO:0031715 // GO:0004866 // GO:0005515 // GO:0008289 // GO:0031715 // GO:0048037 // GO:0005515 // GO:0031715 // GO:0031715 // GO:0004866 // GO:0005515 // GO:0008289 // GO:0031715 // GO:0048037 // GO:0031715 // GO:0031715 // GO:0004866 // GO:0005515 // GO:0008289 // GO:0031715 // GO:0048037 // GO:0031715 // GO:0031…	endopeptidase inhibitor activity // protein binding // lipid binding // C5L2 anaphylatoxin chemotactic receptor binding // cofactor binding // C5L2 anaphylatoxin chemotactic receptor binding // C5L2 anaphylatoxin chemotactic receptor binding // endopeptidase inhibitor activity // protein binding // lipid binding // C5L2 anaphylatoxin chemotactic receptor binding // cofactor binding // protein bin…	inferred from electronic annotation // inferred from physical interaction // not recorded // not recorded // not recorded // inferred from electronic annotation // inferred from sequence or structural similarity // inferred from electronic annotation // inferred from physical interaction // not recorded // not recorded // not recorded // inferred from electronic annotation // inferred from sequen…	GenMAPP // GenMAPP // GenMAPP // GenMAPP // GenMAPP // GenMAPP	Complement_Activation_Classical // Complement_Activation_Classical // Complement_Activation_Classical // Complement_Activation_Classical // Complement_Activation_Classical // Complement_Activation_Classical	Pfam // Pfam // Pfam // Pfam // Pfam // Pfam // Pfam // Pfam // Pfam // Pfam	IPR000020 // IPR001599 // IPR002890 // IPR009048 // IPR011625 // IPR011626 // IPR018933 // IPR019565 // IPR011625 // IPR009048	Anaphylatoxin/fibulin // Alpha-2-macroglobulin // Alpha-2-macroglobulin, N-terminal // Alpha-macroglobulin, receptor-binding // Alpha-2-macroglobulin, N-terminal 2 // A-macroglobulin complement component // Netrin module, non-TIMP type // Alpha-2-macroglobulin, thiol-ester bond-forming // Alpha-2-macroglobulin, N-terminal 2 // Alpha-macroglobulin, receptor-binding	main		NR_105944			8.70303	8.47265	8.17994	4.93888	5.06705	4.95271
TC0800002146.mm.1	Tlr3	toll-like receptor 3 // toll-like receptor 3 // toll-like receptor 3 // toll-like receptor 3 (Tlr3), mRNA. // toll-like receptor 3 // toll-like receptor 3 // toll-like receptor 3	Coding	3e-07	2.66e-05	285.05	25.73	11.08	up	NM_126166 // ENSMUST00000034056 // ENSMUST00000167106 // uc009loy.1 // uc009loz.1 // uc009lpa.1 // BC099937	RefSeq // ENSEMBL // ENSEMBL // UCSC Genes // UCSC Genes // UCSC Genes // GenBank	Mus musculus toll-like receptor 3 (Tlr3), mRNA. // cdna:known chromosome:GRCm38:8:45395665:45410539:-1 gene:ENSMUSG00000031639 gene_biotype:protein_coding transcript_biotype:protein_coding // cdna:known chromosome:GRCm38:8:45395911:45410608:-1 gene:ENSMUSG00000031639 gene_biotype:protein_coding transcript_biotype:protein_coding // toll-like receptor 3 (Tlr3), mRNA. // toll-like receptor 3 // toll…	chr8	-	45395665	45410608	GO:0001819 // GO:0001934 // GO:0002224 // GO:0002282 // GO:0002756 // GO:0006952 // GO:0006954 // GO:0007165 // GO:0007252 // GO:0009615 // GO:0032481 // GO:0032722 // GO:0032728 // GO:0032735 // GO:0032755 // GO:0032755 // GO:0032755 // GO:0032757 // GO:0032760 // GO:0032760 // GO:0034123 // GO:0034138 // GO:0034346 // GO:0042346 // GO:0043123 // GO:0043123 // GO:0043123 // GO:0043330 // GO:0043…	positive regulation of cytokine production // positive regulation of protein phosphorylation // toll-like receptor signaling pathway // microglial cell activation involved in immune response // MyD88-independent toll-like receptor signaling pathway // defense response // inflammatory response // signal transduction // I-kappaB phosphorylation // response to virus // positive regulation of type I …	inferred from electronic annotation // not recorded // not recorded // not recorded // inferred from electronic annotation // inferred from mutant phenotype // inferred from electronic annotation // inferred from electronic annotation // not recorded // inferred from mutant phenotype // inferred from direct assay // not recorded // inferred from direct assay // inferred from direct assay // infer…	GO:0005622 // GO:0005737 // GO:0005768 // GO:0005783 // GO:0009986 // GO:0016020 // GO:0016021 // GO:0005737 // GO:0005789 // GO:0010008 // GO:0005622 // GO:0005737 // GO:0005768 // GO:0005783 // GO:0009986 // GO:0016020 // GO:0016021 // GO:0005622 // GO:0005737 // GO:0005789 // GO:0009986 // GO:0010008 // GO:0005622 // GO:0005737 // GO:0005768 // GO:0005783 // GO:0009986 // GO:0016020 // GO:0016…	intracellular // cytoplasm // endosome // endoplasmic reticulum // cell surface // membrane // integral to membrane // cytoplasm // endoplasmic reticulum membrane // endosome membrane // intracellular // cytoplasm // endosome // endoplasmic reticulum // cell surface // membrane // integral to membrane // intracellular // cytoplasm // endoplasmic reticulum membrane // cell surface // endosome memb…	not recorded // not recorded // inferred from electronic annotation // inferred from electronic annotation // not recorded // inferred from electronic annotation // inferred from electronic annotation // inferred from electronic annotation // inferred from electronic annotation // inferred from electronic annotation // not recorded // not recorded // inferred from electronic annotation // inferre…	GO:0003723 // GO:0003725 // GO:0004872 // GO:0004888 // GO:0005515 // GO:0003725 // GO:0003725 // GO:0003723 // GO:0003725 // GO:0004872 // GO:0004888 // GO:0005515 // GO:0003725 // GO:0004872 // GO:0003725 // GO:0003723 // GO:0003725 // GO:0004872 // GO:0004888 // GO:0005515 // GO:0003725 // GO:0004872 // GO:0003725 // GO:0003723 // GO:0003725 // GO:0004872 // GO:0004888 // GO:0005515 // GO:0003…	RNA binding // double-stranded RNA binding // receptor activity // transmembrane signaling receptor activity // protein binding // double-stranded RNA binding // double-stranded RNA binding // RNA binding // double-stranded RNA binding // receptor activity // transmembrane signaling receptor activity // protein binding // double-stranded RNA binding // receptor activity // double-stranded RNA bin…	inferred from electronic annotation // not recorded // not recorded // inferred from electronic annotation // inferred from physical interaction // inferred from electronic annotation // inferred from sequence or structural similarity // inferred from electronic annotation // not recorded // not recorded // inferred from electronic annotation // inferred from physical interaction // inferred from…	---	---	Pfam // Pfam // Pfam // Pfam	IPR000157 // IPR001611 // IPR000157 // IPR001611	Toll/interleukin-1 receptor homology (TIR) domain // Leucine-rich repeat // Toll/interleukin-1 receptor homology (TIR) domain // Leucine-rich repeat	main				XR_105208	8.48112	8.45241	7.56393	4.86969	4.65684	4.57658
TC1900001123.mm.1	AW112010	expressed sequence AW112010 // expressed sequence AW112010 // novel protein	Coding	< 1e-07	< 1e-07	90.54	8.18	11.07	up	NM_001177351 // NR_102366 // ENSMUST00000099676 // uc008grn.2 // OTTMUST00000117372	MGI/Jackson Lab // RefSeq // ENSEMBL // UCSC Genes // Havana transcript	expressed sequence AW112010 // Mus musculus expressed sequence AW112010 (AW112010), non-coding RNA. // cdna:known chromosome:GRCm38:19:11047613:11050566:-1 gene:ENSMUSG00000075010 gene_biotype:protein_coding transcript_biotype:protein_coding // expressed sequence AW112010 // novel protein	chr19	-	11047612	11050566	GO:0008150 // GO:0008150	biological_process // biological_process	no biological data available // no biological data available	GO:0005575 // GO:0005575	cellular_component // cellular_component	no biological data available // no biological data available	GO:0003674 // GO:0003674	molecular_function // molecular_function	no biological data available // no biological data available	---	---	---	---	---	main					6.51061	6.88555	6.13773	3.00012	3.29759	2.8466
TC1100002648.mm.1	9930111J21Rik2	RIKEN cDNA 9930111J21 gene 2 // RIKEN cDNA 9930111J21 gene 2 // RIKEN cDNA 9930111J21 gene 2 // RIKEN cDNA 9930111J21 gene 2 // --- // --- // RIKEN cDNA 9930111J21 gene 2 // ---	Coding	< 1e-07	< 1e-07	139.28	12.95	10.75	up	NM_173434 // ENSMUST00000101295 // ENSMUST00000093152 // ENSMUST00000132768 // OTTMUST00000012303 // BC119805_2 // BC122882_2 // OTTMUST00000012313 // uc007ipn.1 // OTTMUST00000012302	RefSeq // ENSEMBL // ENSEMBL // ENSEMBL // Havana transcript // GenBank // GenBank // Havana transcript // UCSC Genes // Havana transcript	Mus musculus RIKEN cDNA 9930111J21 gene 2 (9930111J21Rik2), mRNA. // cdna:novel chromosome:GRCm38:11:49015874:49051225:-1 gene:ENSMUSG00000069892 gene_biotype:protein_coding transcript_biotype:protein_coding // cdna:putative chromosome:GRCm38:11:49037660:49051242:-1 gene:ENSMUSG00000069892 gene_biotype:protein_coding transcript_biotype:protein_coding // cdna:novel chromosome:GRCm38:11:49039421:49…	chr11	-	49015874	49051242	---	---	---	GO:0016020 // GO:0016020 // GO:0016020 // GO:0016020	membrane // membrane // membrane // membrane	inferred from electronic annotation // inferred from electronic annotation // inferred from electronic annotation // inferred from electronic annotation	GO:0005525 // GO:0016817 // GO:0003924 // GO:0005525 // GO:0016817 // GO:0003924 // GO:0005525 // GO:0016817 // GO:0005525 // GO:0016817	GTP binding // hydrolase activity, acting on acid anhydrides // GTPase activity // GTP binding // hydrolase activity, acting on acid anhydrides // GTPase activity // GTP binding // hydrolase activity, acting on acid anhydrides // GTP binding // hydrolase activity, acting on acid anhydrides	inferred from electronic annotation // inferred from electronic annotation // inferred from electronic annotation // inferred from electronic annotation // inferred from electronic annotation // inferred from electronic annotation // inferred from electronic annotation // inferred from electronic annotation // inferred from electronic annotation // inferred from electronic annotation	---	---	Pfam // Pfam // Pfam // Pfam // Pfam // Pfam // Pfam	IPR004881 // IPR006073 // IPR007743 // IPR004881 // IPR006073 // IPR007743 // IPR007743	Ribosome biogenesis GTPase RsgA, putative // GTP binding domain // Interferon-inducible GTPase // Ribosome biogenesis GTPase RsgA, putative // GTP binding domain // Interferon-inducible GTPase // Interferon-inducible GTPase	main	NONMMUT009539 5952bp;		NONMMUT009538 1089bp;		7.29261	7.16207	6.94298	3.59601	3.74729	3.78985
TC0100001338.mm.1	Ptgs2	prostaglandin-endoperoxide synthase 2 // prostaglandin-endoperoxide synthase 2 // prostaglandin-endoperoxide synthase 2 // prostaglandin-endoperoxide synthase 2	Coding	< 1e-07	< 1e-07	207.4	20.45	10.14	up	NM_011198 // ENSMUST00000035065 // uc007cxv.1 // BC052900	RefSeq // ENSEMBL // UCSC Genes // GenBank	Mus musculus prostaglandin-endoperoxide synthase 2 (Ptgs2), mRNA. // cdna:known chromosome:GRCm38:1:150100124:150108010:1 gene:ENSMUSG00000032487 gene_biotype:protein_coding transcript_biotype:protein_coding // prostaglandin-endoperoxide synthase 2 // Mus musculus prostaglandin-endoperoxide synthase 2, mRNA (cDNA clone MGC:60582 IMAGE:30059181), complete cds.	chr1	+	150100124	150108017	GO:0001516 // GO:0001516 // GO:0001525 // GO:0006629 // GO:0006631 // GO:0006633 // GO:0006693 // GO:0006954 // GO:0006979 // GO:0007566 // GO:0007612 // GO:0007613 // GO:0008217 // GO:0008284 // GO:0008285 // GO:0010575 // GO:0010942 // GO:0019233 // GO:0019371 // GO:0019371 // GO:0030216 // GO:0030282 // GO:0030728 // GO:0031622 // GO:0031622 // GO:0031915 // GO:0032227 // GO:0032496 // GO:0034…	prostaglandin biosynthetic process // prostaglandin biosynthetic process // angiogenesis // lipid metabolic process // fatty acid metabolic process // fatty acid biosynthetic process // prostaglandin metabolic process // inflammatory response // response to oxidative stress // embryo implantation // learning // memory // regulation of blood pressure // positive regulation of cell proliferation //…	inferred from direct assay // not recorded // not recorded // inferred from electronic annotation // inferred from electronic annotation // inferred from electronic annotation // inferred from electronic annotation // not recorded // inferred from electronic annotation // not recorded // not recorded // not recorded // inferred from mutant phenotype // not recorded // not recorded // not recorded…	GO:0005634 // GO:0005737 // GO:0005737 // GO:0005783 // GO:0005901 // GO:0016020 // GO:0043005 // GO:0043005 // GO:0043231 // GO:0043234 // GO:0005789 // GO:0031090 // GO:0043005 // GO:0043005 // GO:0043234 // GO:0005634 // GO:0005737 // GO:0005737 // GO:0005783 // GO:0005901 // GO:0016020 // GO:0043005 // GO:0043005 // GO:0043231 // GO:0043234 // GO:0005789 // GO:0005901 // GO:0043005 // GO:0043…	nucleus // cytoplasm // cytoplasm // endoplasmic reticulum // caveola // membrane // neuron projection // neuron projection // intracellular membrane-bounded organelle // protein complex // endoplasmic reticulum membrane // organelle membrane // neuron projection // neuron projection // protein complex // nucleus // cytoplasm // cytoplasm // endoplasmic reticulum // caveola // membrane // neuron …	inferred from direct assay // inferred from direct assay // not recorded // inferred from electronic annotation // not recorded // inferred from electronic annotation // inferred from direct assay // not recorded // inferred from electronic annotation // not recorded // inferred from electronic annotation // inferred from electronic annotation // inferred from electronic annotation // --- // infe…	GO:0004601 // GO:0004666 // GO:0004666 // GO:0008289 // GO:0016491 // GO:0016702 // GO:0019899 // GO:0020037 // GO:0042803 // GO:0046872 // GO:0004666 // GO:0008289 // GO:0016702 // GO:0019899 // GO:0020037 // GO:0051213 // GO:0004601 // GO:0004666 // GO:0004666 // GO:0008289 // GO:0016491 // GO:0016702 // GO:0019899 // GO:0020037 // GO:0042803 // GO:0046872 // GO:0005515 // GO:0004666 // GO:0008…	peroxidase activity // prostaglandin-endoperoxide synthase activity // prostaglandin-endoperoxide synthase activity // lipid binding // oxidoreductase activity // oxidoreductase activity, acting on single donors with incorporation of molecular oxygen, incorporation of two atoms of oxygen // enzyme binding // heme binding // protein homodimerization activity // metal ion binding // prostaglandin-e…	inferred from electronic annotation // inferred from direct assay // not recorded // not recorded // inferred from electronic annotation // not recorded // not recorded // inferred from direct assay // inferred from physical interaction // inferred from electronic annotation // inferred from electronic annotation // inferred from electronic annotation // inferred from electronic annotation // inf…	GenMAPP // GenMAPP // GenMAPP // GenMAPP // GenMAPP // GenMAPP	Eicosanoid_Synthesis // Prostaglandin_synthesis_regulation // Eicosanoid_Synthesis // Prostaglandin_synthesis_regulation // Eicosanoid_Synthesis // Prostaglandin_synthesis_regulation	Pfam	IPR002007	Haem peroxidase, animal	main					7.80455	7.80337	7.51306	4.34044	4.34052	4.42853
TC0400002251.mm.1	Ripk2	receptor (TNFRSF)-interacting serine-threonine kinase 2 // receptor (TNFRSF)-interacting serine-threonine kinase 2 // receptor (TNFRSF)-interacting serine-threonine kinase 2 // receptor (TNFRSF)-interacting serine-threonine kinase 2 // receptor (TNFRSF)-interacting serine-threonine kinase 2 (Ripk2), mRNA. // receptor (TNFRSF)-interacting serine-threonine kinase 2 // --- // ---	Coding	< 1e-07	< 1e-07	1163.15	116.65	9.97	up	NM_138952 // ENSMUST00000037035 // ENSMUST00000183871 // uc008sbr.1 // uc012das.1 // BC069878 // OTTMUST00000010515 // OTTMUST00000010516	RefSeq // ENSEMBL // ENSEMBL // UCSC Genes // UCSC Genes // GenBank // Havana transcript // Havana transcript	Mus musculus receptor (TNFRSF)-interacting serine-threonine kinase 2 (Ripk2), mRNA. // cdna:known chromosome:GRCm38:4:16122733:16163647:-1 gene:ENSMUSG00000041135 gene_biotype:protein_coding transcript_biotype:protein_coding // receptor (TNFRSF)-interacting serine-threonine kinase 2 // receptor (TNFRSF)-interacting serine-threonine kinase 2 // receptor (TNFRSF)-interacting serine-threonine kinase…	chr4	-	16122733	16163647	GO:0001961 // GO:0002250 // GO:0002827 // GO:0006468 // GO:0006915 // GO:0007249 // GO:0016310 // GO:0031398 // GO:0031663 // GO:0032722 // GO:0032729 // GO:0032743 // GO:0032755 // GO:0032760 // GO:0032874 // GO:0033091 // GO:0034134 // GO:0034142 // GO:0042098 // GO:0042981 // GO:0043065 // GO:0043123 // GO:0043123 // GO:0043281 // GO:0043330 // GO:0045087 // GO:0045627 // GO:0046330 // GO:0046…	positive regulation of cytokine-mediated signaling pathway // adaptive immune response // positive regulation of T-helper 1 type immune response // protein phosphorylation // apoptotic process // I-kappaB kinase/NF-kappaB cascade // phosphorylation // positive regulation of protein ubiquitination // lipopolysaccharide-mediated signaling pathway // positive regulation of chemokine production // po…	inferred from mutant phenotype // inferred from mutant phenotype // inferred from mutant phenotype // inferred from electronic annotation // inferred from electronic annotation // inferred from mutant phenotype // inferred from electronic annotation // not recorded // inferred from mutant phenotype // inferred from mutant phenotype // inferred from mutant phenotype // inferred from mutant phenoty…	GO:0005622 // GO:0005737 // GO:0005737 // GO:0005829 // GO:0005622 // GO:0005737 // GO:0005829 // GO:0005737 // GO:0005622 // GO:0005737 // GO:0005737 // GO:0005829	intracellular // cytoplasm // cytoplasm // cytosol // intracellular // cytoplasm // cytosol // cytoplasm // intracellular // cytoplasm // cytoplasm // cytosol	inferred from electronic annotation // not recorded // inferred from electronic annotation // traceable author statement // inferred from electronic annotation // not recorded // traceable author statement // inferred from electronic annotation // inferred from electronic annotation // not recorded // inferred from electronic annotation // traceable author statement	GO:0000166 // GO:0004672 // GO:0004674 // GO:0004715 // GO:0005524 // GO:0016301 // GO:0016740 // GO:0016772 // GO:0030274 // GO:0042803 // GO:0050700 // GO:0030274 // GO:0042803 // GO:0050700 // GO:0000166 // GO:0004672 // GO:0004674 // GO:0004715 // GO:0005524 // GO:0016301 // GO:0016740 // GO:0016772 // GO:0030274 // GO:0042803 // GO:0050700 // GO:0005515 // GO:0004713 // GO:0030274 // GO:0042…	nucleotide binding // protein kinase activity // protein serine/threonine kinase activity // non-membrane spanning protein tyrosine kinase activity // ATP binding // kinase activity // transferase activity // transferase activity, transferring phosphorus-containing groups // LIM domain binding // protein homodimerization activity // CARD domain binding // LIM domain binding // protein homodimeriz…	inferred from electronic annotation // inferred from electronic annotation // inferred from electronic annotation // inferred from electronic annotation // inferred from electronic annotation // inferred from electronic annotation // inferred from electronic annotation // inferred from electronic annotation // not recorded // not recorded // not recorded // inferred from electronic annotation // …	---	---	Pfam // Pfam // Pfam	IPR000719 // IPR001245 // IPR001315	Protein kinase, catalytic domain // Serine-threonine/tyrosine-protein kinase catalytic domain // Caspase Recruitment	main		ENSMUST00000175054	ENSMUST00000117437 1845bp;		10.3074	10.268	10.0083	7.05846	6.78083	6.80645
TC1100004292.mm.1	9930111J21Rik1	RIKEN cDNA 9930111J21 gene 1 // RIKEN cDNA 9930111J21 gene 1 // RIKEN cDNA 9930111J21 gene 2 // RIKEN cDNA 9930111J21 gene 1 // RIKEN cDNA 9930111J21 gene 2 // RIKEN cDNA 9930111J21 gene 1 // RIKEN cDNA 9930111J21 gene 2 // --- // --- // RIKEN cDNA 9930111J21 gene 2 // RIKEN cDNA 9930111J21 gene 2 // RIKEN cDNA 9930111J21 gene 1 // RIKEN cDNA 9930111J21 gene 1 // ---	Coding	< 1e-07	< 1e-07	137.89	14.07	9.8	up	NM_001114679 // NM_173434_2 // ENSMUST00000097494 // ENSMUST00000093153 // ENSMUST00000141200 // OTTMUST00000012299 // OTTMUST00000012297 // BC119805 // BC122882 // uc011xtz.1 // uc007ipl.1 // OTTMUST00000012298	RefSeq // RefSeq // ENSEMBL // ENSEMBL // ENSEMBL // Havana transcript // Havana transcript // GenBank // GenBank // UCSC Genes // UCSC Genes // Havana transcript	Mus musculus RIKEN cDNA 9930111J21 gene 1 (9930111J21Rik1), mRNA. // RIKEN cDNA 9930111J21 gene 2 // cdna:known chromosome:GRCm38:11:48946150:48979381:-1 gene:ENSMUSG00000069893 gene_biotype:protein_coding transcript_biotype:protein_coding // cdna:putative chromosome:GRCm38:11:48965817:48979398:-1 gene:ENSMUSG00000069893 gene_biotype:protein_coding transcript_biotype:protein_coding // cdna:known …	chr11	-	48946150	48979398	---	---	---	GO:0016020 // GO:0016020 // GO:0016020 // GO:0016020 // GO:0016020 // GO:0016020	membrane // membrane // membrane // membrane // membrane // membrane	inferred from electronic annotation // inferred from electronic annotation // inferred from electronic annotation // inferred from electronic annotation // inferred from electronic annotation // inferred from electronic annotation	GO:0005525 // GO:0016817 // GO:0003924 // GO:0005525 // GO:0016817 // GO:0003924 // GO:0005525 // GO:0016817 // GO:0005525 // GO:0016817 // GO:0005525 // GO:0016817 // GO:0005525 // GO:0016817	GTP binding // hydrolase activity, acting on acid anhydrides // GTPase activity // GTP binding // hydrolase activity, acting on acid anhydrides // GTPase activity // GTP binding // hydrolase activity, acting on acid anhydrides // GTP binding // hydrolase activity, acting on acid anhydrides // GTP binding // hydrolase activity, acting on acid anhydrides // GTP binding // hydrolase activity, acting…	inferred from electronic annotation // inferred from electronic annotation // inferred from electronic annotation // inferred from electronic annotation // inferred from electronic annotation // inferred from electronic annotation // inferred from electronic annotation // inferred from electronic annotation // inferred from electronic annotation // inferred from electronic annotation // inferred …	---	---	Pfam // Pfam // Pfam // Pfam // Pfam // Pfam // Pfam	IPR004881 // IPR006073 // IPR007743 // IPR004881 // IPR006073 // IPR007743 // IPR007743	Ribosome biogenesis GTPase RsgA, putative // GTP binding domain // Interferon-inducible GTPase // Ribosome biogenesis GTPase RsgA, putative // GTP binding domain // Interferon-inducible GTPase // Interferon-inducible GTPase	main		NONMMUT009535 NONMMUT009536			7.25361	7.2219	6.87872	3.80126	3.82761	3.86185
TC1100003779.mm.1	Dhx58	DEXH (Asp-Glu-X-His) box polypeptide 58 // DEXH (Asp-Glu-X-His) box polypeptide 58 // DEXH (Asp-Glu-X-His) box polypeptide 58 // DEXH (Asp-Glu-X-His) box polypeptide 58 // DEXH (Asp-Glu-X-His) box polypeptide 58 // DEXH (Asp-Glu-X-His) box polypeptide 58 // DEXH (Asp-Glu-X-His) box polypeptide 58 // --- // --- // DEXH (Asp-Glu-X-His) box polypeptide 58 // DEXH (Asp-Glu-X-His) box polypeptide 58 /…	Coding	< 1e-07	< 1e-07	421.07	43.4	9.7	up	NM_030150 // ENSMUST00000017974 // ENSMUST00000140543 // ENSMUST00000149869 // ENSMUST00000126167 // ENSMUST00000150656 // ENSMUST00000132930 // OTTMUST00000004170 // OTTMUST00000004171 // BC029209 // uc007llx.1 // OTTMUST00000004175 // OTTMUST00000004174 // OTTMUST00000004172 // OTTMUST00000004173 // uc007lly.1	RefSeq // ENSEMBL // ENSEMBL // ENSEMBL // ENSEMBL // ENSEMBL // ENSEMBL // Havana transcript // Havana transcript // GenBank // UCSC Genes // Havana transcript // Havana transcript // Havana transcript // Havana transcript // UCSC Genes	Mus musculus DEXH (Asp-Glu-X-His) box polypeptide 58 (Dhx58), mRNA. // cdna:known chromosome:GRCm38:11:100694884:100704271:-1 gene:ENSMUSG00000017830 gene_biotype:protein_coding transcript_biotype:protein_coding // cdna:known chromosome:GRCm38:11:100695063:100696620:-1 gene:ENSMUSG00000017830 gene_biotype:protein_coding transcript_biotype:processed_transcript // cdna:known chromosome:GRCm38:11:10…	chr11	-	100694884	100704271	GO:0009615 // GO:0032480 // GO:0032480 // GO:0032481 // GO:0039534 // GO:0039536 // GO:0039536 // GO:0045087 // GO:0045088 // GO:0045824 // GO:0045824 // GO:0051607 // GO:1900245 // GO:1900246 // GO:0039534 // GO:0039534 // GO:0045088 // GO:0009615 // GO:0032480 // GO:0032480 // GO:0032481 // GO:0039534 // GO:0039536 // GO:0039536 // GO:0045087 // GO:0045088 // GO:0045824 // GO:0045824 // GO:0051…	response to virus // negative regulation of type I interferon production // negative regulation of type I interferon production // positive regulation of type I interferon production // negative regulation of MDA-5 signaling pathway // negative regulation of RIG-I signaling pathway // negative regulation of RIG-I signaling pathway // innate immune response // regulation of innate immune response …	inferred from mutant phenotype // inferred from mutant phenotype // not recorded // inferred from mutant phenotype // not recorded // inferred from mutant phenotype // not recorded // inferred from electronic annotation // not recorded // inferred from mutant phenotype // not recorded // inferred from electronic annotation // inferred from mutant phenotype // inferred from mutant phenotype // inf…	GO:0005737 // GO:0005737 // GO:0005737 // GO:0005737 // GO:0005737 // GO:0005737 // GO:0005737 // GO:0005737 // GO:0005737 // GO:0005737 // GO:0005737 // GO:0005737 // GO:0005737 // GO:0005737 // GO:0005737 // GO:0005737 // GO:0005737 // GO:0005737 // GO:0005737 // GO:0005737 // GO:0005737 // GO:0005737 // GO:0005737 // GO:0005737	cytoplasm // cytoplasm // cytoplasm // cytoplasm // cytoplasm // cytoplasm // cytoplasm // cytoplasm // cytoplasm // cytoplasm // cytoplasm // cytoplasm // cytoplasm // cytoplasm // cytoplasm // cytoplasm // cytoplasm // cytoplasm // cytoplasm // cytoplasm // cytoplasm // cytoplasm // cytoplasm // cytoplasm	inferred from direct assay // not recorded // inferred from electronic annotation // inferred from direct assay // not recorded // inferred from electronic annotation // inferred from direct assay // not recorded // inferred from electronic annotation // inferred from direct assay // not recorded // inferred from electronic annotation // inferred from direct assay // not recorded // inferred from…	GO:0000166 // GO:0003676 // GO:0003677 // GO:0003723 // GO:0003725 // GO:0003725 // GO:0003727 // GO:0004386 // GO:0005524 // GO:0008270 // GO:0016787 // GO:0016817 // GO:0046872 // GO:0003725 // GO:0003725 // GO:0003727 // GO:0003727 // GO:0008270 // GO:0008270 // GO:0000166 // GO:0003676 // GO:0003677 // GO:0003723 // GO:0003725 // GO:0003725 // GO:0003727 // GO:0004386 // GO:0005524 // GO:0008…	nucleotide binding // nucleic acid binding // DNA binding // RNA binding // double-stranded RNA binding // double-stranded RNA binding // single-stranded RNA binding // helicase activity // ATP binding // zinc ion binding // hydrolase activity // hydrolase activity, acting on acid anhydrides // metal ion binding // double-stranded RNA binding // double-stranded RNA binding // single-stranded RNA …	inferred from electronic annotation // inferred from electronic annotation // inferred from electronic annotation // inferred from electronic annotation // inferred from direct assay // not recorded // not recorded // inferred from electronic annotation // inferred from electronic annotation // not recorded // inferred from electronic annotation // inferred from electronic annotation // inferred …	---	---	Pfam // Pfam // Pfam // Pfam	IPR001650 // IPR006935 // IPR011545 // IPR021673	Helicase, C-terminal // Helicase/UvrB domain // DNA/RNA helicase, DEAD/DEAH box type, N-terminal // C-terminal domain of RIG-I	main	NONMMUT012024 475bp;			NONMMUT012023	8.73449	8.81866	8.63279	5.43564	5.53118	5.39978
TC1600001557.mm.1	Dtx3l	deltex 3-like (Drosophila) // deltex 3-like (Drosophila) // deltex 3-like (Drosophila) // deltex 3-like (Drosophila) // deltex 3-like (Drosophila) // deltex 3-like (Drosophila) // deltex 3-like (Drosophila) // --- // ---	Coding	< 1e-07	< 1e-07	946.1	98.73	9.58	up	NM_001013371 // ENSMUST00000081933 // ENSMUST00000114885 // uc007zbv.1 // uc007zbw.1 // BC085093 // BC137694 // OTTMUST00000057688 // OTTMUST00000057687	RefSeq // ENSEMBL // ENSEMBL // UCSC Genes // UCSC Genes // GenBank // GenBank // Havana transcript // Havana transcript	Mus musculus deltex 3-like (Drosophila) (Dtx3l), mRNA. // cdna:known chromosome:GRCm38:16:35926511:35939151:-1 gene:ENSMUSG00000049502 gene_biotype:protein_coding transcript_biotype:protein_coding // cdna:putative chromosome:GRCm38:16:35931861:35939151:-1 gene:ENSMUSG00000049502 gene_biotype:protein_coding transcript_biotype:protein_coding // deltex 3-like (Drosophila) // deltex 3-like (Drosophil…	chr16	-	35926511	35939151	GO:0006302 // GO:0006974 // GO:0010390 // GO:0016568 // GO:0006281 // GO:0006302 // GO:0006302 // GO:0006974 // GO:0006974 // GO:0010390 // GO:0010390 // GO:0016567 // GO:0006302 // GO:0006974 // GO:0010390 // GO:0016568 // GO:0006974 // GO:0006974 // GO:0010390 // GO:0010390 // GO:0006281 // GO:0006302 // GO:0006302 // GO:0016567 // GO:0006302 // GO:0006974 // GO:0010390 // GO:0016568 // GO:0006…	double-strand break repair // response to DNA damage stimulus // histone monoubiquitination // chromatin modification // DNA repair // double-strand break repair // double-strand break repair // response to DNA damage stimulus // response to DNA damage stimulus // histone monoubiquitination // histone monoubiquitination // protein ubiquitination // double-strand break repair // response to DNA da…	not recorded // not recorded // not recorded // inferred from electronic annotation // inferred from electronic annotation // inferred from electronic annotation // inferred from sequence or structural similarity // inferred from electronic annotation // inferred from sequence or structural similarity // inferred from electronic annotation // inferred from sequence or structural similarity // inf…	GO:0005634 // GO:0005737 // GO:0005634 // GO:0005634 // GO:0005737 // GO:0005737 // GO:0005634 // GO:0005737 // GO:0005634 // GO:0005634 // GO:0005737 // GO:0005737 // GO:0005634 // GO:0005737 // GO:0005634 // GO:0005737 // GO:0005634 // GO:0005737 // GO:0005634 // GO:0005737 // GO:0005634 // GO:0005634 // GO:0005737 // GO:0005737 // GO:0005634 // GO:0005737 // GO:0005634 // GO:0005634 // GO:0005…	nucleus // cytoplasm // nucleus // nucleus // cytoplasm // cytoplasm // nucleus // cytoplasm // nucleus // nucleus // cytoplasm // cytoplasm // nucleus // cytoplasm // nucleus // cytoplasm // nucleus // cytoplasm // nucleus // cytoplasm // nucleus // nucleus // cytoplasm // cytoplasm // nucleus // cytoplasm // nucleus // nucleus // cytoplasm // cytoplasm	not recorded // not recorded // inferred from electronic annotation // inferred from sequence or structural similarity // inferred from electronic annotation // inferred from sequence or structural similarity // not recorded // not recorded // inferred from sequence or structural similarity // inferred from electronic annotation // inferred from sequence or structural similarity // inferred from …	GO:0004842 // GO:0008270 // GO:0016874 // GO:0042393 // GO:0046872 // GO:0004842 // GO:0004842 // GO:0042393 // GO:0042393 // GO:0004842 // GO:0008270 // GO:0016874 // GO:0042393 // GO:0046872 // GO:0005515 // GO:0042393 // GO:0042393 // GO:0004842 // GO:0004842 // GO:0004842 // GO:0008270 // GO:0016874 // GO:0042393 // GO:0046872 // GO:0005515 // GO:0042393 // GO:0004842 // GO:0004842 // GO:0042…	ubiquitin-protein ligase activity // zinc ion binding // ligase activity // histone binding // metal ion binding // ubiquitin-protein ligase activity // ubiquitin-protein ligase activity // histone binding // histone binding // ubiquitin-protein ligase activity // zinc ion binding // ligase activity // histone binding // metal ion binding // protein binding // histone binding // histone binding /…	not recorded // inferred from electronic annotation // inferred from electronic annotation // not recorded // inferred from electronic annotation // inferred from electronic annotation // inferred from sequence or structural similarity // inferred from electronic annotation // inferred from sequence or structural similarity // not recorded // inferred from electronic annotation // inferred from e…	---	---	---	---	---	main				NONMMUT026436	10.021	9.95772	9.71104	6.67045	6.64155	6.6117
TC0600001369.mm.1	Usp18	ubiquitin specific peptidase 18 // ubiquitin specific peptidase 18 // ubiquitin specific peptidase 18 // ubiquitin specific peptidase 18	Coding	< 1e-07	< 1e-07	2256.22	237.22	9.51	up	NM_011909 // ENSMUST00000032198 // uc009dog.2 // BC138562	RefSeq // ENSEMBL // UCSC Genes // GenBank	Mus musculus ubiquitin specific peptidase 18 (Usp18), mRNA. // cdna:known chromosome:GRCm38:6:121245906:121270916:1 gene:ENSMUSG00000030107 gene_biotype:protein_coding transcript_biotype:protein_coding // ubiquitin specific peptidase 18 // Mus musculus ubiquitin specific peptidase 18, mRNA (cDNA clone MGC:170187 IMAGE:8861582), complete cds.	chr6	+	121245906	121270917	GO:0006508 // GO:0006511 // GO:0032020 // GO:0035634 // GO:0006508 // GO:0006511 // GO:0032020 // GO:0035634 // GO:0006508 // GO:0006511 // GO:0032020 // GO:0035634	proteolysis // ubiquitin-dependent protein catabolic process // ISG15-protein conjugation // response to stilbenoid // proteolysis // ubiquitin-dependent protein catabolic process // ISG15-protein conjugation // response to stilbenoid // proteolysis // ubiquitin-dependent protein catabolic process // ISG15-protein conjugation // response to stilbenoid	inferred from electronic annotation // inferred from electronic annotation // inferred from mutant phenotype // inferred from expression pattern // inferred from electronic annotation // inferred from electronic annotation // inferred from mutant phenotype // inferred from expression pattern // inferred from electronic annotation // inferred from electronic annotation // inferred from mutant phen…	GO:0005634 // GO:0005634 // GO:0005634	nucleus // nucleus // nucleus	not recorded // not recorded // not recorded	GO:0004221 // GO:0008233 // GO:0008234 // GO:0016787 // GO:0019785 // GO:0004221 // GO:0008233 // GO:0008234 // GO:0016787 // GO:0019785 // GO:0004221 // GO:0008233 // GO:0008234 // GO:0016787 // GO:0019785	ubiquitin thiolesterase activity // peptidase activity // cysteine-type peptidase activity // hydrolase activity // ISG15-specific protease activity // ubiquitin thiolesterase activity // peptidase activity // cysteine-type peptidase activity // hydrolase activity // ISG15-specific protease activity // ubiquitin thiolesterase activity // peptidase activity // cysteine-type peptidase activity // h…	inferred from electronic annotation // inferred from electronic annotation // inferred from electronic annotation // inferred from electronic annotation // inferred from mutant phenotype // inferred from electronic annotation // inferred from electronic annotation // inferred from electronic annotation // inferred from electronic annotation // inferred from mutant phenotype // inferred from elect…	---	---	Pfam	IPR001394	Peptidase C19, ubiquitin carboxyl-terminal hydrolase 2	main				XR_105022	11.1984	11.1975	11.0554	8.04003	7.86208	7.81567
TC0200003512.mm.1	Rnd3	Rho family GTPase 3 // Rho family GTPase 3 // Rho family GTPase 3 // Rho family GTPase 3 // Rho family GTPase 3 // Rho family GTPase 3 // Rho family GTPase 3 // --- // --- // ---	Coding	< 1e-07	< 1e-07	1375.03	146.12	9.41	up	NM_028810 // ENSMUST00000017288 // ENSMUST00000154545 // ENSMUST00000140864 // uc008jqf.1 // uc008jqg.1 // BC009002 // OTTMUST00000029556 // OTTMUST00000029557 // OTTMUST00000029558	RefSeq // ENSEMBL // ENSEMBL // ENSEMBL // UCSC Genes // UCSC Genes // GenBank // Havana transcript // Havana transcript // Havana transcript	Mus musculus Rho family GTPase 3 (Rnd3), mRNA. // cdna:known chromosome:GRCm38:2:51130438:51149111:-1 gene:ENSMUSG00000017144 gene_biotype:protein_coding transcript_biotype:protein_coding // cdna:putative chromosome:GRCm38:2:51131835:51149110:-1 gene:ENSMUSG00000017144 gene_biotype:protein_coding transcript_biotype:protein_coding // cdna:known chromosome:GRCm38:2:51137069:51149094:-1 gene:ENSMUSG…	chr2	-	51130438	51149111	GO:0007264 // GO:0007264 // GO:0007165 // GO:0006184 // GO:0015031 // GO:0007264 // GO:0007165 // GO:0006184 // GO:0015031 // GO:0007264 // GO:0007264	small GTPase mediated signal transduction // small GTPase mediated signal transduction // signal transduction // GTP catabolic process // protein transport // small GTPase mediated signal transduction // signal transduction // GTP catabolic process // protein transport // small GTPase mediated signal transduction // small GTPase mediated signal transduction	inferred from electronic annotation // inferred from electronic annotation // inferred from electronic annotation // inferred from electronic annotation // inferred from electronic annotation // inferred from electronic annotation // inferred from electronic annotation // inferred from electronic annotation // inferred from electronic annotation // inferred from electronic annotation // inferred …	GO:0005622 // GO:0005794 // GO:0016020 // GO:0000139 // GO:0005622 // GO:0005794 // GO:0016020 // GO:0000139 // GO:0005622 // GO:0005794 // GO:0016020 // GO:0000139 // GO:0005622 // GO:0005794 // GO:0016020 // GO:0000139 // GO:0005622 // GO:0005794 // GO:0016020 // GO:0000139	intracellular // Golgi apparatus // membrane // Golgi membrane // intracellular // Golgi apparatus // membrane // Golgi membrane // intracellular // Golgi apparatus // membrane // Golgi membrane // intracellular // Golgi apparatus // membrane // Golgi membrane // intracellular // Golgi apparatus // membrane // Golgi membrane	inferred from electronic annotation // inferred from electronic annotation // inferred from electronic annotation // inferred from electronic annotation // inferred from electronic annotation // inferred from electronic annotation // inferred from electronic annotation // inferred from electronic annotation // inferred from electronic annotation // inferred from electronic annotation // inferred …	GO:0000166 // GO:0005525 // GO:0005515 // GO:0000166 // GO:0005525 // GO:0003924 // GO:0005515 // GO:0000166 // GO:0005525 // GO:0003924 // GO:0005515 // GO:0000166 // GO:0005525 // GO:0005515 // GO:0000166 // GO:0005525 // GO:0005515	nucleotide binding // GTP binding // protein binding // nucleotide binding // GTP binding // GTPase activity // protein binding // nucleotide binding // GTP binding // GTPase activity // protein binding // nucleotide binding // GTP binding // protein binding // nucleotide binding // GTP binding // protein binding	inferred from electronic annotation // inferred from electronic annotation // inferred from physical interaction // inferred from electronic annotation // inferred from electronic annotation // inferred from electronic annotation // inferred from physical interaction // inferred from electronic annotation // inferred from electronic annotation // inferred from electronic annotation // inferred fr…	---	---	Pfam // Pfam // Pfam // Pfam // Pfam // Pfam	IPR001806 // IPR006689 // IPR013684 // IPR001806 // IPR006689 // IPR013684	Small GTPase superfamily // Small GTPase superfamily, ARF/SAR type // Mitochondrial Rho-like // Small GTPase superfamily // Small GTPase superfamily, ARF/SAR type // Mitochondrial Rho-like	main	NONMMUT037234 9959bp;	NONMMUT037233			10.6538	10.5132	10.141	7.28813	7.11215	7.22028
TC0800002905.mm.1	Hp	haptoglobin // haptoglobin // haptoglobin // haptoglobin	Coding	< 1e-07	< 1e-07	562.65	60.04	9.37	up	NM_017370 // ENSMUST00000074898 // uc009nin.2 // BC138872	RefSeq // ENSEMBL // UCSC Genes // GenBank	Mus musculus haptoglobin (Hp), mRNA. // cdna:known chromosome:GRCm38:8:109575130:109579172:-1 gene:ENSMUSG00000031722 gene_biotype:protein_coding transcript_biotype:protein_coding // haptoglobin // Mus musculus haptoglobin, mRNA (cDNA clone MGC:170499 IMAGE:8861894), complete cds.	chr8	-	109575128	109579172	GO:0001889 // GO:0006508 // GO:0006953 // GO:0010942 // GO:0042542 // GO:0042742 // GO:0051354 // GO:2000296 // GO:0008152 // GO:0001889 // GO:0006508 // GO:0006953 // GO:0010942 // GO:0042542 // GO:0042742 // GO:0051354 // GO:2000296 // GO:0001666 // GO:0001889 // GO:0002526 // GO:0006950 // GO:0007283 // GO:0042493 // GO:0009408 // GO:0009725 // GO:0010033 // GO:0010165 // GO:0010288 // GO:0014…	liver development // proteolysis // acute-phase response // positive regulation of cell death // response to hydrogen peroxide // defense response to bacterium // negative regulation of oxidoreductase activity // negative regulation of hydrogen peroxide catabolic process // metabolic process // liver development // proteolysis // acute-phase response // positive regulation of cell death // respon…	not recorded // inferred from electronic annotation // inferred from electronic annotation // not recorded // not recorded // inferred from electronic annotation // not recorded // not recorded // inferred from electronic annotation // not recorded // inferred from electronic annotation // inferred from electronic annotation // not recorded // not recorded // inferred from electronic annotation /…	GO:0005576 // GO:0005615 // GO:0005783 // GO:0005794 // GO:0031838 // GO:0005576 // GO:0005615 // GO:0005783 // GO:0005794 // GO:0031838 // GO:0005783 // GO:0005615 // GO:0005794 // GO:0005576 // GO:0005615 // GO:0005783 // GO:0005794 // GO:0031838	extracellular region // extracellular space // endoplasmic reticulum // Golgi apparatus // haptoglobin-hemoglobin complex // extracellular region // extracellular space // endoplasmic reticulum // Golgi apparatus // haptoglobin-hemoglobin complex // endoplasmic reticulum // extracellular space // Golgi apparatus // extracellular region // extracellular space // endoplasmic reticulum // Golgi appa…	inferred from electronic annotation // not recorded // not recorded // not recorded // not recorded // inferred from electronic annotation // not recorded // not recorded // not recorded // not recorded // inferred from electronic annotation // inferred from electronic annotation // inferred from electronic annotation // inferred from electronic annotation // not recorded // not recorded // not r…	GO:0003824 // GO:0004252 // GO:0016209 // GO:0030492 // GO:0042803 // GO:0030492 // GO:0003824 // GO:0004252 // GO:0016209 // GO:0030492 // GO:0042803 // GO:0030492 // GO:0042803 // GO:0003824 // GO:0004252 // GO:0016209 // GO:0030492 // GO:0042803 // GO:0030492	catalytic activity // serine-type endopeptidase activity // antioxidant activity // hemoglobin binding // protein homodimerization activity // hemoglobin binding // catalytic activity // serine-type endopeptidase activity // antioxidant activity // hemoglobin binding // protein homodimerization activity // hemoglobin binding // protein homodimerization activity // catalytic activity // serine-typ…	inferred from electronic annotation // inferred from electronic annotation // inferred from electronic annotation // not recorded // not recorded // inferred from electronic annotation // inferred from electronic annotation // inferred from electronic annotation // inferred from electronic annotation // not recorded // not recorded // inferred from electronic annotation // inferred from electroni…	---	---	Pfam	IPR001254	Peptidase S1	main	NONMMUT067128 4622bp;				9.13838	9.22508	9.077	5.82255	5.94897	5.99934
TC0100000375.mm.1	Stat1	signal transducer and activator of transcription 1 // signal transducer and activator of transcription 1 // signal transducer and activator of transcription 1 // signal transducer and activator of transcription 1 // signal transducer and activator of transcription 1 (Stat1), transcript variant 2, mRNA. // signal transducer and activator of transcription 1 (Stat1), transcript variant 2, mRNA. // s…	Coding	< 1e-07	< 1e-07	3416.54	367.67	9.29	up	NM_009283 // NM_001205314 // NM_001205313 // ENSMUST00000070968 // uc007axy.1 // uc007axz.1 // uc007aya.2 // uc007ayb.2 // uc007ayc.2 // uc007ayd.2 // BC004808	RefSeq // RefSeq // RefSeq // ENSEMBL // UCSC Genes // UCSC Genes // UCSC Genes // UCSC Genes // UCSC Genes // UCSC Genes // GenBank	Mus musculus signal transducer and activator of transcription 1 (Stat1), transcript variant 2, mRNA. // Mus musculus signal transducer and activator of transcription 1 (Stat1), transcript variant 3, mRNA. // Mus musculus signal transducer and activator of transcription 1 (Stat1), transcript variant 1, mRNA. // cdna:known chromosome:GRCm38:1:52119438:52161865:1 gene:ENSMUSG00000026104 gene_biotype…	chr1	+	52119438	52161865	GO:0001937 // GO:0006351 // GO:0006355 // GO:0006917 // GO:0006919 // GO:0007165 // GO:0007259 // GO:0007584 // GO:0008015 // GO:0008284 // GO:0009612 // GO:0009617 // GO:0016525 // GO:0019221 // GO:0031663 // GO:0032496 // GO:0032869 // GO:0033209 // GO:0034097 // GO:0035458 // GO:0042493 // GO:0043124 // GO:0043330 // GO:0043434 // GO:0045893 // GO:0045944 // GO:0048661 // GO:0051591 // GO:0060…	negative regulation of endothelial cell proliferation // transcription, DNA-dependent // regulation of transcription, DNA-dependent // induction of apoptosis // activation of cysteine-type endopeptidase activity involved in apoptotic process // signal transduction // JAK-STAT cascade // response to nutrient // blood circulation // positive regulation of cell proliferation // response to mechanica…	not recorded // inferred from mutant phenotype // inferred from mutant phenotype // not recorded // inferred from mutant phenotype // inferred from electronic annotation // not recorded // not recorded // not recorded // not recorded // not recorded // inferred from direct assay // not recorded // inferred from direct assay // inferred from direct assay // inferred from direct assay // not record…	GO:0000790 // GO:0005634 // GO:0005634 // GO:0005737 // GO:0005737 // GO:0030424 // GO:0030425 // GO:0005634 // GO:0005737 // GO:0005829 // GO:0030424 // GO:0030425 // GO:0000790 // GO:0005730 // GO:0000790 // GO:0005634 // GO:0005634 // GO:0005737 // GO:0005737 // GO:0030424 // GO:0030425 // GO:0005634 // GO:0005737 // GO:0005829 // GO:0030424 // GO:0030425 // GO:0000790 // GO:0005730 // GO:0000…	nuclear chromatin // nucleus // nucleus // cytoplasm // cytoplasm // axon // dendrite // nucleus // cytoplasm // cytosol // axon // dendrite // nuclear chromatin // nucleolus // nuclear chromatin // nucleus // nucleus // cytoplasm // cytoplasm // axon // dendrite // nucleus // cytoplasm // cytosol // axon // dendrite // nuclear chromatin // nucleolus // nuclear chromatin // nucleus // nucleus // …	not recorded // inferred from direct assay // not recorded // inferred from direct assay // not recorded // not recorded // not recorded // inferred from electronic annotation // inferred from electronic annotation // traceable author statement // inferred from sequence or structural similarity // inferred from sequence or structural similarity // inferred from electronic annotation // inferred f…	GO:0000978 // GO:0000979 // GO:0000983 // GO:0003677 // GO:0003690 // GO:0003700 // GO:0004871 // GO:0005164 // GO:0005509 // GO:0005515 // GO:0019899 // GO:0031730 // GO:0042803 // GO:0043565 // GO:0003677 // GO:0003700 // GO:0000978 // GO:0000979 // GO:0000983 // GO:0003690 // GO:0005164 // GO:0019899 // GO:0042803 // GO:0000978 // GO:0000979 // GO:0000983 // GO:0003677 // GO:0003690 // GO:0003…	RNA polymerase II core promoter proximal region sequence-specific DNA binding // RNA polymerase II core promoter sequence-specific DNA binding // RNA polymerase II core promoter sequence-specific DNA binding transcription factor activity // DNA binding // double-stranded DNA binding // sequence-specific DNA binding transcription factor activity // signal transducer activity // tumor necrosis fact…	not recorded // not recorded // not recorded // not recorded // not recorded // inferred from mutant phenotype // inferred from electronic annotation // not recorded // inferred from electronic annotation // inferred from physical interaction // not recorded // not recorded // not recorded // not recorded // inferred from electronic annotation // inferred from electronic annotation // inferred fr…	GenMAPP // GenMAPP // GenMAPP // GenMAPP // GenMAPP	TGF_Beta_Signaling_Pathway // TGF_Beta_Signaling_Pathway // TGF_Beta_Signaling_Pathway // TGF_Beta_Signaling_Pathway // TGF_Beta_Signaling_Pathway	Pfam // Pfam // Pfam // Pfam // Pfam	IPR000980 // IPR013799 // IPR013800 // IPR013801 // IPR022752	SH2 domain // STAT transcription factor, protein interaction // STAT transcription factor, all-alpha // STAT transcription factor, DNA-binding // Signal transducer and activation of transcription 1, TAZ2 binding domain, C-terminal	main					11.7998	11.766	11.6814	8.57852	8.51353	8.52234
TC0700004002.mm.1	Gvin1	GTPase, very large interferon inducible 1 // GTPase, very large interferon inducible 1 // GTPase, very large interferon inducible 1 // GTPase, very large interferon inducible 1 // GTPase, very large interferon inducible 1 // GTPase, very large interferon inducible 1 // GTPase, very large interferon inducible 1 // GTPase, very large interferon inducible 1	Coding	< 1e-07	< 1e-07	145.47	15.67	9.28	up	NM_001039160 // NM_029000 // NM_001243039_2 // NM_001243040_2 // NM_029000_2 // ENSMUST00000006667 // ENSMUST00000183409 // uc009izp.1 // uc009izq.1 // BC172717_2 // OTTMUST00000117432 // OTTMUST00000117424	RefSeq // RefSeq // RefSeq // RefSeq // RefSeq // ENSEMBL // ENSEMBL // UCSC Genes // UCSC Genes // GenBank // Havana transcript // Havana transcript	Mus musculus GTPase, very large interferon inducible 1 (Gvin1), transcript variant 2, mRNA. // Mus musculus GTPase, very large interferon inducible 1 (Gvin1), transcript variant 1, mRNA. // predicted gene 4070 // predicted gene 4070 // GTPase, very large interferon inducible 1 // cdna:known chromosome:GRCm38:7:106156535:106215340:-1 gene:ENSMUSG00000045868 gene_biotype:protein_coding transcript_b…	chr7	-	106156535	106215340	---	---	---	GO:0005634 // GO:0005737 // GO:0005829 // GO:0005634 // GO:0005737 // GO:0005829 // GO:0005634 // GO:0005737 // GO:0005829	nucleus // cytoplasm // cytosol // nucleus // cytoplasm // cytosol // nucleus // cytoplasm // cytosol	inferred from electronic annotation // inferred from electronic annotation // inferred from electronic annotation // inferred from electronic annotation // inferred from electronic annotation // inferred from electronic annotation // inferred from electronic annotation // inferred from electronic annotation // inferred from electronic annotation	GO:0000166 // GO:0005525 // GO:0000166 // GO:0005525 // GO:0003824 // GO:0000166 // GO:0005525	nucleotide binding // GTP binding // nucleotide binding // GTP binding // catalytic activity // nucleotide binding // GTP binding	inferred from electronic annotation // inferred from electronic annotation // inferred from electronic annotation // inferred from electronic annotation // inferred from electronic annotation // inferred from electronic annotation // inferred from electronic annotation	---	---	---	---	---	main		NR_040456_2 NONMMUT063121 NONMMUT063122	KnowTID_00006880 8253bp;		7.26435	7.42317	6.89839	3.89287	4.06736	3.99648
TC0700003862.mm.1	Trim21	tripartite motif-containing 21 // tripartite motif-containing 21 // tripartite motif-containing 21 // tripartite motif-containing 21 // tripartite motif-containing 21 // tripartite motif-containing 21 // tripartite motif-containing 21	Coding	< 1e-07	< 1e-07	264.13	28.56	9.25	up	NM_009277 // NM_001082552 // ENSMUST00000033264 // ENSMUST00000106913 // uc009irw.1 // uc009irx.1 // BC010580	RefSeq // RefSeq // ENSEMBL // ENSEMBL // UCSC Genes // UCSC Genes // GenBank	Mus musculus tripartite motif-containing 21 (Trim21), transcript variant 1, mRNA. // Mus musculus tripartite motif-containing 21 (Trim21), transcript variant 2, mRNA. // cdna:known chromosome:GRCm38:7:102557922:102565469:-1 gene:ENSMUSG00000030966 gene_biotype:protein_coding transcript_biotype:protein_coding // cdna:known chromosome:GRCm38:7:102557922:102565469:-1 gene:ENSMUSG00000030966 gene_bio…	chr7	-	102557920	102565482	GO:0000209 // GO:0006513 // GO:0007049 // GO:0016567 // GO:0031648 // GO:0032088 // GO:0045787 // GO:0051865 // GO:0070206 // GO:0090086 // GO:0000209 // GO:0006513 // GO:0016567 // GO:0016567 // GO:0031648 // GO:0032088 // GO:0045787 // GO:0051865 // GO:0090086 // GO:0000209 // GO:0006513 // GO:0031648 // GO:0032088 // GO:0045787 // GO:0051865 // GO:0070206 // GO:0090086 // GO:0000209 // GO:0006…	protein polyubiquitination // protein monoubiquitination // cell cycle // protein ubiquitination // protein destabilization // negative regulation of NF-kappaB transcription factor activity // positive regulation of cell cycle // protein autoubiquitination // protein trimerization // negative regulation of protein deubiquitination // protein polyubiquitination // protein monoubiquitination // pro…	not recorded // not recorded // inferred from electronic annotation // not recorded // not recorded // not recorded // not recorded // not recorded // not recorded // not recorded // inferred from sequence or structural similarity // inferred from sequence or structural similarity // inferred from electronic annotation // inferred from sequence or structural similarity // inferred from sequence o…	GO:0005622 // GO:0005634 // GO:0005737 // GO:0005737 // GO:0019005 // GO:0030529 // GO:0000932 // GO:0005634 // GO:0005634 // GO:0005737 // GO:0005737 // GO:0019005 // GO:0019005 // GO:0005622 // GO:0005634 // GO:0005737 // GO:0005737 // GO:0019005 // GO:0030529 // GO:0000932 // GO:0005634 // GO:0005634 // GO:0005737 // GO:0005737 // GO:0019005 // GO:0019005 // GO:0005622 // GO:0005634 // GO:0005…	intracellular // nucleus // cytoplasm // cytoplasm // SCF ubiquitin ligase complex // ribonucleoprotein complex // cytoplasmic mRNA processing body // nucleus // nucleus // cytoplasm // cytoplasm // SCF ubiquitin ligase complex // SCF ubiquitin ligase complex // intracellular // nucleus // cytoplasm // cytoplasm // SCF ubiquitin ligase complex // ribonucleoprotein complex // cytoplasmic mRNA proc…	inferred from electronic annotation // not recorded // inferred from direct assay // not recorded // not recorded // inferred from electronic annotation // inferred from electronic annotation // inferred from electronic annotation // inferred from sequence or structural similarity // inferred from electronic annotation // inferred from sequence or structural similarity // inferred from sequence o…	GO:0003677 // GO:0003723 // GO:0004842 // GO:0008270 // GO:0016874 // GO:0046872 // GO:0004842 // GO:0005515 // GO:0004842 // GO:0003677 // GO:0003723 // GO:0004842 // GO:0008270 // GO:0016874 // GO:0046872 // GO:0004842 // GO:0005515 // GO:0004842 // GO:0003677 // GO:0003723 // GO:0004842 // GO:0008270 // GO:0016874 // GO:0046872 // GO:0005515 // GO:0004842 // GO:0004842 // GO:0005515 // GO:0003…	DNA binding // RNA binding // ubiquitin-protein ligase activity // zinc ion binding // ligase activity // metal ion binding // ubiquitin-protein ligase activity // protein binding // ubiquitin-protein ligase activity // DNA binding // RNA binding // ubiquitin-protein ligase activity // zinc ion binding // ligase activity // metal ion binding // ubiquitin-protein ligase activity // protein binding…	inferred from electronic annotation // inferred from electronic annotation // not recorded // inferred from electronic annotation // inferred from electronic annotation // inferred from electronic annotation // inferred from sequence or structural similarity // inferred from physical interaction // inferred from electronic annotation // inferred from electronic annotation // inferred from electro…	GenMAPP // GenMAPP // GenMAPP // GenMAPP // GenMAPP	mRNA_processing_binding_Reactome // mRNA_processing_binding_Reactome // mRNA_processing_binding_Reactome // mRNA_processing_binding_Reactome // mRNA_processing_binding_Reactome	Pfam // Pfam // Pfam // Pfam // Pfam // Pfam	IPR000315 // IPR003877 // IPR018957 // IPR000315 // IPR003877 // IPR018957	Zinc finger, B-box // SPla/RYanodine receptor SPRY // Zinc finger, C3HC4 RING-type // Zinc finger, B-box // SPla/RYanodine receptor SPRY // Zinc finger, C3HC4 RING-type	main					8.11149	8.05418	8.00192	4.91348	4.906	4.73521
TC1500001728.mm.1	Ly6a	lymphocyte antigen 6 complex, locus A // lymphocyte antigen 6 complex, locus A // lymphocyte antigen 6 complex, locus A // lymphocyte antigen 6 complex, locus A // lymphocyte antigen 6 complex, locus A // lymphocyte antigen 6 complex, locus A // lymphocyte antigen 6 complex, locus A // lymphocyte antigen 6 complex, locus A // lymphocyte antigen 6 complex, locus A (Ly6a), mRNA. // lymphocyte antig…	Coding	< 1e-07	< 1e-07	134.27	15.12	8.88	up	NM_010738 // NM_001271446 // NM_001271418 // NM_001271419 // NM_001271417 // NM_001271416 // ENSMUST00000023248 // uc007wgk.1 // uc007wgl.1 // uc007wgm.1 // BC002070	RefSeq // RefSeq // RefSeq // RefSeq // RefSeq // RefSeq // ENSEMBL // UCSC Genes // UCSC Genes // UCSC Genes // GenBank	Mus musculus lymphocyte antigen 6 complex, locus A (Ly6a), transcript variant 3, mRNA. // Mus musculus lymphocyte antigen 6 complex, locus A (Ly6a), transcript variant 6, mRNA. // Mus musculus lymphocyte antigen 6 complex, locus A (Ly6a), transcript variant 4, mRNA. // Mus musculus lymphocyte antigen 6 complex, locus A (Ly6a), transcript variant 5, mRNA. // Mus musculus lymphocyte antigen 6 compl…	chr15	-	74994877	74998031	---	---	---	GO:0005622 // GO:0005886 // GO:0009897 // GO:0016020 // GO:0031225 // GO:0005622 // GO:0005886 // GO:0009897 // GO:0016020 // GO:0031225 // GO:0005622 // GO:0005886 // GO:0009897 // GO:0016020 // GO:0031225 // GO:0005622 // GO:0005886 // GO:0009897 // GO:0016020 // GO:0031225 // GO:0005622 // GO:0005886 // GO:0009897 // GO:0016020 // GO:0031225 // GO:0005622 // GO:0005886 // GO:0009897 // GO:0016…	intracellular // plasma membrane // external side of plasma membrane // membrane // anchored to membrane // intracellular // plasma membrane // external side of plasma membrane // membrane // anchored to membrane // intracellular // plasma membrane // external side of plasma membrane // membrane // anchored to membrane // intracellular // plasma membrane // external side of plasma membrane // mem…	inferred from direct assay // inferred from electronic annotation // inferred from direct assay // inferred from electronic annotation // inferred from electronic annotation // inferred from direct assay // inferred from electronic annotation // inferred from direct assay // inferred from electronic annotation // inferred from electronic annotation // inferred from direct assay // inferred from e…	---	---	---	---	---	Pfam	IPR001526	CD59 antigen	main					6.94212	7.3168	6.98018	4.10525	3.81594	3.88015
TC1700000622.mm.1	Psmb8	proteasome (prosome, macropain) subunit, beta type 8 (large multifunctional peptidase 7) // proteasome (prosome, macropain) subunit, beta type 8 (large multifunctional peptidase 7) // proteasome (prosome, macropain) subunit, beta type 8 (large multifunctional peptidase 7) // proteasome (prosome, macropain) subunit, beta type 8 (large multifunctional peptidase 7) // proteasome (prosome, macropain)…	Coding	< 1e-07	< 1e-07	352.17	40.15	8.77	up	NM_010724 // ENSMUST00000173441 // ENSMUST00000025196 // ENSMUST00000172960 // uc012apv.1 // BC013785 // BC051450 // OTTMUST00000095569 // OTTMUST00000095570 // OTTMUST00000095571	RefSeq // ENSEMBL // ENSEMBL // ENSEMBL // UCSC Genes // GenBank // GenBank // Havana transcript // Havana transcript // Havana transcript	Mus musculus proteasome (prosome, macropain) subunit, beta type 8 (large multifunctional peptidase 7) (Psmb8), mRNA. // cdna:putative chromosome:GRCm38:17:34197721:34200918:1 gene:ENSMUSG00000024338 gene_biotype:protein_coding transcript_biotype:protein_coding // cdna:known chromosome:GRCm38:17:34197790:34201454:1 gene:ENSMUSG00000024338 gene_biotype:protein_coding transcript_biotype:protein_codi…	chr17	+	34197721	34201454	GO:0006508 // GO:0019882 // GO:0030154 // GO:0045444 // GO:0045444 // GO:0051603 // GO:0045444 // GO:0006508 // GO:0019882 // GO:0030154 // GO:0045444 // GO:0045444 // GO:0051603 // GO:0045444 // GO:0006508 // GO:0019882 // GO:0030154 // GO:0045444 // GO:0045444 // GO:0051603 // GO:0045444 // GO:0006508 // GO:0019882 // GO:0030154 // GO:0045444 // GO:0045444 // GO:0051603 // GO:0045444 // GO:0006…	proteolysis // antigen processing and presentation // cell differentiation // fat cell differentiation // fat cell differentiation // proteolysis involved in cellular protein catabolic process // fat cell differentiation // proteolysis // antigen processing and presentation // cell differentiation // fat cell differentiation // fat cell differentiation // proteolysis involved in cellular protein …	inferred from electronic annotation // inferred from mutant phenotype // inferred from electronic annotation // inferred from mutant phenotype // not recorded // inferred from electronic annotation // inferred from electronic annotation // inferred from electronic annotation // inferred from mutant phenotype // inferred from electronic annotation // inferred from mutant phenotype // not recorded …	GO:0000502 // GO:0005634 // GO:0005737 // GO:0005839 // GO:0005829 // GO:0005839 // GO:0000502 // GO:0005634 // GO:0005737 // GO:0005839 // GO:0005839 // GO:0005829 // GO:0000502 // GO:0005634 // GO:0005737 // GO:0005839 // GO:0005829 // GO:0005839 // GO:0000502 // GO:0005634 // GO:0005737 // GO:0005839 // GO:0005829 // GO:0005839 // GO:0000502 // GO:0005634 // GO:0005737 // GO:0005839 // GO:0005…	proteasome complex // nucleus // cytoplasm // proteasome core complex // cytosol // proteasome core complex // proteasome complex // nucleus // cytoplasm // proteasome core complex // proteasome core complex // cytosol // proteasome complex // nucleus // cytoplasm // proteasome core complex // cytosol // proteasome core complex // proteasome complex // nucleus // cytoplasm // proteasome core comp…	inferred from electronic annotation // inferred from electronic annotation // inferred from electronic annotation // inferred from direct assay // traceable author statement // inferred from electronic annotation // inferred from electronic annotation // inferred from electronic annotation // inferred from electronic annotation // inferred from direct assay // inferred from electronic annotation …	GO:0004175 // GO:0004298 // GO:0008233 // GO:0016787 // GO:0004175 // GO:0004298 // GO:0008233 // GO:0016787 // GO:0004175 // GO:0004298 // GO:0008233 // GO:0016787 // GO:0004175 // GO:0004298 // GO:0008233 // GO:0016787 // GO:0004175 // GO:0004298 // GO:0008233 // GO:0016787 // GO:0004175 // GO:0004298 // GO:0008233 // GO:0016787	endopeptidase activity // threonine-type endopeptidase activity // peptidase activity // hydrolase activity // endopeptidase activity // threonine-type endopeptidase activity // peptidase activity // hydrolase activity // endopeptidase activity // threonine-type endopeptidase activity // peptidase activity // hydrolase activity // endopeptidase activity // threonine-type endopeptidase activity //…	inferred from electronic annotation // inferred from electronic annotation // inferred from electronic annotation // inferred from electronic annotation // inferred from electronic annotation // inferred from electronic annotation // inferred from electronic annotation // inferred from electronic annotation // inferred from electronic annotation // inferred from electronic annotation // inferred …	GenMAPP // GenMAPP // GenMAPP // GenMAPP // GenMAPP // GenMAPP	Proteasome_Degradation // Proteasome_Degradation // Proteasome_Degradation // Proteasome_Degradation // Proteasome_Degradation // Proteasome_Degradation	Pfam // Pfam	IPR001353 // IPR001353	Proteasome, subunit alpha/beta // Proteasome, subunit alpha/beta	main			NONMMUT029292 2073bp;	NONMMUT029290	8.37945	8.58147	8.45171	5.29864	5.39122	5.34002
TC1_GL456211_random00000030.mm.1	AC133103.3	N/A	Coding	< 1e-07	< 1e-07	614.38	70.42	8.72	up	ENSMUST00000178645	ENSEMBL	cdna:known scaffold:GRCm38:GL456211.1:226405:229375:-1 gene:ENSMUSG00000094514 gene_biotype:protein_coding transcript_biotype:protein_coding	chr1_GL456211_random	-	226405	229375	---	---	---	GO:0005634	nucleus	inferred from electronic annotation	---	---	---	---	---	Pfam	IPR004865	Sp100	main					9.46538	9.4073	8.94849	6.17964	6.00511	6.27649
TC0500000043.mm.1	Steap4	STEAP family member 4 // STEAP family member 4 // STEAP family member 4 // STEAP family member 4	Coding	< 1e-07	< 1e-07	241.63	27.96	8.64	up	NM_054098 // BC006651 // uc008wjg.1 // ENSMUST00000115421	RefSeq // GenBank // UCSC Genes // ENSEMBL	Mus musculus STEAP family member 4 (Steap4), mRNA. // Mus musculus STEAP family member 4, mRNA (cDNA clone MGC:7814 IMAGE:3500056), complete cds. // STEAP family member 4 // cdna:known chromosome:GRCm38:5:7960472:7982213:1 gene:ENSMUSG00000012428 gene_biotype:protein_coding transcript_biotype:protein_coding	chr5	+	7960472	7982213	GO:0006810 // GO:0006811 // GO:0055072 // GO:0055114 // GO:0045444 // GO:0006810 // GO:0006811 // GO:0055072 // GO:0055114 // GO:0045444 // GO:0006810 // GO:0006811 // GO:0055072 // GO:0055114 // GO:0045444	transport // ion transport // iron ion homeostasis // oxidation-reduction process // fat cell differentiation // transport // ion transport // iron ion homeostasis // oxidation-reduction process // fat cell differentiation // transport // ion transport // iron ion homeostasis // oxidation-reduction process // fat cell differentiation	inferred from electronic annotation // inferred from electronic annotation // inferred from electronic annotation // inferred from electronic annotation // inferred from expression pattern // inferred from electronic annotation // inferred from electronic annotation // inferred from electronic annotation // inferred from electronic annotation // inferred from expression pattern // inferred from e…	GO:0005794 // GO:0005886 // GO:0005887 // GO:0016020 // GO:0016021 // GO:0000139 // GO:0005886 // GO:0005794 // GO:0005886 // GO:0005887 // GO:0016020 // GO:0016021 // GO:0000139 // GO:0005886 // GO:0005794 // GO:0005886 // GO:0005887 // GO:0016020 // GO:0016021 // GO:0000139 // GO:0005886	Golgi apparatus // plasma membrane // integral to plasma membrane // membrane // integral to membrane // Golgi membrane // plasma membrane // Golgi apparatus // plasma membrane // integral to plasma membrane // membrane // integral to membrane // Golgi membrane // plasma membrane // Golgi apparatus // plasma membrane // integral to plasma membrane // membrane // integral to membrane // Golgi memb…	inferred from electronic annotation // inferred from direct assay // traceable author statement // inferred from electronic annotation // inferred from electronic annotation // inferred from electronic annotation // inferred from electronic annotation // inferred from electronic annotation // inferred from direct assay // traceable author statement // inferred from electronic annotation // inferr…	GO:0016491 // GO:0046872 // GO:0003674 // GO:0016491 // GO:0046872 // GO:0003674 // GO:0016491 // GO:0046872 // GO:0000166 // GO:0003674	oxidoreductase activity // metal ion binding // molecular_function // oxidoreductase activity // metal ion binding // molecular_function // oxidoreductase activity // metal ion binding // nucleotide binding // molecular_function	inferred from electronic annotation // inferred from electronic annotation // no biological data available // inferred from electronic annotation // inferred from electronic annotation // no biological data available // inferred from electronic annotation // inferred from electronic annotation // inferred from electronic annotation // no biological data available	---	---	Pfam // Pfam	IPR004455 // IPR013130	NADP oxidoreductase, coenzyme F420-dependent // Ferric reductase transmembrane component-like domain	main					7.99047	7.99518	7.79661	4.89749	4.63343	4.93278
TC1900000309.mm.1	Gna14	guanine nucleotide binding protein, alpha 14 // guanine nucleotide binding protein, alpha 14 // guanine nucleotide binding protein, alpha 14 // guanine nucleotide binding protein, alpha 14	Coding	< 1e-07	< 1e-07	250.64	29.82	8.41	up	NM_008137 // ENSMUST00000025602 // uc008gwu.2 // BC027015	RefSeq // ENSEMBL // UCSC Genes // GenBank	Mus musculus guanine nucleotide binding protein, alpha 14 (Gna14), mRNA. // cdna:known chromosome:GRCm38:19:16435667:16610818:1 gene:ENSMUSG00000024697 gene_biotype:protein_coding transcript_biotype:protein_coding // guanine nucleotide binding protein, alpha 14 // Mus musculus guanine nucleotide binding protein, alpha 14, mRNA (cDNA clone MGC:36137 IMAGE:5375817), complete cds.	chr19	+	16435667	16610818	GO:0006184 // GO:0007165 // GO:0007186 // GO:0007188 // GO:0060158 // GO:0006184 // GO:0007186 // GO:0007186 // GO:0007188 // GO:0060158 // GO:0006184 // GO:0007165 // GO:0007186 // GO:0007188 // GO:0060158 // GO:0006184 // GO:0006471 // GO:0007186 // GO:0007188 // GO:0060158 // GO:0006184 // GO:0007186 // GO:0006184 // GO:0007165 // GO:0007186 // GO:0007188 // GO:0060158 // GO:0006184 // GO:0007…	GTP catabolic process // signal transduction // G-protein coupled receptor signaling pathway // adenylate cyclase-modulating G-protein coupled receptor signaling pathway // phospholipase C-activating dopamine receptor signaling pathway // GTP catabolic process // G-protein coupled receptor signaling pathway // G-protein coupled receptor signaling pathway // adenylate cyclase-modulating G-protein …	not recorded // inferred from electronic annotation // not recorded // not recorded // not recorded // inferred from electronic annotation // inferred from electronic annotation // --- // --- // --- // not recorded // inferred from electronic annotation // not recorded // not recorded // not recorded // --- // inferred from electronic annotation // --- // --- // --- // inferred from electronic an…	GO:0005834 // GO:0031234 // GO:0005834 // GO:0031234 // GO:0005834 // GO:0031234 // GO:0005834 // GO:0031234 // GO:0005834 // GO:0031234 // GO:0005834 // GO:0031234	heterotrimeric G-protein complex // extrinsic to internal side of plasma membrane // heterotrimeric G-protein complex // extrinsic to internal side of plasma membrane // heterotrimeric G-protein complex // extrinsic to internal side of plasma membrane // heterotrimeric G-protein complex // extrinsic to internal side of plasma membrane // heterotrimeric G-protein complex // extrinsic to internal s…	not recorded // not recorded // --- // --- // not recorded // not recorded // --- // --- // not recorded // not recorded // --- // ---	GO:0000166 // GO:0001664 // GO:0003924 // GO:0004871 // GO:0005525 // GO:0019001 // GO:0031683 // GO:0046872 // GO:0001664 // GO:0001664 // GO:0003924 // GO:0003924 // GO:0004871 // GO:0004871 // GO:0031683 // GO:0031683 // GO:0000166 // GO:0001664 // GO:0003924 // GO:0004871 // GO:0005525 // GO:0019001 // GO:0031683 // GO:0046872 // GO:0003924 // GO:0001664 // GO:0004871 // GO:0031683 // GO:0001…	nucleotide binding // G-protein coupled receptor binding // GTPase activity // signal transducer activity // GTP binding // guanyl nucleotide binding // G-protein beta/gamma-subunit complex binding // metal ion binding // G-protein coupled receptor binding // G-protein coupled receptor binding // GTPase activity // GTPase activity // signal transducer activity // signal transducer activity // G-p…	inferred from electronic annotation // not recorded // not recorded // not recorded // inferred from electronic annotation // inferred from electronic annotation // not recorded // inferred from electronic annotation // --- // inferred from electronic annotation // --- // inferred from electronic annotation // --- // inferred from electronic annotation // --- // inferred from electronic annotatio…	GenMAPP // GenMAPP // GenMAPP	G_Protein_Signaling // G_Protein_Signaling // G_Protein_Signaling	Pfam // Pfam	IPR001019 // IPR006689	Guanine nucleotide binding protein (G-protein), alpha subunit // Small GTPase superfamily, ARF/SAR type	main		NONMMUT034035		NONMMUT034034 NONMMUT034036	8.14101	8.06808	7.73156	4.75821	5.05912	4.92427
TC1200001047.mm.1	Serpina3n	serine (or cysteine) peptidase inhibitor, clade A, member 3N // serine (or cysteine) peptidase inhibitor, clade A, member 3N // serine (or cysteine) peptidase inhibitor, clade A, member 3N // serine (or cysteine) peptidase inhibitor, clade A, member 3N // ---	Coding	< 1e-07	< 1e-07	1527.54	183.99	8.3	up	NM_009252 // ENSMUST00000021506 // uc007oxg.1 // BC013651 // OTTMUST00000039207	RefSeq // ENSEMBL // UCSC Genes // GenBank // Havana transcript	Mus musculus serine (or cysteine) peptidase inhibitor, clade A, member 3N (Serpina3n), mRNA. // cdna:known chromosome:GRCm38:12:104406729:104414329:1 gene:ENSMUSG00000021091 gene_biotype:protein_coding transcript_biotype:protein_coding // serine (or cysteine) peptidase inhibitor, clade A, member 3N // Mus musculus serine (or cysteine) peptidase inhibitor, clade A, member 3N, mRNA (cDNA clone MGC:…	chr12	+	104406708	104414329	GO:0006953 // GO:0010466 // GO:0010951 // GO:0030162 // GO:0034097 // GO:0043434 // GO:0010951 // GO:0030162 // GO:0006954 // GO:0032496 // GO:0034516 // GO:0071320 // GO:0071346 // GO:0071347 // GO:0071354 // GO:0071385 // GO:0006953 // GO:0010466 // GO:0010951 // GO:0030162 // GO:0034097 // GO:0043434 // GO:0006954 // GO:0010951 // GO:0030162 // GO:0032496 // GO:0034516 // GO:0071320 // GO:0071…	acute-phase response // negative regulation of peptidase activity // negative regulation of endopeptidase activity // regulation of proteolysis // response to cytokine stimulus // response to peptide hormone stimulus // negative regulation of endopeptidase activity // regulation of proteolysis // inflammatory response // response to lipopolysaccharide // response to vitamin B6 // cellular respons…	inferred from electronic annotation // inferred from electronic annotation // not recorded // not recorded // inferred from direct assay // inferred from direct assay // --- // --- // inferred from electronic annotation // inferred from electronic annotation // inferred from electronic annotation // inferred from electronic annotation // inferred from electronic annotation // inferred from electr…	GO:0005576 // GO:0005615 // GO:0005576 // GO:0005615 // GO:0005576 // GO:0005615 // GO:0005615 // GO:0005576 // GO:0005576 // GO:0005615 // GO:0005576 // GO:0005615	extracellular region // extracellular space // extracellular region // extracellular space // extracellular region // extracellular space // extracellular space // extracellular region // extracellular region // extracellular space // extracellular region // extracellular space	inferred from direct assay // not recorded // inferred from electronic annotation // inferred from electronic annotation // inferred from direct assay // not recorded // inferred from electronic annotation // inferred from electronic annotation // inferred from direct assay // not recorded // inferred from electronic annotation // inferred from electronic annotation	GO:0004867 // GO:0030414 // GO:0004867 // GO:0004867 // GO:0004867 // GO:0030414 // GO:0004867 // GO:0004867 // GO:0004867 // GO:0030414 // GO:0004867 // GO:0004867	serine-type endopeptidase inhibitor activity // peptidase inhibitor activity // serine-type endopeptidase inhibitor activity // serine-type endopeptidase inhibitor activity // serine-type endopeptidase inhibitor activity // peptidase inhibitor activity // serine-type endopeptidase inhibitor activity // serine-type endopeptidase inhibitor activity // serine-type endopeptidase inhibitor activity //…	not recorded // inferred from electronic annotation // --- // inferred from electronic annotation // not recorded // inferred from electronic annotation // --- // inferred from electronic annotation // not recorded // inferred from electronic annotation // --- // inferred from electronic annotation	---	---	Pfam	IPR023796	Serpin domain	main	NONMMUT015498 8568bp;				10.7163	10.5568	10.4901	7.5325	7.64311	7.44242
TC0600003139.mm.1	Tapbpl	TAP binding protein-like // TAP binding protein-like // TAP binding protein-like // TAP binding protein-like // ---	Coding	< 1e-07	< 1e-07	1166.26	144.18	8.09	up	NM_145391 // ENSMUST00000043422 // uc009dua.1 // BC017613 // OTTMUST00000088109	RefSeq // ENSEMBL // UCSC Genes // GenBank // Havana transcript	Mus musculus TAP binding protein-like (Tapbpl), mRNA. // cdna:known chromosome:GRCm38:6:125223933:125231860:-1 gene:ENSMUSG00000038213 gene_biotype:protein_coding transcript_biotype:protein_coding // TAP binding protein-like // Mus musculus TAP binding protein-like, mRNA (cDNA clone MGC:27679 IMAGE:4912570), complete cds. // TAP binding protein-like	chr6	-	125223933	125231860	GO:0008150 // GO:0019885 // GO:0008150 // GO:0019885 // GO:0008150 // GO:0019885	biological_process // antigen processing and presentation of endogenous peptide antigen via MHC class I // biological_process // antigen processing and presentation of endogenous peptide antigen via MHC class I // biological_process // antigen processing and presentation of endogenous peptide antigen via MHC class I	no biological data available // inferred from electronic annotation // no biological data available // inferred from electronic annotation // no biological data available // inferred from electronic annotation	GO:0005783 // GO:0005886 // GO:0016020 // GO:0016021 // GO:0043231 // GO:0005575 // GO:0005789 // GO:0031090 // GO:0005783 // GO:0005886 // GO:0016020 // GO:0016021 // GO:0043231 // GO:0005575 // GO:0005789 // GO:0031090 // GO:0005783 // GO:0005886 // GO:0016020 // GO:0016021 // GO:0043231 // GO:0005575 // GO:0005789 // GO:0031090	endoplasmic reticulum // plasma membrane // membrane // integral to membrane // intracellular membrane-bounded organelle // cellular_component // endoplasmic reticulum membrane // organelle membrane // endoplasmic reticulum // plasma membrane // membrane // integral to membrane // intracellular membrane-bounded organelle // cellular_component // endoplasmic reticulum membrane // organelle membran…	inferred from electronic annotation // inferred from electronic annotation // inferred from electronic annotation // inferred from electronic annotation // inferred from electronic annotation // no biological data available // inferred from electronic annotation // inferred from electronic annotation // inferred from electronic annotation // inferred from electronic annotation // inferred from el…	GO:0003674 // GO:0005515 // GO:0003674 // GO:0003674	molecular_function // protein binding // molecular_function // molecular_function	no biological data available // inferred from electronic annotation // no biological data available // no biological data available	---	---	Pfam // Pfam // Pfam	IPR003597 // IPR013106 // IPR013151	Immunoglobulin C1-set // Immunoglobulin V-set // Immunoglobulin	main	NONMMUT058854 762bp;		NONMMUT058848 1421bp;	NONMMUT058849 NONMMUT058851	10.2247	10.2752	10.0953	7.25329	7.19492	7.11463
TC1000003214.mm.1	Lilrb4	leukocyte immunoglobulin-like receptor, subfamily B, member 4 // leukocyte immunoglobulin-like receptor, subfamily B, member 4 // leukocyte immunoglobulin-like receptor, subfamily B, member 4 (Lilrb4), mRNA. // leukocyte immunoglobulin-like receptor, subfamily B, member 4 // leukocyte immunoglobulin-like receptor, subfamily B, member 4 // leukocyte immunoglobulin-like receptor, subfamily B, membe…	Coding	< 1e-07	< 1e-07	120.16	15.5	7.75	up	NM_013532 // ENSMUST00000078778 // uc007far.1 // uc011xdq.1 // uc007fas.1 // BC006591 // BC099532	RefSeq // ENSEMBL // UCSC Genes // UCSC Genes // UCSC Genes // GenBank // GenBank	Mus musculus leukocyte immunoglobulin-like receptor, subfamily B, member 4 (Lilrb4), mRNA. // cdna:known chromosome:GRCm38:10:51491018:51496613:1 gene:ENSMUSG00000062593 gene_biotype:protein_coding transcript_biotype:protein_coding // leukocyte immunoglobulin-like receptor, subfamily B, member 4 (Lilrb4), mRNA. // leukocyte immunoglobulin-like receptor, subfamily B, member 4 // leukocyte immunogl…	chr10	+	51490970	51496613	---	---	---	GO:0005886 // GO:0016020 // GO:0016021 // GO:0005886 // GO:0016020 // GO:0016021 // GO:0005886 // GO:0016020 // GO:0016021 // GO:0005886 // GO:0016020 // GO:0016021	plasma membrane // membrane // integral to membrane // plasma membrane // membrane // integral to membrane // plasma membrane // membrane // integral to membrane // plasma membrane // membrane // integral to membrane	inferred from electronic annotation // inferred from electronic annotation // inferred from electronic annotation // inferred from electronic annotation // inferred from electronic annotation // inferred from electronic annotation // inferred from electronic annotation // inferred from electronic annotation // inferred from electronic annotation // inferred from electronic annotation // inferred …	GO:0005515	protein binding	inferred from electronic annotation	---	---	---	---	---	main					6.86742	7.16135	6.72974	3.9055	4.03171	3.97183
TC0200001222.mm.1	Ube2l6	ubiquitin-conjugating enzyme E2L 6 // ubiquitin-conjugating enzyme E2L 6 // ubiquitin-conjugating enzyme E2L 6 // ubiquitin-conjugating enzyme E2L 6 // ubiquitin-conjugating enzyme E2L 6 // ubiquitin-conjugating enzyme E2L 6 // ubiquitin-conjugating enzyme E2L 6 // --- // --- // --- // ---	Coding	< 1e-07	< 1e-07	843.41	109.43	7.71	up	NM_019949 // ENSMUST00000102642 // ENSMUST00000150325 // ENSMUST00000154709 // ENSMUST00000159150 // uc012byn.1 // BC008238 // OTTMUST00000032887 // OTTMUST00000032888 // OTTMUST00000032889 // OTTMUST00000086949	RefSeq // ENSEMBL // ENSEMBL // ENSEMBL // ENSEMBL // UCSC Genes // GenBank // Havana transcript // Havana transcript // Havana transcript // Havana transcript	Mus musculus ubiquitin-conjugating enzyme E2L 6 (Ube2l6), mRNA. // cdna:known chromosome:GRCm38:2:84798828:84810176:1 gene:ENSMUSG00000027078 gene_biotype:protein_coding transcript_biotype:protein_coding // cdna:novel chromosome:GRCm38:2:84798834:84806391:1 gene:ENSMUSG00000027078 gene_biotype:protein_coding transcript_biotype:protein_coding // cdna:known chromosome:GRCm38:2:84802703:84810335:1 g…	chr2	+	84798828	84810335	GO:0019941 // GO:0032020 // GO:0016567 // GO:0019941 // GO:0032020 // GO:0016567 // GO:0019941 // GO:0032020 // GO:0016567 // GO:0019941 // GO:0032020 // GO:0016567 // GO:0019941 // GO:0032020 // GO:0016567 // GO:0019941 // GO:0032020 // GO:0016567	modification-dependent protein catabolic process // ISG15-protein conjugation // protein ubiquitination // modification-dependent protein catabolic process // ISG15-protein conjugation // protein ubiquitination // modification-dependent protein catabolic process // ISG15-protein conjugation // protein ubiquitination // modification-dependent protein catabolic process // ISG15-protein conjugation …	inferred from direct assay // inferred from direct assay // inferred from electronic annotation // inferred from direct assay // inferred from direct assay // inferred from electronic annotation // inferred from direct assay // inferred from direct assay // inferred from electronic annotation // inferred from direct assay // inferred from direct assay // inferred from electronic annotation // inf…	---	---	---	GO:0000166 // GO:0004842 // GO:0005515 // GO:0005524 // GO:0016874 // GO:0016881 // GO:0019787 // GO:0042296 // GO:0000166 // GO:0004842 // GO:0005515 // GO:0005524 // GO:0016874 // GO:0016881 // GO:0019787 // GO:0042296 // GO:0005515 // GO:0000166 // GO:0004842 // GO:0005515 // GO:0005524 // GO:0016874 // GO:0016881 // GO:0019787 // GO:0042296 // GO:0000166 // GO:0004842 // GO:0005515 // GO:0005…	nucleotide binding // ubiquitin-protein ligase activity // protein binding // ATP binding // ligase activity // acid-amino acid ligase activity // small conjugating protein ligase activity // ISG15 ligase activity // nucleotide binding // ubiquitin-protein ligase activity // protein binding // ATP binding // ligase activity // acid-amino acid ligase activity // small conjugating protein ligase ac…	inferred from electronic annotation // inferred from electronic annotation // inferred from physical interaction // inferred from electronic annotation // inferred from electronic annotation // inferred from electronic annotation // inferred from direct assay // inferred from direct assay // inferred from electronic annotation // inferred from electronic annotation // inferred from physical inter…	---	---	Pfam	IPR000608	Ubiquitin-conjugating enzyme, E2	main					9.75769	9.81171	9.62309	6.92594	6.73652	6.70655
TC0200004219.mm.1	Cd44	CD44 antigen // CD44 antigen // CD44 antigen // CD44 antigen // CD44 antigen // CD44 antigen // CD44 antigen // CD44 antigen // CD44 antigen // CD44 antigen // CD44 antigen // CD44 antigen // CD44 antigen // CD44 antigen // CD44 antigen // CD44 antigen // CD44 antigen // CD44 antigen // CD44 antigen // CD44 antigen // CD44 antigen // CD44 antigen (Cd44), transcript variant 3, mRNA. // CD44 antige…	Coding	< 1e-07	< 1e-07	320.68	41.83	7.67	up	NM_009851 // NM_001177787 // NM_001039151 // NM_001177786 // NM_001039150 // NM_001177785 // ENSMUST00000005218 // ENSMUST00000111194 // ENSMUST00000060516 // ENSMUST00000099673 // ENSMUST00000111190 // ENSMUST00000111191 // ENSMUST00000111198 // ENSMUST00000111192 // ENSMUST00000124624 // uc008lih.2 // uc008lig.2 // uc008lij.2 // uc008lif.2 // uc008lie.2 // uc008lii.2 // uc008lik.1 // BC051388 /…	RefSeq // RefSeq // RefSeq // RefSeq // RefSeq // RefSeq // ENSEMBL // ENSEMBL // ENSEMBL // ENSEMBL // ENSEMBL // ENSEMBL // ENSEMBL // ENSEMBL // ENSEMBL // UCSC Genes // UCSC Genes // UCSC Genes // UCSC Genes // UCSC Genes // UCSC Genes // UCSC Genes // GenBank // Havana transcript // Havana transcript // Havana transcript // Havana transcript // Havana transcript // Havana transcript // Havan…	Mus musculus CD44 antigen (Cd44), transcript variant 1, mRNA. // Mus musculus CD44 antigen (Cd44), transcript variant 6, mRNA. // Mus musculus CD44 antigen (Cd44), transcript variant 3, mRNA. // Mus musculus CD44 antigen (Cd44), transcript variant 5, mRNA. // Mus musculus CD44 antigen (Cd44), transcript variant 2, mRNA. // Mus musculus CD44 antigen (Cd44), transcript variant 4, mRNA. // cdna:know…	chr2	-	102811141	102901665	GO:0001558 // GO:0001658 // GO:0002246 // GO:0002821 // GO:0002906 // GO:0007155 // GO:0007155 // GO:0010628 // GO:0016055 // GO:0016477 // GO:0030214 // GO:0031175 // GO:0033031 // GO:0033138 // GO:0033138 // GO:0034116 // GO:0034238 // GO:0043066 // GO:0043066 // GO:0043154 // GO:0043518 // GO:0043518 // GO:0044344 // GO:0050731 // GO:0050731 // GO:0060442 // GO:0070374 // GO:0070374 // GO:0070…	regulation of cell growth // branching involved in ureteric bud morphogenesis // wound healing involved in inflammatory response // positive regulation of adaptive immune response // negative regulation of mature B cell apoptotic process // cell adhesion // cell adhesion // positive regulation of gene expression // Wnt receptor signaling pathway // cell migration // hyaluronan catabolic process /…	not recorded // inferred from mutant phenotype // inferred from mutant phenotype // non-traceable author statement // inferred from direct assay // inferred from direct assay // not recorded // inferred from genetic interaction // inferred from direct assay // not recorded // not recorded // not recorded // not recorded // inferred from mutant phenotype // not recorded // not recorded // not reco…	GO:0005634 // GO:0005886 // GO:0009897 // GO:0009986 // GO:0009986 // GO:0016020 // GO:0016021 // GO:0016323 // GO:0016323 // GO:0016324 // GO:0043234 // GO:0009986 // GO:0005634 // GO:0005886 // GO:0009897 // GO:0009986 // GO:0009986 // GO:0016020 // GO:0016021 // GO:0016323 // GO:0016323 // GO:0016324 // GO:0043234 // GO:0005634 // GO:0005886 // GO:0009897 // GO:0009986 // GO:0009986 // GO:0016…	nucleus // plasma membrane // external side of plasma membrane // cell surface // cell surface // membrane // integral to membrane // basolateral plasma membrane // basolateral plasma membrane // apical plasma membrane // protein complex // cell surface // nucleus // plasma membrane // external side of plasma membrane // cell surface // cell surface // membrane // integral to membrane // basolate…	not recorded // inferred from direct assay // inferred from direct assay // inferred from direct assay // not recorded // inferred from electronic annotation // inferred from electronic annotation // inferred from direct assay // not recorded // not recorded // not recorded // inferred from electronic annotation // not recorded // inferred from direct assay // inferred from direct assay // inferr…	GO:0004415 // GO:0004888 // GO:0004888 // GO:0005154 // GO:0005515 // GO:0005540 // GO:0005540 // GO:0005540 // GO:0019901 // GO:0019955 // GO:0051219 // GO:0005540 // GO:0004415 // GO:0004888 // GO:0004415 // GO:0004888 // GO:0004888 // GO:0005154 // GO:0005515 // GO:0005540 // GO:0005540 // GO:0005540 // GO:0019901 // GO:0019955 // GO:0051219 // GO:0005540 // GO:0004415 // GO:0004888 // GO:0004…	hyalurononglucosaminidase activity // transmembrane signaling receptor activity // transmembrane signaling receptor activity // epidermal growth factor receptor binding // protein binding // hyaluronic acid binding // hyaluronic acid binding // hyaluronic acid binding // protein kinase binding // cytokine binding // phosphoprotein binding // hyaluronic acid binding // hyalurononglucosaminidase ac…	not recorded // inferred from direct assay // not recorded // not recorded // inferred from physical interaction // inferred from direct assay // inferred from mutant phenotype // not recorded // not recorded // inferred from direct assay // not recorded // inferred from electronic annotation // inferred from electronic annotation // inferred from electronic annotation // not recorded // inferred…	---	---	Pfam // Pfam // Pfam // Pfam // Pfam // Pfam // Pfam // Pfam	IPR000538 // IPR000538 // IPR000538 // IPR000538 // IPR000538 // IPR000538 // IPR000538 // IPR000538	Link // Link // Link // Link // Link // Link // Link // Link	main				ENSMUST00000083749	8.42229	8.53657	8.04826	5.40517	5.40734	5.39499
TC1000001596.mm.1	Stat2	signal transducer and activator of transcription 2 // signal transducer and activator of transcription 2 // signal transducer and activator of transcription 2 // signal transducer and activator of transcription 2 // signal transducer and activator of transcription 2 (Stat2), mRNA. // signal transducer and activator of transcription 2 (Stat2), mRNA.	Coding	< 1e-07	< 1e-07	961.63	125.61	7.66	up	NM_019963 // ENSMUST00000105238 // ENSMUST00000085708 // uc007hma.1 // uc011xqd.1 // uc007hmb.1 // BC167243	RefSeq // ENSEMBL // ENSEMBL // UCSC Genes // UCSC Genes // UCSC Genes // GenBank	Mus musculus signal transducer and activator of transcription 2 (Stat2), mRNA. // cdna:known chromosome:GRCm38:10:128270576:128292849:1 gene:ENSMUSG00000040033 gene_biotype:protein_coding transcript_biotype:protein_coding // cdna:known chromosome:GRCm38:10:128270576:128292849:1 gene:ENSMUSG00000040033 gene_biotype:protein_coding transcript_biotype:protein_coding // signal transducer and activator…	chr10	+	128270576	128292849	GO:0006351 // GO:0006355 // GO:0007165 // GO:0006351 // GO:0006355 // GO:0007165 // GO:0006351 // GO:0006355 // GO:0007165	transcription, DNA-dependent // regulation of transcription, DNA-dependent // signal transduction // transcription, DNA-dependent // regulation of transcription, DNA-dependent // signal transduction // transcription, DNA-dependent // regulation of transcription, DNA-dependent // signal transduction	inferred from electronic annotation // inferred from electronic annotation // inferred from electronic annotation // inferred from electronic annotation // inferred from electronic annotation // inferred from electronic annotation // inferred from electronic annotation // inferred from electronic annotation // inferred from electronic annotation	GO:0005634 // GO:0005737 // GO:0005737 // GO:0005886 // GO:0005634 // GO:0005737 // GO:0005634 // GO:0005737 // GO:0005737 // GO:0005886 // GO:0005634 // GO:0005737 // GO:0005634 // GO:0005737 // GO:0005737 // GO:0005886 // GO:0005886 // GO:0005737 // GO:0005634	nucleus // cytoplasm // cytoplasm // plasma membrane // nucleus // cytoplasm // nucleus // cytoplasm // cytoplasm // plasma membrane // nucleus // cytoplasm // nucleus // cytoplasm // cytoplasm // plasma membrane // plasma membrane // cytoplasm // nucleus	inferred from direct assay // inferred from direct assay // not recorded // not recorded // inferred from electronic annotation // inferred from electronic annotation // inferred from direct assay // inferred from direct assay // not recorded // not recorded // inferred from electronic annotation // inferred from electronic annotation // inferred from direct assay // inferred from direct assay //…	GO:0003677 // GO:0003700 // GO:0004871 // GO:0005509 // GO:0005515 // GO:0003677 // GO:0003700 // GO:0004871 // GO:0005509 // GO:0005515 // GO:0005515 // GO:0003677 // GO:0003700 // GO:0004871 // GO:0005509 // GO:0005515 // GO:0005515	DNA binding // sequence-specific DNA binding transcription factor activity // signal transducer activity // calcium ion binding // protein binding // DNA binding // sequence-specific DNA binding transcription factor activity // signal transducer activity // calcium ion binding // protein binding // protein binding // DNA binding // sequence-specific DNA binding transcription factor activity // si…	inferred from electronic annotation // inferred from electronic annotation // inferred from electronic annotation // inferred from electronic annotation // inferred from physical interaction // inferred from electronic annotation // inferred from electronic annotation // inferred from electronic annotation // inferred from electronic annotation // inferred from physical interaction // inferred fr…	---	---	Pfam // Pfam // Pfam // Pfam // Pfam // Pfam // Pfam // Pfam // Pfam // Pfam	IPR000980 // IPR013799 // IPR013800 // IPR013801 // IPR022756 // IPR000980 // IPR013799 // IPR013800 // IPR013801 // IPR022756	SH2 domain // STAT transcription factor, protein interaction // STAT transcription factor, all-alpha // STAT transcription factor, DNA-binding // Signal transducer and activation of transcription 2, C-terminal // SH2 domain // STAT transcription factor, protein interaction // STAT transcription factor, all-alpha // STAT transcription factor, DNA-binding // Signal transducer and activation of tran…	main					9.97164	9.92175	9.86684	7.08929	6.92765	6.94896
TC0100001381.mm.1	Rgs16	regulator of G-protein signaling 16 // regulator of G-protein signaling 16 // regulator of G-protein signaling 16 // regulator of G-protein signaling 16 // regulator of G-protein signaling 16 // regulator of G-protein signaling 16 // ---	Coding	< 1e-07	< 1e-07	403.61	53.06	7.61	up	NM_011267 // ENSMUST00000027748 // uc007dae.2 // BC049968 // BC010980 // BC055459 // OTTMUST00000049392	RefSeq // ENSEMBL // UCSC Genes // GenBank // GenBank // GenBank // Havana transcript	Mus musculus regulator of G-protein signaling 16 (Rgs16), mRNA. // cdna:known chromosome:GRCm38:1:153740349:153745468:1 gene:ENSMUSG00000026475 gene_biotype:protein_coding transcript_biotype:protein_coding // regulator of G-protein signaling 16 // Mus musculus regulator of G-protein signaling 16, mRNA (cDNA clone MGC:59058 IMAGE:4021479), complete cds. // Mus musculus regulator of G-protein signa…	chr1	+	153740349	153745468	GO:0007186 // GO:0009968 // GO:0038032 // GO:0043547 // GO:0043547 // GO:0007186 // GO:0009968 // GO:0038032 // GO:0043547 // GO:0043547 // GO:0007186 // GO:0009968 // GO:0038032 // GO:0043547 // GO:0043547 // GO:0007186 // GO:0009968 // GO:0038032 // GO:0043547 // GO:0043547 // GO:0007186 // GO:0009968 // GO:0038032 // GO:0043547 // GO:0043547	G-protein coupled receptor signaling pathway // negative regulation of signal transduction // termination of G-protein coupled receptor signaling pathway // positive regulation of GTPase activity // positive regulation of GTPase activity // G-protein coupled receptor signaling pathway // negative regulation of signal transduction // termination of G-protein coupled receptor signaling pathway // p…	traceable author statement // inferred from electronic annotation // inferred from electronic annotation // --- // traceable author statement // traceable author statement // inferred from electronic annotation // inferred from electronic annotation // --- // traceable author statement // traceable author statement // inferred from electronic annotation // inferred from electronic annotation // -…	GO:0005737 // GO:0005737 // GO:0005886 // GO:0045121 // GO:0005737 // GO:0005886 // GO:0005737 // GO:0005737 // GO:0005886 // GO:0045121 // GO:0005886 // GO:0005737 // GO:0045121 // GO:0005737 // GO:0005737 // GO:0005886 // GO:0045121 // GO:0005737 // GO:0005886 // GO:0005737 // GO:0005737 // GO:0005886 // GO:0045121 // GO:0005737 // GO:0005886 // GO:0005737 // GO:0005737 // GO:0005886 // GO:0045…	cytoplasm // cytoplasm // plasma membrane // membrane raft // cytoplasm // plasma membrane // cytoplasm // cytoplasm // plasma membrane // membrane raft // plasma membrane // cytoplasm // membrane raft // cytoplasm // cytoplasm // plasma membrane // membrane raft // cytoplasm // plasma membrane // cytoplasm // cytoplasm // plasma membrane // membrane raft // cytoplasm // plasma membrane // cytopl…	not recorded // traceable author statement // not recorded // not recorded // --- // --- // not recorded // traceable author statement // not recorded // not recorded // --- // --- // inferred from electronic annotation // not recorded // traceable author statement // not recorded // not recorded // --- // --- // not recorded // traceable author statement // not recorded // not recorded // --- //…	GO:0005096 // GO:0005096 // GO:0005096 // GO:0005096 // GO:0005096 // GO:0005515 // GO:0005096 // GO:0005096 // GO:0005096 // GO:0005096 // GO:0005096 // GO:0005096 // GO:0005096 // GO:0005096 // GO:0005096 // GO:0005096	GTPase activator activity // GTPase activator activity // GTPase activator activity // GTPase activator activity // GTPase activator activity // protein binding // GTPase activator activity // GTPase activator activity // GTPase activator activity // GTPase activator activity // GTPase activator activity // GTPase activator activity // GTPase activator activity // GTPase activator activity // GTP…	not recorded // traceable author statement // --- // not recorded // traceable author statement // inferred from electronic annotation // --- // not recorded // traceable author statement // --- // not recorded // traceable author statement // --- // not recorded // traceable author statement // ---	GenMAPP // GenMAPP // GenMAPP // GenMAPP // GenMAPP // GenMAPP // GenMAPP // GenMAPP // GenMAPP // GenMAPP	Calcium_regulation_in_cardiac_cells // Smooth_muscle_contraction // Calcium_regulation_in_cardiac_cells // Smooth_muscle_contraction // Calcium_regulation_in_cardiac_cells // Smooth_muscle_contraction // Calcium_regulation_in_cardiac_cells // Smooth_muscle_contraction // Calcium_regulation_in_cardiac_cells // Smooth_muscle_contraction	Pfam	IPR000342	Regulator of G protein signalling	main					8.65898	8.66222	8.6815	5.93584	5.67645	5.62381
TC0X00000316.mm.1	Il13ra1	interleukin 13 receptor, alpha 1 // interleukin 13 receptor, alpha 1 // interleukin 13 receptor, alpha 1 // interleukin 13 receptor, alpha 1 // interleukin 13 receptor, alpha 1 // ---	Coding	< 1e-07	< 1e-07	374.05	49.3	7.59	up	NM_133990 // ENSMUST00000033418 // uc009sxj.1 // BC052425 // BC059939 // OTTMUST00000041683	RefSeq // ENSEMBL // UCSC Genes // GenBank // GenBank // Havana transcript	Mus musculus interleukin 13 receptor, alpha 1 (Il13ra1), mRNA. // cdna:known chromosome:GRCm38:X:36112110:36171259:1 gene:ENSMUSG00000017057 gene_biotype:protein_coding transcript_biotype:protein_coding // interleukin 13 receptor, alpha 1 // Mus musculus interleukin 13 receptor, alpha 1, mRNA (cDNA clone MGC:63442 IMAGE:6835500), complete cds. // Mus musculus interleukin 13 receptor, alpha 1, mRN…	chrX	+	36112110	36171262	GO:0019221 // GO:0019221 // GO:0019221 // GO:0019221	cytokine-mediated signaling pathway // cytokine-mediated signaling pathway // cytokine-mediated signaling pathway // cytokine-mediated signaling pathway	inferred from electronic annotation // inferred from electronic annotation // inferred from electronic annotation // inferred from electronic annotation	GO:0016020 // GO:0016021 // GO:0016020 // GO:0016021 // GO:0016020 // GO:0016021 // GO:0016020 // GO:0016021	membrane // integral to membrane // membrane // integral to membrane // membrane // integral to membrane // membrane // integral to membrane	inferred from electronic annotation // inferred from electronic annotation // inferred from electronic annotation // inferred from electronic annotation // inferred from electronic annotation // inferred from electronic annotation // inferred from electronic annotation // inferred from electronic annotation	GO:0004896 // GO:0016515 // GO:0004896 // GO:0016515 // GO:0005515 // GO:0004896 // GO:0016515 // GO:0004896 // GO:0016515	cytokine receptor activity // interleukin-13 receptor activity // cytokine receptor activity // interleukin-13 receptor activity // protein binding // cytokine receptor activity // interleukin-13 receptor activity // cytokine receptor activity // interleukin-13 receptor activity	inferred from electronic annotation // not recorded // inferred from electronic annotation // not recorded // inferred from electronic annotation // inferred from electronic annotation // not recorded // inferred from electronic annotation // not recorded	---	---	Pfam	IPR015321	Interleukin-6 receptor alpha chain, binding	main					8.72903	8.7044	8.24001	5.73467	5.51378	5.66953
TC1700000684.mm.1	H2-Q4	histocompatibility 2, Q region locus 4 // histocompatibility 2, Q region locus 4 // histocompatibility 2, Q region locus 4 // --- // histocompatibility 2, Q region locus 4 // histocompatibility 2, Q region locus 4 // ---	Coding	< 1e-07	< 1e-07	933.12	125.57	7.43	up	NM_001143689 // ENSMUST00000081435 // ENSMUST00000173975 // OTTMUST00000095617 // BC010602 // uc008chm.2 // OTTMUST00000095618	RefSeq // ENSEMBL // ENSEMBL // Havana transcript // GenBank // UCSC Genes // Havana transcript	Mus musculus histocompatibility 2, Q region locus 4 (H2-Q4), mRNA. // cdna:known chromosome:GRCm38:17:35379617:35384674:1 gene:ENSMUSG00000035929 gene_biotype:protein_coding transcript_biotype:protein_coding // cdna:known chromosome:GRCm38:17:35379617:35385290:1 gene:ENSMUSG00000035929 gene_biotype:protein_coding transcript_biotype:retained_intron // H2-Q4 histocompatibility 2, Q region locus 4 /…	chr17	+	35379617	35385290	GO:0001916 // GO:0002474 // GO:0006955 // GO:0008150 // GO:0019882 // GO:0006955 // GO:0008150 // GO:0019882 // GO:0001916 // GO:0002474 // GO:0001916 // GO:0002474 // GO:0006955 // GO:0008150 // GO:0019882 // GO:0001916 // GO:0002474 // GO:0006955 // GO:0008150 // GO:0019882	positive regulation of T cell mediated cytotoxicity // antigen processing and presentation of peptide antigen via MHC class I // immune response // biological_process // antigen processing and presentation // immune response // biological_process // antigen processing and presentation // positive regulation of T cell mediated cytotoxicity // antigen processing and presentation of peptide antigen …	inferred from electronic annotation // inferred from electronic annotation // inferred from electronic annotation // no biological data available // inferred from electronic annotation // inferred from electronic annotation // no biological data available // inferred from electronic annotation // inferred from electronic annotation // inferred from electronic annotation // inferred from electroni…	GO:0005575 // GO:0016020 // GO:0042612 // GO:0005575 // GO:0016020 // GO:0042612 // GO:0005575 // GO:0016020 // GO:0042612 // GO:0005575 // GO:0016020 // GO:0042612	cellular_component // membrane // MHC class I protein complex // cellular_component // membrane // MHC class I protein complex // cellular_component // membrane // MHC class I protein complex // cellular_component // membrane // MHC class I protein complex	no biological data available // inferred from electronic annotation // inferred from electronic annotation // no biological data available // inferred from electronic annotation // inferred from electronic annotation // no biological data available // inferred from electronic annotation // inferred from electronic annotation // no biological data available // inferred from electronic annotation /…	GO:0005102 // GO:0030881 // GO:0042277 // GO:0046982 // GO:0042605 // GO:0005102 // GO:0030881 // GO:0042277 // GO:0046982 // GO:0005515 // GO:0003674 // GO:0042605 // GO:0005102 // GO:0030881 // GO:0042277 // GO:0046982 // GO:0042605 // GO:0005102 // GO:0030881 // GO:0042277 // GO:0046982 // GO:0042605	receptor binding // beta-2-microglobulin binding // peptide binding // protein heterodimerization activity // peptide antigen binding // receptor binding // beta-2-microglobulin binding // peptide binding // protein heterodimerization activity // protein binding // molecular_function // peptide antigen binding // receptor binding // beta-2-microglobulin binding // peptide binding // protein heter…	not recorded // not recorded // not recorded // not recorded // inferred from electronic annotation // not recorded // not recorded // not recorded // not recorded // inferred from electronic annotation // no biological data available // inferred from electronic annotation // not recorded // not recorded // not recorded // not recorded // inferred from electronic annotation // not recorded // not…	---	---	Pfam // Pfam	IPR001039 // IPR003597	MHC class I, alpha chain, alpha1/alpha2 // Immunoglobulin C1-set	main				NONMMUT029440	9.88991	9.88957	9.8505	7.02725	6.92791	7.00933
TC1700002822.mm.1	H2-T9	histocompatibility 2, T region locus 9 // histocompatibility 2, T region locus 22 // histocompatibility 2, T region locus 9 // histocompatibility 2, T region locus 22 // histocompatibility 2, T region locus 22 // histocompatibility 2, T region locus 9 // histocompatibility 2, T region locus 22 // histocompatibility 2, T region locus 9 // histocompatibility 2, T region locus 22 // histocompatibili…	Coding	< 1e-07	< 1e-07	542.86	74.15	7.32	up	NM_010399 // NM_010397 // ENSMUST00000172633 // BC003819 // ENSMUST00000173280 // ENSMUST00000080015 // ENSMUST00000077960 // uc008cjt.1 // uc008cju.1 // uc008cjv.1 // uc008cjw.1 // ENSMUST00000058801 // OTTMUST00000095271 // OTTMUST00000035506 // OTTMUST00000095272 // OTTMUST00000035504 // OTTMUST00000035505	RefSeq // RefSeq // ENSEMBL // GenBank // ENSEMBL // ENSEMBL // ENSEMBL // UCSC Genes // UCSC Genes // UCSC Genes // UCSC Genes // ENSEMBL // Havana transcript // Havana transcript // Havana transcript // Havana transcript // Havana transcript	Mus musculus histocompatibility 2, T region locus 9 (H2-T9), mRNA. // Mus musculus histocompatibility 2, T region locus 22 (H2-T22), mRNA. // cdna:known chromosome:GRCm38:17:36037128:36042500:-1 gene:ENSMUSG00000056116 gene_biotype:protein_coding transcript_biotype:retained_intron // Mus musculus histocompatibility 2, T region locus 22, mRNA (cDNA clone MGC:6180 IMAGE:3484613), complete cds. // c…	chr17	-	36037128	36042747	GO:0001916 // GO:0002474 // GO:0006955 // GO:0008150 // GO:0019882 // GO:0001916 // GO:0002474 // GO:0006955 // GO:0008150 // GO:0019882 // GO:0001916 // GO:0002474 // GO:0006955 // GO:0008150 // GO:0019882 // GO:0001916 // GO:0002474 // GO:0006955 // GO:0008150 // GO:0019882 // GO:0008150 // GO:0001916 // GO:0002474 // GO:0006955 // GO:0019882 // GO:0006955 // GO:0008150 // GO:0019882 // GO:0001…	positive regulation of T cell mediated cytotoxicity // antigen processing and presentation of peptide antigen via MHC class I // immune response // biological_process // antigen processing and presentation // positive regulation of T cell mediated cytotoxicity // antigen processing and presentation of peptide antigen via MHC class I // immune response // biological_process // antigen processing a…	inferred from electronic annotation // inferred from electronic annotation // inferred from electronic annotation // no biological data available // inferred from electronic annotation // inferred from electronic annotation // inferred from electronic annotation // inferred from electronic annotation // no biological data available // inferred from electronic annotation // inferred from electroni…	GO:0005575 // GO:0016020 // GO:0042612 // GO:0005575 // GO:0016020 // GO:0042612 // GO:0005575 // GO:0016020 // GO:0042612 // GO:0005575 // GO:0016020 // GO:0042612 // GO:0005575 // GO:0016020 // GO:0042612 // GO:0005575 // GO:0016020 // GO:0042612 // GO:0005575 // GO:0016020 // GO:0042612 // GO:0005575 // GO:0016020 // GO:0042612	cellular_component // membrane // MHC class I protein complex // cellular_component // membrane // MHC class I protein complex // cellular_component // membrane // MHC class I protein complex // cellular_component // membrane // MHC class I protein complex // cellular_component // membrane // MHC class I protein complex // cellular_component // membrane // MHC class I protein complex // cellular_…	no biological data available // inferred from electronic annotation // inferred from electronic annotation // no biological data available // inferred from electronic annotation // inferred from electronic annotation // no biological data available // inferred from electronic annotation // inferred from electronic annotation // no biological data available // inferred from electronic annotation /…	GO:0003674 // GO:0042605 // GO:0003674 // GO:0042605 // GO:0003674 // GO:0042605 // GO:0003674 // GO:0042605 // GO:0003674 // GO:0042605 // GO:0005515 // GO:0003674 // GO:0042605 // GO:0005515 // GO:0003674 // GO:0042605 // GO:0005515 // GO:0003674 // GO:0042605	molecular_function // peptide antigen binding // molecular_function // peptide antigen binding // molecular_function // peptide antigen binding // molecular_function // peptide antigen binding // molecular_function // peptide antigen binding // protein binding // molecular_function // peptide antigen binding // protein binding // molecular_function // peptide antigen binding // protein binding //…	no biological data available // inferred from electronic annotation // no biological data available // inferred from electronic annotation // no biological data available // inferred from electronic annotation // no biological data available // inferred from electronic annotation // no biological data available // inferred from electronic annotation // inferred from electronic annotation // no bi…	---	---	Pfam // Pfam // Pfam // Pfam // Pfam // Pfam	IPR001039 // IPR003597 // IPR001039 // IPR003597 // IPR001039 // IPR003597	MHC class I, alpha chain, alpha1/alpha2 // Immunoglobulin C1-set // MHC class I, alpha chain, alpha1/alpha2 // Immunoglobulin C1-set // MHC class I, alpha chain, alpha1/alpha2 // Immunoglobulin C1-set	main				NONMMUT029508 NONMMUT029513	9.16159	9.13432	8.98964	6.27195	6.16158	6.25124
TC1_GL456212_random00000008.mm.1	AC168977.2	N/A // activated spleen cDNA, RIKEN full-length enriched library, clone:F830106H21 product:unclassifiable, full insert sequence.	Coding	< 1e-07	< 1e-07	584.52	81.58	7.16	up	ENSMUST00000179715 // uc008idj.1	ENSEMBL // UCSC Genes	cdna:novel scaffold:GRCm38:GL456212.1:31967:34932:-1 gene:ENSMUSG00000094915 gene_biotype:protein_coding transcript_biotype:protein_coding // activated spleen cDNA, RIKEN full-length enriched library, clone:F830106H21 product:unclassifiable, full insert sequence.	chr1_GL456212_random	-	31113	45006	---	---	---	GO:0005634	nucleus	inferred from electronic annotation	---	---	---	---	---	Pfam	IPR004865	Sp100	main					9.42806	9.25667	8.92084	6.52469	6.1649	6.40848
TC1300000904.mm.1	Erap1	endoplasmic reticulum aminopeptidase 1 // endoplasmic reticulum aminopeptidase 1 // endoplasmic reticulum aminopeptidase 1 (Erap1), mRNA. // endoplasmic reticulum aminopeptidase 1 // endoplasmic reticulum aminopeptidase 1	Coding	< 1e-07	< 1e-07	434.98	61.49	7.07	up	NM_030711 // ENSMUST00000169114 // uc007rfi.1 // uc007rfj.1 // BC046610	RefSeq // ENSEMBL // UCSC Genes // UCSC Genes // GenBank	Mus musculus endoplasmic reticulum aminopeptidase 1 (Erap1), mRNA. // cdna:known chromosome:GRCm38:13:74639872:74691875:1 gene:ENSMUSG00000021583 gene_biotype:protein_coding transcript_biotype:protein_coding // endoplasmic reticulum aminopeptidase 1 (Erap1), mRNA. // endoplasmic reticulum aminopeptidase 1 // Mus musculus endoplasmic reticulum aminopeptidase 1, mRNA (cDNA clone MGC:54451 IMAGE:639…	chr13	+	74639866	74691875	GO:0006508 // GO:0006509 // GO:0008152 // GO:0008152 // GO:0045766 // GO:0006508 // GO:0006509 // GO:0006508 // GO:0006509 // GO:0008152 // GO:0008152 // GO:0045766 // GO:0006509 // GO:0006509 // GO:0009617 // GO:0006508 // GO:0006508 // GO:0006509 // GO:0008152 // GO:0008152 // GO:0045766 // GO:0006508 // GO:0006509	proteolysis // membrane protein ectodomain proteolysis // metabolic process // metabolic process // positive regulation of angiogenesis // proteolysis // membrane protein ectodomain proteolysis // proteolysis // membrane protein ectodomain proteolysis // metabolic process // metabolic process // positive regulation of angiogenesis // membrane protein ectodomain proteolysis // membrane protein ect…	not recorded // not recorded // inferred from direct assay // inferred from electronic annotation // inferred from mutant phenotype // inferred from electronic annotation // inferred from sequence or structural similarity // not recorded // not recorded // inferred from direct assay // inferred from electronic annotation // inferred from mutant phenotype // inferred from sequence or structural si…	GO:0005576 // GO:0005737 // GO:0005783 // GO:0005788 // GO:0016020 // GO:0016021 // GO:0043231 // GO:0005576 // GO:0005789 // GO:0005576 // GO:0005737 // GO:0005783 // GO:0005788 // GO:0016020 // GO:0016021 // GO:0043231 // GO:0005576 // GO:0005576 // GO:0005788 // GO:0005789 // GO:0005576 // GO:0005737 // GO:0005783 // GO:0005788 // GO:0016020 // GO:0016021 // GO:0043231 // GO:0005576 // GO:0005…	extracellular region // cytoplasm // endoplasmic reticulum // endoplasmic reticulum lumen // membrane // integral to membrane // intracellular membrane-bounded organelle // extracellular region // endoplasmic reticulum membrane // extracellular region // cytoplasm // endoplasmic reticulum // endoplasmic reticulum lumen // membrane // integral to membrane // intracellular membrane-bounded organell…	not recorded // inferred from direct assay // inferred from electronic annotation // not recorded // inferred from electronic annotation // inferred from electronic annotation // not recorded // inferred from sequence or structural similarity // inferred from electronic annotation // not recorded // inferred from direct assay // inferred from electronic annotation // not recorded // inferred from…	GO:0004177 // GO:0004177 // GO:0005138 // GO:0005164 // GO:0008233 // GO:0008235 // GO:0008237 // GO:0008270 // GO:0016787 // GO:0046872 // GO:0004177 // GO:0004177 // GO:0005138 // GO:0008235 // GO:0008270 // GO:0004177 // GO:0004177 // GO:0005138 // GO:0005164 // GO:0008233 // GO:0008235 // GO:0008237 // GO:0008270 // GO:0016787 // GO:0046872 // GO:0005515 // GO:0004177 // GO:0004177 // GO:0008…	aminopeptidase activity // aminopeptidase activity // interleukin-6 receptor binding // tumor necrosis factor receptor binding // peptidase activity // metalloexopeptidase activity // metallopeptidase activity // zinc ion binding // hydrolase activity // metal ion binding // aminopeptidase activity // aminopeptidase activity // interleukin-6 receptor binding // metalloexopeptidase activity // zin…	inferred from direct assay // not recorded // not recorded // not recorded // inferred from electronic annotation // not recorded // inferred from electronic annotation // not recorded // inferred from electronic annotation // inferred from electronic annotation // inferred from electronic annotation // inferred from sequence or structural similarity // inferred from sequence or structural simila…	GenMAPP // GenMAPP // GenMAPP	Circadian_Exercise // Circadian_Exercise // Circadian_Exercise	Pfam	IPR014782	Peptidase M1, membrane alanine aminopeptidase, N-terminal	main			NONMMUT018353 348bp;		8.8642	8.84726	8.61519	6.01889	5.93451	5.92098
TC1700000685.mm.1	H2-Q5	histocompatibility 2, Q region locus 5 // histocompatibility 2, Q region locus 5 // histocompatibility 2, Q region locus 5 // histocompatibility 2, Q region locus 5 // histocompatibility 2, Q region locus 5 (H2-Q5), non-coding RNA. // histocompatibility 2, Q region locus 5 // --- // ---	Coding	< 1e-07	< 1e-07	1134.77	166.44	6.82	up	XM_003688944 // NR_051981 // ENSMUST00000174854 // ENSMUST00000172979 // ENSMUST00000116010 // uc008chn.1 // uc008cho.1 // BC160245 // OTTMUST00000095865 // OTTMUST00000095866	MGI/Jackson Lab // RefSeq // ENSEMBL // ENSEMBL // ENSEMBL // UCSC Genes // UCSC Genes // GenBank // Havana transcript // Havana transcript	histocompatibility 2, Q region locus 5 // Mus musculus histocompatibility 2, Q region locus 5 (H2-Q5), non-coding RNA. // cdna:putative chromosome:GRCm38:17:35394126:35395632:1 gene:ENSMUSG00000055413 gene_biotype:pseudogene transcript_biotype:processed_transcript // cdna:pseudogene chromosome:GRCm38:17:35394126:35397588:1 gene:ENSMUSG00000055413 gene_biotype:pseudogene transcript_biotype:unproce…	chr17	+	35394099	35397805	GO:0001916 // GO:0002474 // GO:0006955 // GO:0019882 // GO:0001916 // GO:0002474 // GO:0006955 // GO:0019882 // GO:0001916 // GO:0002474 // GO:0006955 // GO:0019882 // GO:0001916 // GO:0002474 // GO:0006955 // GO:0019882	positive regulation of T cell mediated cytotoxicity // antigen processing and presentation of peptide antigen via MHC class I // immune response // antigen processing and presentation // positive regulation of T cell mediated cytotoxicity // antigen processing and presentation of peptide antigen via MHC class I // immune response // antigen processing and presentation // positive regulation of T …	inferred from electronic annotation // inferred from electronic annotation // inferred from electronic annotation // inferred from electronic annotation // inferred from electronic annotation // inferred from electronic annotation // inferred from electronic annotation // inferred from electronic annotation // inferred from electronic annotation // inferred from electronic annotation // inferred …	GO:0016020 // GO:0042612 // GO:0016020 // GO:0042612 // GO:0016020 // GO:0042612 // GO:0016020 // GO:0042612	membrane // MHC class I protein complex // membrane // MHC class I protein complex // membrane // MHC class I protein complex // membrane // MHC class I protein complex	inferred from electronic annotation // inferred from electronic annotation // inferred from electronic annotation // inferred from electronic annotation // inferred from electronic annotation // inferred from electronic annotation // inferred from electronic annotation // inferred from electronic annotation	GO:0042605 // GO:0042605 // GO:0042605 // GO:0042605	peptide antigen binding // peptide antigen binding // peptide antigen binding // peptide antigen binding	inferred from electronic annotation // inferred from electronic annotation // inferred from electronic annotation // inferred from electronic annotation	---	---	---	---	---	main			ENSMUST00000173278 2994bp;		10.1381	10.2019	10.1367	7.40436	7.34337	7.43652
TC0300002718.mm.1	Csf1	colony stimulating factor 1 (macrophage) // colony stimulating factor 1 (macrophage) // colony stimulating factor 1 (macrophage) // colony stimulating factor 1 (macrophage) // colony stimulating factor 1 (macrophage) // colony stimulating factor 1 (macrophage) // colony stimulating factor 1 (macrophage) // colony stimulating factor 1 (macrophage) // colony stimulating factor 1 (macrophage) // col…	Coding	< 1e-07	< 1e-07	730.09	109.82	6.65	up	NM_007778 // NM_001113529 // NM_001113530 // ENSMUST00000118593 // ENSMUST00000014743 // ENSMUST00000120654 // ENSMUST00000120243 // ENSMUST00000155557 // ENSMUST00000156820 // ENSMUST00000153114 // OTTMUST00000065739 // uc008qxl.2 // uc008qxm.1 // uc008qxn.1 // BC066187 // OTTMUST00000065742 // uc008qxk.2 // OTTMUST00000065744 // OTTMUST00000065740 // OTTMUST00000065741 // OTTMUST00000065745 // …	RefSeq // RefSeq // RefSeq // ENSEMBL // ENSEMBL // ENSEMBL // ENSEMBL // ENSEMBL // ENSEMBL // ENSEMBL // Havana transcript // UCSC Genes // UCSC Genes // UCSC Genes // GenBank // Havana transcript // UCSC Genes // Havana transcript // Havana transcript // Havana transcript // Havana transcript // Havana transcript	Mus musculus colony stimulating factor 1 (macrophage) (Csf1), transcript variant 1, mRNA. // Mus musculus colony stimulating factor 1 (macrophage) (Csf1), transcript variant 2, mRNA. // Mus musculus colony stimulating factor 1 (macrophage) (Csf1), transcript variant 3, mRNA. // cdna:known chromosome:GRCm38:3:107741048:107760236:-1 gene:ENSMUSG00000014599 gene_biotype:protein_coding transcript_bio…	chr3	-	107741048	107760469	GO:0001503 // GO:0001954 // GO:0002158 // GO:0003006 // GO:0006954 // GO:0008283 // GO:0008284 // GO:0010628 // GO:0010744 // GO:0030225 // GO:0030278 // GO:0030316 // GO:0030335 // GO:0032270 // GO:0032946 // GO:0040018 // GO:0042476 // GO:0042488 // GO:0045087 // GO:0045651 // GO:0045651 // GO:0045657 // GO:0045672 // GO:0045672 // GO:0045672 // GO:0045672 // GO:0045860 // GO:0046579 // GO:0048…	ossification // positive regulation of cell-matrix adhesion // osteoclast proliferation // developmental process involved in reproduction // inflammatory response // cell proliferation // positive regulation of cell proliferation // positive regulation of gene expression // positive regulation of macrophage derived foam cell differentiation // macrophage differentiation // regulation of ossificat…	not recorded // inferred from genetic interaction // inferred from direct assay // inferred from mutant phenotype // inferred from electronic annotation // not recorded // not recorded // not recorded // not recorded // not recorded // inferred from mutant phenotype // not recorded // inferred from genetic interaction // not recorded // not recorded // inferred from mutant phenotype // not record…	GO:0005576 // GO:0005615 // GO:0005886 // GO:0016020 // GO:0016021 // GO:0043235 // GO:0048471 // GO:0005615 // GO:0048471 // GO:0005576 // GO:0005615 // GO:0005886 // GO:0016020 // GO:0016021 // GO:0043235 // GO:0048471 // GO:0005615 // GO:0048471 // GO:0005576 // GO:0005615 // GO:0005886 // GO:0016020 // GO:0016021 // GO:0043235 // GO:0048471 // GO:0005615 // GO:0048471 // GO:0005576 // GO:0005…	extracellular region // extracellular space // plasma membrane // membrane // integral to membrane // receptor complex // perinuclear region of cytoplasm // extracellular space // perinuclear region of cytoplasm // extracellular region // extracellular space // plasma membrane // membrane // integral to membrane // receptor complex // perinuclear region of cytoplasm // extracellular space // peri…	inferred from electronic annotation // not recorded // inferred from electronic annotation // inferred from electronic annotation // inferred from electronic annotation // inferred from direct assay // not recorded // inferred from electronic annotation // inferred from electronic annotation // inferred from electronic annotation // not recorded // inferred from electronic annotation // inferred …	GO:0005125 // GO:0005157 // GO:0005515 // GO:0008083 // GO:0042803 // GO:0042803 // GO:0005125 // GO:0008083 // GO:0005125 // GO:0005157 // GO:0005515 // GO:0008083 // GO:0042803 // GO:0042803 // GO:0005125 // GO:0008083 // GO:0005125 // GO:0005157 // GO:0005515 // GO:0008083 // GO:0042803 // GO:0042803 // GO:0005125 // GO:0008083 // GO:0005125 // GO:0005157 // GO:0005515 // GO:0008083 // GO:0042…	cytokine activity // macrophage colony-stimulating factor receptor binding // protein binding // growth factor activity // protein homodimerization activity // protein homodimerization activity // cytokine activity // growth factor activity // cytokine activity // macrophage colony-stimulating factor receptor binding // protein binding // growth factor activity // protein homodimerization activit…	not recorded // inferred from physical interaction // inferred from physical interaction // not recorded // inferred from physical interaction // not recorded // inferred from electronic annotation // inferred from electronic annotation // not recorded // inferred from physical interaction // inferred from physical interaction // not recorded // inferred from physical interaction // not recorded …	---	---	Pfam // Pfam // Pfam // Pfam // Pfam // Pfam	IPR008001 // IPR008001 // IPR008001 // IPR008001 // IPR008001 // IPR008001	Macrophage colony stimulating factor-1 // Macrophage colony stimulating factor-1 // Macrophage colony stimulating factor-1 // Macrophage colony stimulating factor-1 // Macrophage colony stimulating factor-1 // Macrophage colony stimulating factor-1	main			KnowTID_00005162 3097bp;		9.68513	9.53192	9.35096	6.86518	6.72955	6.78981
TC1700002819.mm.1	H2-T23	histocompatibility 2, T region locus 23 // RIKEN cDNA C920025E04 gene // histocompatibility 2, T region locus 23 // RIKEN cDNA C920025E04 gene // histocompatibility 2, T region locus 23 // RIKEN cDNA C920025E04 gene // histocompatibility 2, T region locus 23 // RIKEN cDNA C920025E04 gene // histocompatibility 2, T region locus 23 // histocompatibility 2, T region locus 23 // histocompatibility 2,…	Coding	< 1e-07	< 1e-07	324.64	49.47	6.56	up	NM_010398 // ENSMUST00000174161 // ENSMUST00000102678 // ENSMUST00000174839 // ENSMUST00000174471 // uc008cjr.1 // BC099472 // OTTMUST00000096069 // OTTMUST00000035507 // OTTMUST00000096070 // OTTMUST00000096071	RefSeq // ENSEMBL // ENSEMBL // ENSEMBL // ENSEMBL // UCSC Genes // GenBank // Havana transcript // Havana transcript // Havana transcript // Havana transcript	Mus musculus histocompatibility 2, T region locus 23 (H2-T23), mRNA. // cdna:known chromosome:GRCm38:17:36029773:36032541:-1 gene:ENSMUSG00000067212 gene_biotype:protein_coding transcript_biotype:retained_intron // cdna:known chromosome:GRCm38:17:36029976:36032855:-1 gene:ENSMUSG00000067212 gene_biotype:protein_coding transcript_biotype:protein_coding // cdna:known chromosome:GRCm38:17:36030020:3…	chr17	-	36029773	36032855	GO:0001916 // GO:0002474 // GO:0002489 // GO:0006955 // GO:0019882 // GO:0048839 // GO:0001916 // GO:0008150 // GO:0001916 // GO:0002474 // GO:0002489 // GO:0006955 // GO:0019882 // GO:0048839 // GO:0001916 // GO:0008150 // GO:0001916 // GO:0002474 // GO:0002489 // GO:0006955 // GO:0019882 // GO:0048839 // GO:0001916 // GO:0008150 // GO:0001916 // GO:0002474 // GO:0002489 // GO:0006955 // GO:0019…	positive regulation of T cell mediated cytotoxicity // antigen processing and presentation of peptide antigen via MHC class I // antigen processing and presentation of endogenous peptide antigen via MHC class Ib via ER pathway, TAP-dependent // immune response // antigen processing and presentation // inner ear development // positive regulation of T cell mediated cytotoxicity // biological_proce…	inferred from direct assay // inferred from electronic annotation // inferred from direct assay // inferred from electronic annotation // inferred from electronic annotation // inferred from direct assay // inferred from electronic annotation // no biological data available // inferred from direct assay // inferred from electronic annotation // inferred from direct assay // inferred from electron…	GO:0016020 // GO:0016021 // GO:0042612 // GO:0030670 // GO:0071556 // GO:0005575 // GO:0016020 // GO:0016021 // GO:0042612 // GO:0030670 // GO:0071556 // GO:0005575 // GO:0016020 // GO:0016021 // GO:0042612 // GO:0030670 // GO:0071556 // GO:0005575 // GO:0016020 // GO:0016021 // GO:0042612 // GO:0030670 // GO:0071556 // GO:0005575 // GO:0016020 // GO:0016021 // GO:0042612 // GO:0030670 // GO:0071…	membrane // integral to membrane // MHC class I protein complex // phagocytic vesicle membrane // integral to lumenal side of endoplasmic reticulum membrane // cellular_component // membrane // integral to membrane // MHC class I protein complex // phagocytic vesicle membrane // integral to lumenal side of endoplasmic reticulum membrane // cellular_component // membrane // integral to membrane //…	inferred from electronic annotation // inferred from electronic annotation // inferred from electronic annotation // traceable author statement // traceable author statement // no biological data available // inferred from electronic annotation // inferred from electronic annotation // inferred from electronic annotation // traceable author statement // traceable author statement // no biological…	GO:0042605 // GO:0003674 // GO:0042605 // GO:0003674 // GO:0005515 // GO:0042605 // GO:0003674 // GO:0042605 // GO:0003674 // GO:0042605 // GO:0003674 // GO:0042605 // GO:0003674	peptide antigen binding // molecular_function // peptide antigen binding // molecular_function // protein binding // peptide antigen binding // molecular_function // peptide antigen binding // molecular_function // peptide antigen binding // molecular_function // peptide antigen binding // molecular_function	inferred from electronic annotation // no biological data available // inferred from electronic annotation // no biological data available // inferred from electronic annotation // inferred from electronic annotation // no biological data available // inferred from electronic annotation // no biological data available // inferred from electronic annotation // no biological data available // infer…	---	---	Pfam // Pfam	IPR001039 // IPR003597	MHC class I, alpha chain, alpha1/alpha2 // Immunoglobulin C1-set	main			NONMMUT029512 9072bp;	NONMMUT029508 NONMMUT029513	8.41332	8.34585	8.30119	5.72968	5.56201	5.64153
TC1000003213.mm.1	Gp49a	glycoprotein 49 A // glycoprotein 49 A // glycoprotein 49 A // glycoprotein 49 A (Gp49a), mRNA. // glycoprotein 49 A // glycoprotein 49 A (Gp49a), mRNA. // glycoprotein 49 A (Gp49a), mRNA. // glycoprotein 49 A // --- // ---	Coding	< 1e-07	< 1e-07	86.29	13.62	6.34	up	NM_008147 // ENSMUST00000102894 // ENSMUST00000139982 // uc007fam.1 // uc007fan.1 // uc007faq.1 // uc007fap.1 // uc007fao.1 // OTTMUST00000039859 // OTTMUST00000039860	RefSeq // ENSEMBL // ENSEMBL // UCSC Genes // UCSC Genes // UCSC Genes // UCSC Genes // UCSC Genes // Havana transcript // Havana transcript	Mus musculus glycoprotein 49 A (Gp49a), mRNA. // cdna:known chromosome:GRCm38:10:51480632:51486316:1 gene:ENSMUSG00000089672 gene_biotype:protein_coding transcript_biotype:protein_coding // cdna:known chromosome:GRCm38:10:51480678:51485748:1 gene:ENSMUSG00000089672 gene_biotype:protein_coding transcript_biotype:processed_transcript // glycoprotein 49 A (Gp49a), mRNA. // glycoprotein 49 A // glyco…	chr10	+	51480632	51486316	---	---	---	GO:0016020 // GO:0016021 // GO:0016020 // GO:0016021 // GO:0016020 // GO:0016021	membrane // integral to membrane // membrane // integral to membrane // membrane // integral to membrane	inferred from electronic annotation // inferred from electronic annotation // inferred from electronic annotation // inferred from electronic annotation // inferred from electronic annotation // inferred from electronic annotation	GO:0005515	protein binding	inferred from electronic annotation	---	---	---	---	---	main					6.49227	6.66776	6.16534	3.75415	3.82221	3.77296
TC1100004291.mm.1	Psme2	proteasome (prosome, macropain) 28 subunit, beta // ---	Coding	< 1e-07	< 1e-07	625.32	98.99	6.32	up	NM_001281472 // ENSMUST00000104958 // OTTMUST00000012300	RefSeq // ENSEMBL // Havana transcript	protease (prosome, macropain) activator subunit 2B // cdna:known chromosome:GRCm38:11:48945354:48946190:-1 gene:ENSMUSG00000078153 gene_biotype:protein_coding transcript_biotype:protein_coding // protease (prosome, macropain) 28 subunit beta B, pseudogene	chr11	-	48945352	48946410	GO:0010950 // GO:0019884	positive regulation of endopeptidase activity // antigen processing and presentation of exogenous antigen	inferred from physical interaction // inferred from mutant phenotype	GO:0008537 // GO:0000502	proteasome activator complex // proteasome complex	inferred from electronic annotation // inferred from electronic annotation	GO:0005515 // GO:0061133	protein binding // endopeptidase activator activity	inferred from physical interaction // inferred from physical interaction	GenMAPP	Proteasome_Degradation	Pfam // Pfam	IPR003185 // IPR003186	Proteasome activator pa28, REG alpha subunit // Proteasome activator pa28, REG beta subunit	main		NONMMUT009535			9.30377	9.35452	9.23929	6.61108	6.59678	6.72741
TC0100000758.mm.1	Gm7592	predicted gene 7592 // predicted gene 7592 // component of Sp100-rs (Csprs), mRNA. // component of Sp100-rs (Csprs), mRNA. // ---	Coding	< 1e-07	< 1e-07	617.54	101.59	6.08	up	XM_979370 // ENSMUST00000159601 // ENSMUST00000160674 // uc007btw.1 // uc007btx.1 // uc007bty.1 // uc029qqx.1 // OTTMUST00000074564	MGI/Jackson Lab // ENSEMBL // ENSEMBL // UCSC Genes // UCSC Genes // UCSC Genes // UCSC Genes // Havana transcript	predicted gene 7592 // cdna:pseudogene chromosome:GRCm38:1:85526602:85552178:1 gene:ENSMUSG00000090186 gene_biotype:pseudogene transcript_biotype:unprocessed_pseudogene // cdna:pseudogene chromosome:GRCm38:1:85526690:85550577:1 gene:ENSMUSG00000090186 gene_biotype:pseudogene transcript_biotype:unprocessed_pseudogene // activated spleen cDNA, RIKEN full-length enriched library, clone:F830110B15 pr…	chr1	+	85526602	85552185	GO:0007186 // GO:0007186	G-protein coupled receptor signaling pathway // G-protein coupled receptor signaling pathway	inferred from electronic annotation // inferred from electronic annotation	GO:0005634 // GO:0016021 // GO:0005634 // GO:0016021	nucleus // integral to membrane // nucleus // integral to membrane	inferred from electronic annotation // inferred from electronic annotation // inferred from electronic annotation // inferred from electronic annotation	GO:0004930 // GO:0004930	G-protein coupled receptor activity // G-protein coupled receptor activity	inferred from electronic annotation // inferred from electronic annotation	---	---	---	---	---	main				OTTMUST00000077949	9.4184	9.34415	9.08079	6.75003	6.54817	6.74914
TC1800001181.mm.1	Tmem173	transmembrane protein 173 // transmembrane protein 173 // transmembrane protein 173 // transmembrane protein 173 (Tmem173), nuclear gene encoding mitochondrial protein, mRNA. // transmembrane protein 173 (Tmem173), nuclear gene encoding mitochondrial protein, mRNA. // transmembrane protein 173	Coding	< 1e-07	< 1e-07	274.32	46.24	5.93	up	NM_028261 // NM_001289591 // NM_001289592 // ENSMUST00000115728 // uc008emt.3 // uc008emv.3 // uc008emu.3 // BC046640	RefSeq // RefSeq // RefSeq // ENSEMBL // UCSC Genes // UCSC Genes // UCSC Genes // GenBank	Mus musculus transmembrane protein 173 (Tmem173), nuclear gene encoding mitochondrial protein, mRNA. // transmembrane protein 173 (Tmem173), transcript variant 2, mRNA. // transmembrane protein 173 (Tmem173), transcript variant 3, mRNA. // cdna:known chromosome:GRCm38:18:35733678:35740554:-1 gene:ENSMUSG00000024349 gene_biotype:protein_coding transcript_biotype:protein_coding // transmembrane pro…	chr18	-	35733678	35740554	GO:0002218 // GO:0002230 // GO:0006915 // GO:0032092 // GO:0032608 // GO:0032608 // GO:0033160 // GO:0035458 // GO:0042993 // GO:0045087 // GO:0045087 // GO:0045944 // GO:0045944 // GO:0051607 // GO:0051607 // GO:0071360 // GO:0002218 // GO:0002218 // GO:0002230 // GO:0032092 // GO:0032608 // GO:0032608 // GO:0033160 // GO:0042993 // GO:0045087 // GO:0045087 // GO:0051607 // GO:0051607 // GO:0071…	activation of innate immune response // positive regulation of defense response to virus by host // apoptotic process // positive regulation of protein binding // interferon-beta production // interferon-beta production // positive regulation of protein import into nucleus, translocation // cellular response to interferon-beta // positive regulation of transcription factor import into nucleus // …	not recorded // not recorded // inferred from electronic annotation // not recorded // inferred from mutant phenotype // not recorded // not recorded // inferred from mutant phenotype // not recorded // inferred from mutant phenotype // not recorded // inferred from direct assay // not recorded // inferred from mutant phenotype // not recorded // not recorded // inferred from electronic annotatio…	GO:0005737 // GO:0005739 // GO:0005741 // GO:0005777 // GO:0005783 // GO:0005789 // GO:0005789 // GO:0005794 // GO:0005886 // GO:0016020 // GO:0016021 // GO:0048471 // GO:0005741 // GO:0005783 // GO:0005789 // GO:0005789 // GO:0048471 // GO:0005737 // GO:0005739 // GO:0005741 // GO:0005777 // GO:0005783 // GO:0005789 // GO:0005789 // GO:0005794 // GO:0005886 // GO:0016020 // GO:0016021 // GO:0048…	cytoplasm // mitochondrion // mitochondrial outer membrane // peroxisome // endoplasmic reticulum // endoplasmic reticulum membrane // endoplasmic reticulum membrane // Golgi apparatus // plasma membrane // membrane // integral to membrane // perinuclear region of cytoplasm // mitochondrial outer membrane // endoplasmic reticulum // endoplasmic reticulum membrane // endoplasmic reticulum membrane…	inferred from electronic annotation // inferred from electronic annotation // not recorded // inferred from direct assay // inferred from direct assay // inferred from direct assay // not recorded // inferred from direct assay // inferred from electronic annotation // inferred from electronic annotation // inferred from electronic annotation // inferred from direct assay // inferred from electron…	GO:0000166 // GO:0005515 // GO:0008134 // GO:0019901 // GO:0031625 // GO:0035438 // GO:0042803 // GO:0008134 // GO:0019901 // GO:0035438 // GO:0035438 // GO:0042803 // GO:0042803 // GO:0061507 // GO:0000166 // GO:0005515 // GO:0008134 // GO:0019901 // GO:0031625 // GO:0035438 // GO:0042803 // GO:0005515 // GO:0008134 // GO:0019901 // GO:0035438 // GO:0042803 // GO:0042803 // GO:0035438 // GO:0061…	nucleotide binding // protein binding // transcription factor binding // protein kinase binding // ubiquitin protein ligase binding // cyclic-di-GMP binding // protein homodimerization activity // transcription factor binding // protein kinase binding // cyclic-di-GMP binding // cyclic-di-GMP binding // protein homodimerization activity // protein homodimerization activity // cyclic-GMP-AMP bindi…	inferred from electronic annotation // inferred from physical interaction // not recorded // not recorded // inferred from physical interaction // not recorded // not recorded // inferred from electronic annotation // inferred from electronic annotation // inferred from direct assay // inferred from electronic annotation // inferred from electronic annotation // inferred from sequence or structur…	---	---	---	---	---	main					8.28727	8.2104	7.83371	5.60406	5.42403	5.61279
TC1100001220.mm.1	Ccl7	chemokine (C-C motif) ligand 7 // chemokine (C-C motif) ligand 7 // chemokine (C-C motif) ligand 7 // chemokine (C-C motif) ligand 7 // ---	Coding	2e-07	1.96e-05	129.7	22.52	5.76	up	NM_013654 // ENSMUST00000021011 // uc007kmq.2 // BC061126 // OTTMUST00000001664	RefSeq // ENSEMBL // UCSC Genes // GenBank // Havana transcript	Mus musculus chemokine (C-C motif) ligand 7 (Ccl7), mRNA. // cdna:known chromosome:GRCm38:11:82045712:82047525:1 gene:ENSMUSG00000035373 gene_biotype:protein_coding transcript_biotype:protein_coding // chemokine (C-C motif) ligand 7 // Mus musculus chemokine (C-C motif) ligand 7, mRNA (cDNA clone MGC:74254 IMAGE:30276350), complete cds. // chemokine (C-C motif) ligand 7	chr11	+	82045712	82047525	GO:0006935 // GO:0006954 // GO:0006955 // GO:0007010 // GO:0008360 // GO:0030335 // GO:0048245 // GO:0071361 // GO:2000503 // GO:0007010 // GO:0008360 // GO:0010332 // GO:0030335 // GO:0048245 // GO:0071361 // GO:2000503 // GO:0006935 // GO:0006954 // GO:0006955 // GO:0007010 // GO:0008360 // GO:0030335 // GO:0048245 // GO:0071361 // GO:2000503 // GO:0007010 // GO:0008360 // GO:0010332 // GO:0030…	chemotaxis // inflammatory response // immune response // cytoskeleton organization // regulation of cell shape // positive regulation of cell migration // eosinophil chemotaxis // cellular response to ethanol // positive regulation of natural killer cell chemotaxis // cytoskeleton organization // regulation of cell shape // response to gamma radiation // positive regulation of cell migration // …	inferred from electronic annotation // inferred from electronic annotation // inferred from electronic annotation // not recorded // not recorded // not recorded // not recorded // not recorded // not recorded // inferred from electronic annotation // inferred from electronic annotation // inferred from electronic annotation // inferred from electronic annotation // inferred from electronic annot…	GO:0005576 // GO:0005615 // GO:0005576 // GO:0005615 // GO:0005576 // GO:0005615	extracellular region // extracellular space // extracellular region // extracellular space // extracellular region // extracellular space	inferred from electronic annotation // inferred from electronic annotation // inferred from electronic annotation // inferred from electronic annotation // inferred from electronic annotation // inferred from electronic annotation	GO:0005125 // GO:0008009 // GO:0008201 // GO:0031726 // GO:0031727 // GO:0008009 // GO:0031726 // GO:0005125 // GO:0008009 // GO:0008201 // GO:0031726 // GO:0031727 // GO:0008009 // GO:0031726 // GO:0005125 // GO:0008009 // GO:0008201 // GO:0031726 // GO:0031727 // GO:0008009 // GO:0031726	cytokine activity // chemokine activity // heparin binding // CCR1 chemokine receptor binding // CCR2 chemokine receptor binding // chemokine activity // CCR1 chemokine receptor binding // cytokine activity // chemokine activity // heparin binding // CCR1 chemokine receptor binding // CCR2 chemokine receptor binding // chemokine activity // CCR1 chemokine receptor binding // cytokine activity // …	inferred from electronic annotation // not recorded // inferred from electronic annotation // not recorded // inferred from physical interaction // inferred from electronic annotation // inferred from electronic annotation // inferred from electronic annotation // not recorded // inferred from electronic annotation // not recorded // inferred from physical interaction // inferred from electronic …	---	---	Pfam	IPR001811	Chemokine interleukin-8-like domain	main	NONMMUT011061 8259bp;				7.1673	7.08721	6.8347	4.2024	4.42935	4.89487
TC1700000761.mm.1	Ubd	ubiquitin D // ubiquitin D // ubiquitin D // ubiquitin D // ---	Coding	1e-06	6.48e-05	81.88	14.41	5.68	up	NM_023137 // ENSMUST00000038844 // uc008cmi.2 // BC027627 // OTTMUST00000096338	RefSeq // ENSEMBL // UCSC Genes // GenBank // Havana transcript	Mus musculus ubiquitin D (Ubd), mRNA. // cdna:known chromosome:GRCm38:17:37193892:37196095:1 gene:ENSMUSG00000035186 gene_biotype:protein_coding transcript_biotype:protein_coding // ubiquitin D // Mus musculus ubiquitin D, mRNA (cDNA clone MGC:41036 IMAGE:1068927), complete cds. // ubiquitin D	chr17	+	37193892	37196101	GO:0006511 // GO:0006511 // GO:0016567 // GO:0016567 // GO:0032446 // GO:0043011 // GO:0043065 // GO:0043065 // GO:0043123 // GO:0043123 // GO:0070842 // GO:0006511 // GO:0016567 // GO:0034341 // GO:0034341 // GO:0034612 // GO:0034612 // GO:0043011 // GO:0043011 // GO:0043065 // GO:0043065 // GO:0043123 // GO:0070842 // GO:0070842 // GO:0006511 // GO:0006511 // GO:0016567 // GO:0016567 // GO:0032…	ubiquitin-dependent protein catabolic process // ubiquitin-dependent protein catabolic process // protein ubiquitination // protein ubiquitination // protein modification by small protein conjugation // myeloid dendritic cell differentiation // positive regulation of apoptotic process // positive regulation of apoptotic process // positive regulation of I-kappaB kinase/NF-kappaB cascade // positi…	inferred from mutant phenotype // not recorded // inferred from mutant phenotype // not recorded // inferred by curator // not recorded // inferred from mutant phenotype // not recorded // inferred from mutant phenotype // not recorded // not recorded // inferred from electronic annotation // inferred from electronic annotation // inferred from electronic annotation // inferred from expression pa…	GO:0005634 // GO:0005634 // GO:0005737 // GO:0016235 // GO:0005634 // GO:0005737 // GO:0016235 // GO:0005634 // GO:0005634 // GO:0005737 // GO:0016235 // GO:0005634 // GO:0016235 // GO:0005737 // GO:0005634 // GO:0005634 // GO:0005737 // GO:0016235 // GO:0005634 // GO:0005737 // GO:0016235	nucleus // nucleus // cytoplasm // aggresome // nucleus // cytoplasm // aggresome // nucleus // nucleus // cytoplasm // aggresome // nucleus // aggresome // cytoplasm // nucleus // nucleus // cytoplasm // aggresome // nucleus // cytoplasm // aggresome	inferred from direct assay // not recorded // inferred from direct assay // not recorded // inferred from electronic annotation // inferred from electronic annotation // inferred from electronic annotation // inferred from direct assay // not recorded // inferred from direct assay // not recorded // inferred from electronic annotation // inferred from electronic annotation // inferred from electr…	GO:0005515 // GO:0070628 // GO:0070628 // GO:0070628 // GO:0005515 // GO:0070628 // GO:0005515 // GO:0070628 // GO:0070628 // GO:0005515 // GO:0070628 // GO:0070628 // GO:0070628	protein binding // proteasome binding // proteasome binding // proteasome binding // protein binding // proteasome binding // protein binding // proteasome binding // proteasome binding // protein binding // proteasome binding // proteasome binding // proteasome binding	inferred from physical interaction // not recorded // inferred from electronic annotation // inferred from sequence or structural similarity // inferred from physical interaction // not recorded // inferred from electronic annotation // inferred from sequence or structural similarity // inferred from electronic annotation // inferred from physical interaction // not recorded // inferred from elec…	---	---	Pfam // Pfam	IPR000626 // IPR022617	Ubiquitin // Small ubiquitin-related modifier, SUMO	main					6.66249	6.58867	5.84739	3.78875	3.92873	3.87697
TC0600001530.mm.1	Clec2d	C-type lectin domain family 2, member d // C-type lectin domain family 2, member d // C-type lectin domain family 2, member d // C-type lectin domain family 2, member d // ---	Coding	< 1e-07	< 1e-07	84.68	14.98	5.65	up	NM_053109 // ENSMUST00000032260 // uc009efe.2 // BC106776 // OTTMUST00000072287	RefSeq // ENSEMBL // UCSC Genes // GenBank // Havana transcript	Mus musculus C-type lectin domain family 2, member d (Clec2d), mRNA. // cdna:known chromosome:GRCm38:6:129180615:129186534:1 gene:ENSMUSG00000030157 gene_biotype:protein_coding transcript_biotype:protein_coding // C-type lectin domain family 2, member d // Mus musculus C-type lectin domain family 2, member d, mRNA (cDNA clone MGC:123478 IMAGE:40040181), complete cds. // C-type lectin domain famil…	chr6	+	129180615	129186535	GO:0006968 // GO:0007165 // GO:0042270 // GO:0042270 // GO:0045671 // GO:0006968 // GO:0007165 // GO:0042270 // GO:0042270 // GO:0045671 // GO:0006968 // GO:0007165 // GO:0042270 // GO:0042270 // GO:0045671	cellular defense response // signal transduction // protection from natural killer cell mediated cytotoxicity // protection from natural killer cell mediated cytotoxicity // negative regulation of osteoclast differentiation // cellular defense response // signal transduction // protection from natural killer cell mediated cytotoxicity // protection from natural killer cell mediated cytotoxicity /…	traceable author statement // inferred from sequence or structural similarity // inferred from direct assay // inferred from genetic interaction // inferred from direct assay // traceable author statement // inferred from sequence or structural similarity // inferred from direct assay // inferred from genetic interaction // inferred from direct assay // traceable author statement // inferred from…	GO:0005783 // GO:0005886 // GO:0005887 // GO:0009897 // GO:0009986 // GO:0016020 // GO:0016021 // GO:0009986 // GO:0005783 // GO:0005886 // GO:0005887 // GO:0009897 // GO:0009986 // GO:0016020 // GO:0016021 // GO:0009986 // GO:0005783 // GO:0005886 // GO:0005887 // GO:0009897 // GO:0009986 // GO:0016020 // GO:0016021 // GO:0009986	endoplasmic reticulum // plasma membrane // integral to plasma membrane // external side of plasma membrane // cell surface // membrane // integral to membrane // cell surface // endoplasmic reticulum // plasma membrane // integral to plasma membrane // external side of plasma membrane // cell surface // membrane // integral to membrane // cell surface // endoplasmic reticulum // plasma membrane …	not recorded // inferred from electronic annotation // traceable author statement // inferred from direct assay // not recorded // inferred from electronic annotation // inferred from electronic annotation // inferred from electronic annotation // not recorded // inferred from electronic annotation // traceable author statement // inferred from direct assay // not recorded // inferred from electr…	GO:0004888 // GO:0005515 // GO:0030246 // GO:0046703 // GO:0030246 // GO:0004888 // GO:0005515 // GO:0030246 // GO:0046703 // GO:0030246 // GO:0004888 // GO:0005515 // GO:0030246 // GO:0046703 // GO:0030246	transmembrane signaling receptor activity // protein binding // carbohydrate binding // natural killer cell lectin-like receptor binding // carbohydrate binding // transmembrane signaling receptor activity // protein binding // carbohydrate binding // natural killer cell lectin-like receptor binding // carbohydrate binding // transmembrane signaling receptor activity // protein binding // carbohy…	inferred from sequence or structural similarity // inferred from physical interaction // inferred from sequence or structural similarity // inferred from direct assay // inferred from electronic annotation // inferred from sequence or structural similarity // inferred from physical interaction // inferred from sequence or structural similarity // inferred from direct assay // inferred from electr…	---	---	Pfam // Pfam	IPR001304 // IPR008646	C-type lectin // Herpesvirus UL45-like	main	ENSMUST00000158965 5733bp;				6.66742	6.39791	6.17875	3.95807	3.92978	3.8733
TC0300002236.mm.1	Tlr2	toll-like receptor 2 // toll-like receptor 2 // toll-like receptor 2 // toll-like receptor 2	Coding	< 1e-07	< 1e-07	204.98	36.56	5.61	up	NM_011905 // ENSMUST00000029623 // uc008ppn.2 // BC014693	RefSeq // ENSEMBL // UCSC Genes // GenBank	Mus musculus toll-like receptor 2 (Tlr2), mRNA. // cdna:known chromosome:GRCm38:3:83836273:83841767:-1 gene:ENSMUSG00000027995 gene_biotype:protein_coding transcript_biotype:protein_coding // toll-like receptor 2 // Mus musculus toll-like receptor 2, mRNA (cDNA clone MGC:11394 IMAGE:3966249), complete cds.	chr3	-	83836272	83841767	GO:0002224 // GO:0002237 // GO:0002238 // GO:0002282 // GO:0002687 // GO:0002752 // GO:0002755 // GO:0006691 // GO:0006954 // GO:0006955 // GO:0007165 // GO:0007252 // GO:0008285 // GO:0009617 // GO:0030177 // GO:0032289 // GO:0032493 // GO:0032494 // GO:0032695 // GO:0032700 // GO:0032722 // GO:0032722 // GO:0032728 // GO:0032733 // GO:0032735 // GO:0032741 // GO:0032755 // GO:0032755 // GO:0032…	toll-like receptor signaling pathway // response to molecule of bacterial origin // response to molecule of fungal origin // microglial cell activation involved in immune response // positive regulation of leukocyte migration // cell surface pattern recognition receptor signaling pathway // MyD88-dependent toll-like receptor signaling pathway // leukotriene metabolic process // inflammatory respo…	not recorded // inferred from electronic annotation // inferred from mutant phenotype // not recorded // inferred from mutant phenotype // inferred from mutant phenotype // inferred from genetic interaction // not recorded // not recorded // inferred from electronic annotation // inferred from electronic annotation // not recorded // not recorded // inferred from mutant phenotype // not recorded …	GO:0005737 // GO:0005886 // GO:0005886 // GO:0009897 // GO:0009986 // GO:0016020 // GO:0016021 // GO:0031410 // GO:0035354 // GO:0035355 // GO:0042995 // GO:0044297 // GO:0005886 // GO:0030670 // GO:0035354 // GO:0005737 // GO:0009986 // GO:0035354 // GO:0005737 // GO:0005886 // GO:0005886 // GO:0009897 // GO:0009986 // GO:0016020 // GO:0016021 // GO:0031410 // GO:0035354 // GO:0035355 // GO:0042…	cytoplasm // plasma membrane // plasma membrane // external side of plasma membrane // cell surface // membrane // integral to membrane // cytoplasmic vesicle // Toll-like receptor 1-Toll-like receptor 2 protein complex // Toll-like receptor 2-Toll-like receptor 6 protein complex // cell projection // cell body // plasma membrane // phagocytic vesicle membrane // Toll-like receptor 1-Toll-like re…	not recorded // inferred from direct assay // not recorded // inferred from direct assay // not recorded // inferred from electronic annotation // inferred from electronic annotation // inferred from electronic annotation // not recorded // inferred from physical interaction // not recorded // not recorded // inferred from electronic annotation // inferred from electronic annotation // --- // inf…	GO:0004872 // GO:0004888 // GO:0005515 // GO:0008329 // GO:0042497 // GO:0042497 // GO:0042498 // GO:0042834 // GO:0046982 // GO:0046982 // GO:0070891 // GO:0071723 // GO:0042497 // GO:0046982 // GO:0004872 // GO:0008329 // GO:0042497 // GO:0042834 // GO:0046982 // GO:0004872 // GO:0004888 // GO:0005515 // GO:0008329 // GO:0042497 // GO:0042497 // GO:0042498 // GO:0042834 // GO:0046982 // GO:0046…	receptor activity // transmembrane signaling receptor activity // protein binding // signaling pattern recognition receptor activity // triacyl lipopeptide binding // triacyl lipopeptide binding // diacyl lipopeptide binding // peptidoglycan binding // protein heterodimerization activity // protein heterodimerization activity // lipoteichoic acid binding // lipopeptide binding // triacyl lipopept…	not recorded // inferred from electronic annotation // inferred from physical interaction // not recorded // inferred from direct assay // not recorded // inferred from direct assay // not recorded // inferred from physical interaction // not recorded // inferred from direct assay // not recorded // --- // --- // inferred from electronic annotation // inferred from electronic annotation // inferr…	---	---	Pfam // Pfam	IPR000157 // IPR001611	Toll/interleukin-1 receptor homology (TIR) domain // Leucine-rich repeat	main					7.69283	7.76739	7.61005	5.25108	5.45338	4.91951
TC0600002978.mm.1	Rassf4	Ras association (RalGDS/AF-6) domain family member 4 // Ras association (RalGDS/AF-6) domain family member 4 // Ras association (RalGDS/AF-6) domain family member 4 // Ras association (RalGDS/AF-6) domain family member 4 (Rassf4), mRNA. // Ras association (RalGDS/AF-6) domain family member 4 (Rassf4), mRNA. // Ras association (RalGDS/AF-6) domain family member 4 // Ras association (RalGDS/AF-6) d…	Coding	< 1e-07	< 1e-07	679.56	121.69	5.58	up	NM_178045 // ENSMUST00000035842 // uc009dkm.2 // uc009dkn.2 // uc009dko.3 // BC060709 // BC023245	RefSeq // ENSEMBL // UCSC Genes // UCSC Genes // UCSC Genes // GenBank // GenBank	Mus musculus Ras association (RalGDS/AF-6) domain family member 4 (Rassf4), mRNA. // cdna:known chromosome:GRCm38:6:116633008:116673836:-1 gene:ENSMUSG00000042129 gene_biotype:protein_coding transcript_biotype:protein_coding // Ras association (RalGDS/AF-6) domain family member 4 // Ras association (RalGDS/AF-6) domain family member 4 (Rassf4), mRNA. // Ras association (RalGDS/AF-6) domain family…	chr6	-	116633008	116673836	GO:0007049 // GO:0007165 // GO:0007049 // GO:0007165 // GO:0007049 // GO:0007165 // GO:0007049 // GO:0007165	cell cycle // signal transduction // cell cycle // signal transduction // cell cycle // signal transduction // cell cycle // signal transduction	inferred from electronic annotation // inferred from electronic annotation // inferred from electronic annotation // inferred from electronic annotation // inferred from electronic annotation // inferred from electronic annotation // inferred from electronic annotation // inferred from electronic annotation	GO:0005575 // GO:0005575 // GO:0005575 // GO:0005575	cellular_component // cellular_component // cellular_component // cellular_component	no biological data available // no biological data available // no biological data available // no biological data available	GO:0003674 // GO:0005515 // GO:0003674 // GO:0003674 // GO:0003674	molecular_function // protein binding // molecular_function // molecular_function // molecular_function	no biological data available // inferred from electronic annotation // no biological data available // no biological data available // no biological data available	---	---	Pfam	IPR000159	Ras-association	main		NR_106010	NONMMUT058534 4009bp;		9.59898	9.42908	9.2295	7.07553	6.86365	6.88958
TC0700000878.mm.1	Saa2	serum amyloid A 2 // serum amyloid A 2 // serum amyloid A 2 // serum amyloid A 2	Coding	< 1e-07	< 1e-07	242.36	43.98	5.51	up	NM_011314 // ENSMUST00000075982 // uc009gzb.2 // BC024606	RefSeq // ENSEMBL // UCSC Genes // GenBank	Mus musculus serum amyloid A 2 (Saa2), mRNA. // cdna:known chromosome:GRCm38:7:46751833:46754314:1 gene:ENSMUSG00000057465 gene_biotype:protein_coding transcript_biotype:protein_coding // serum amyloid A 2 // Mus musculus serum amyloid A 2, mRNA (cDNA clone MGC:18481 IMAGE:3662957), complete cds.	chr7	+	46751833	46754314	GO:0006953 // GO:0035634 // GO:0006953 // GO:0035634 // GO:0006953 // GO:0035634	acute-phase response // response to stilbenoid // acute-phase response // response to stilbenoid // acute-phase response // response to stilbenoid	inferred from electronic annotation // inferred from expression pattern // inferred from electronic annotation // inferred from expression pattern // inferred from electronic annotation // inferred from expression pattern	GO:0005576 // GO:0034364 // GO:0005576 // GO:0034364 // GO:0005576 // GO:0034364	extracellular region // high-density lipoprotein particle // extracellular region // high-density lipoprotein particle // extracellular region // high-density lipoprotein particle	inferred from electronic annotation // inferred from electronic annotation // inferred from electronic annotation // inferred from electronic annotation // inferred from electronic annotation // inferred from electronic annotation	GO:0001664 // GO:0005515 // GO:0001664 // GO:0005515 // GO:0001664 // GO:0005515	G-protein coupled receptor binding // protein binding // G-protein coupled receptor binding // protein binding // G-protein coupled receptor binding // protein binding	not recorded // inferred from physical interaction // not recorded // inferred from physical interaction // not recorded // inferred from physical interaction	---	---	Pfam	IPR000096	Serum amyloid A protein	main					7.90103	8.12004	7.77412	5.41588	5.55884	5.44942
TC0700004660.mm.1	Mvp	major vault protein // major vault protein // major vault protein // major vault protein // major vault protein // --- // ---	Coding	< 1e-07	< 1e-07	601.1	110.37	5.45	up	NM_080638 // ENSMUST00000165096 // ENSMUST00000133172 // uc009jtw.2 // BC006709 // OTTMUST00000061863 // OTTMUST00000061864	RefSeq // ENSEMBL // ENSEMBL // UCSC Genes // GenBank // Havana transcript // Havana transcript	Mus musculus major vault protein (Mvp), mRNA. // cdna:known chromosome:GRCm38:7:126986860:127014621:-1 gene:ENSMUSG00000030681 gene_biotype:protein_coding transcript_biotype:protein_coding // cdna:known chromosome:GRCm38:7:126998542:127011865:-1 gene:ENSMUSG00000030681 gene_biotype:protein_coding transcript_biotype:protein_coding // major vault protein // Mus musculus major vault protein, mRNA (c…	chr7	-	126986860	127014621	GO:0008283 // GO:0023057 // GO:0031953 // GO:0038127 // GO:0061099 // GO:0072376 // GO:0023057 // GO:0031953 // GO:0038127 // GO:0061099 // GO:0008283 // GO:0023057 // GO:0031953 // GO:0038127 // GO:0061099 // GO:0072376 // GO:0023057 // GO:0031953 // GO:0038127 // GO:0061099 // GO:0008283 // GO:0023057 // GO:0031953 // GO:0038127 // GO:0061099 // GO:0072376 // GO:0023057 // GO:0031953 // GO:0038…	cell proliferation // negative regulation of signaling // negative regulation of protein autophosphorylation // ERBB signaling pathway // negative regulation of protein tyrosine kinase activity // protein activation cascade // negative regulation of signaling // negative regulation of protein autophosphorylation // ERBB signaling pathway // negative regulation of protein tyrosine kinase activity …	inferred from mutant phenotype // not recorded // not recorded // not recorded // not recorded // inferred from mutant phenotype // inferred from electronic annotation // inferred from electronic annotation // inferred from electronic annotation // inferred from electronic annotation // inferred from mutant phenotype // not recorded // not recorded // not recorded // not recorded // inferred from…	GO:0005634 // GO:0005737 // GO:0005856 // GO:0030529 // GO:0048471 // GO:0070062 // GO:0005634 // GO:0005737 // GO:0005856 // GO:0048471 // GO:0070062 // GO:0005634 // GO:0005737 // GO:0005856 // GO:0030529 // GO:0048471 // GO:0070062 // GO:0005634 // GO:0005737 // GO:0043231 // GO:0070062 // GO:0005856 // GO:0048471 // GO:0005634 // GO:0005737 // GO:0005856 // GO:0030529 // GO:0048471 // GO:0070…	nucleus // cytoplasm // cytoskeleton // ribonucleoprotein complex // perinuclear region of cytoplasm // extracellular vesicular exosome // nucleus // cytoplasm // cytoskeleton // perinuclear region of cytoplasm // extracellular vesicular exosome // nucleus // cytoplasm // cytoskeleton // ribonucleoprotein complex // perinuclear region of cytoplasm // extracellular vesicular exosome // nucleus // …	not recorded // not recorded // not recorded // inferred from electronic annotation // not recorded // not recorded // inferred from electronic annotation // inferred from electronic annotation // inferred from electronic annotation // inferred from electronic annotation // inferred from electronic annotation // not recorded // not recorded // not recorded // inferred from electronic annotation /…	GO:0019901 // GO:0019903 // GO:0019901 // GO:0019903 // GO:0019901 // GO:0019903 // GO:0005515 // GO:0019901 // GO:0019903 // GO:0019901 // GO:0019903 // GO:0019901 // GO:0019903 // GO:0019901 // GO:0019903 // GO:0019901 // GO:0019903	protein kinase binding // protein phosphatase binding // protein kinase binding // protein phosphatase binding // protein kinase binding // protein phosphatase binding // protein binding // protein kinase binding // protein phosphatase binding // protein kinase binding // protein phosphatase binding // protein kinase binding // protein phosphatase binding // protein kinase binding // protein phos…	not recorded // not recorded // inferred from electronic annotation // inferred from electronic annotation // not recorded // not recorded // inferred from electronic annotation // inferred from electronic annotation // inferred from electronic annotation // not recorded // not recorded // inferred from electronic annotation // inferred from electronic annotation // not recorded // not recorded /…	---	---	Pfam // Pfam // Pfam	IPR002499 // IPR021870 // IPR002499	Major vault protein, N-terminal // Shoulder domain // Major vault protein, N-terminal	main	NONMMUT063700 412bp;		KnowTID_00006921 9263bp;		9.21683	9.24343	9.26633	6.82102	6.79904	6.78627
TC1700001465.mm.1	Unc93a	unc-93 homolog A (C. elegans) // unc-93 homolog A (C. elegans) // --- // unc-93 homolog A (C. elegans) (Unc93a), mRNA. // predicted gene 9992 // predicted gene 9992 // unc-93 homolog A (C. elegans)	Coding	< 1e-07	< 1e-07	255.42	47.24	5.41	up	NM_199252 // ENSMUST00000084966 // OTTMUST00000069555 // uc008amd.1 // BC139460 // BC151195 // uc008amc.1	RefSeq // ENSEMBL // Havana transcript // UCSC Genes // GenBank // GenBank // UCSC Genes	Mus musculus unc-93 homolog A (C. elegans) (Unc93a), mRNA. // cdna:known chromosome:GRCm38:17:13108617:13131791:-1 gene:ENSMUSG00000067049 gene_biotype:protein_coding transcript_biotype:protein_coding // unc-93 homolog A (C. elegans) // unc-93 homolog A (C. elegans) (Unc93a), mRNA. // Mus musculus predicted gene, ENSMUSG00000056133, mRNA (cDNA clone MGC:171087 IMAGE:8862482), complete cds. // Mus…	chr17	-	13108617	13131791	GO:0008150 // GO:0008150 // GO:0008150 // GO:0008150	biological_process // biological_process // biological_process // biological_process	no biological data available // no biological data available // no biological data available // no biological data available	GO:0005886 // GO:0016020 // GO:0016021 // GO:0005886 // GO:0005886 // GO:0016020 // GO:0016021 // GO:0005886 // GO:0005575 // GO:0005575	plasma membrane // membrane // integral to membrane // plasma membrane // plasma membrane // membrane // integral to membrane // plasma membrane // cellular_component // cellular_component	not recorded // inferred from electronic annotation // inferred from electronic annotation // inferred from electronic annotation // not recorded // inferred from electronic annotation // inferred from electronic annotation // inferred from electronic annotation // no biological data available // no biological data available	GO:0003674 // GO:0003674 // GO:0003674 // GO:0003674	molecular_function // molecular_function // molecular_function // molecular_function	no biological data available // no biological data available // no biological data available // no biological data available	---	---	Pfam	IPR010291	Ion channel regulatory protein, UNC-93	main		ENSMUST00000158775			7.98562	8.10291	7.93384	5.5746	5.64697	5.51206
TC0400004171.mm.1	Isg15	ISG15 ubiquitin-like modifier // ISG15 ubiquitin-like modifier // ISG15 ubiquitin-like modifier // ISG15 ubiquitin-like modifier // ISG15 ubiquitin-like modifier // ISG15 ubiquitin-like modifier	Coding	< 1e-07	< 1e-07	134.94	25.05	5.39	up	NM_015783 // ENSMUST00000085425 // uc012dri.1 // BC083156 // BC031424 // BC109346	RefSeq // ENSEMBL // UCSC Genes // GenBank // GenBank // GenBank	Mus musculus ISG15 ubiquitin-like modifier (Isg15), mRNA. // cdna:known chromosome:GRCm38:4:156199424:156200818:-1 gene:ENSMUSG00000035692 gene_biotype:protein_coding transcript_biotype:protein_coding // ISG15 ubiquitin-like modifier // Mus musculus ISG15 ubiquitin-like modifier, mRNA (cDNA clone MGC:103144 IMAGE:5338191), complete cds. // Mus musculus ISG15 ubiquitin-like modifier, mRNA (cDNA cl…	chr4	-	156199424	156200818	GO:0019941 // GO:0032020 // GO:0032020 // GO:0051607 // GO:0031397 // GO:0031397 // GO:0032020 // GO:0032649 // GO:0032649 // GO:0034340 // GO:0034340 // GO:0042742 // GO:0042742 // GO:0045071 // GO:0045071 // GO:0045648 // GO:0051607 // GO:0019941 // GO:0032020 // GO:0032020 // GO:0051607 // GO:0032020 // GO:0031397 // GO:0031397 // GO:0032649 // GO:0032649 // GO:0034340 // GO:0034340 // GO:0042…	modification-dependent protein catabolic process // ISG15-protein conjugation // ISG15-protein conjugation // defense response to virus // negative regulation of protein ubiquitination // negative regulation of protein ubiquitination // ISG15-protein conjugation // regulation of interferon-gamma production // regulation of interferon-gamma production // response to type I interferon // response t…	inferred from direct assay // inferred from direct assay // not recorded // inferred from electronic annotation // inferred from electronic annotation // inferred from sequence or structural similarity // inferred from electronic annotation // inferred from electronic annotation // inferred from sequence or structural similarity // inferred from electronic annotation // inferred from sequence or …	GO:0005576 // GO:0005737 // GO:0005576 // GO:0005576 // GO:0005737 // GO:0005576 // GO:0005576 // GO:0005737 // GO:0005576 // GO:0005576 // GO:0005737 // GO:0005576 // GO:0005576 // GO:0005737 // GO:0005576	extracellular region // cytoplasm // extracellular region // extracellular region // cytoplasm // extracellular region // extracellular region // cytoplasm // extracellular region // extracellular region // cytoplasm // extracellular region // extracellular region // cytoplasm // extracellular region	inferred from electronic annotation // inferred from electronic annotation // inferred from sequence or structural similarity // inferred from electronic annotation // inferred from electronic annotation // inferred from sequence or structural similarity // inferred from electronic annotation // inferred from electronic annotation // inferred from sequence or structural similarity // inferred fro…	GO:0005515 // GO:0031386 // GO:0005515 // GO:0031386 // GO:0005515 // GO:0031386 // GO:0005515 // GO:0031386 // GO:0005515 // GO:0031386	protein binding // protein tag // protein binding // protein tag // protein binding // protein tag // protein binding // protein tag // protein binding // protein tag	inferred from physical interaction // inferred from direct assay // inferred from physical interaction // inferred from direct assay // inferred from physical interaction // inferred from direct assay // inferred from physical interaction // inferred from direct assay // inferred from physical interaction // inferred from direct assay	---	---	Pfam // Pfam	IPR000626 // IPR022617	Ubiquitin // Small ubiquitin-related modifier, SUMO	main					6.99451	7.2654	7.00075	4.53842	4.82761	4.62213
TC1700001400.mm.1	Gm9992	predicted gene 9992 // predicted gene 9992 // predicted gene 9992 // predicted gene 9992	Coding	< 1e-07	< 1e-07	299.83	55.75	5.38	up	NM_001142539 // BC147830 // uc012ajn.1 // ENSMUST00000070059	RefSeq // GenBank // UCSC Genes // ENSEMBL	Mus musculus predicted gene 9992 (Gm9992), mRNA. // Mus musculus unc-93 homolog A (C. elegans), mRNA (cDNA clone MGC:182933 IMAGE:9087547), complete cds. // predicted gene 9992 // cdna:known chromosome:GRCm38:17:7363712:7385305:-1 gene:ENSMUSG00000056133 gene_biotype:protein_coding transcript_biotype:protein_coding	chr17	-	7363712	7385305	GO:0008150 // GO:0008150 // GO:0008150	biological_process // biological_process // biological_process	no biological data available // no biological data available // no biological data available	GO:0005575 // GO:0005575 // GO:0005575	cellular_component // cellular_component // cellular_component	no biological data available // no biological data available // no biological data available	GO:0003674 // GO:0003674 // GO:0003674	molecular_function // molecular_function // molecular_function	no biological data available // no biological data available // no biological data available	---	---	Pfam	IPR010291	Ion channel regulatory protein, UNC-93	main		ENSMUST00000178099			8.1921	8.33794	8.18618	5.83072	5.86864	5.7509
TC1200000225.mm.1	Cmpk2	cytidine monophosphate (UMP-CMP) kinase 2, mitochondrial // cytidine monophosphate (UMP-CMP) kinase 2, mitochondrial // cytidine monophosphate (UMP-CMP) kinase 2, mitochondrial // cytidine monophosphate (UMP-CMP) kinase 2, mitochondrial // cytidine monophosphate (UMP-CMP) kinase 2, mitochondrial	Coding	< 1e-07	< 1e-07	1268.16	237.38	5.34	up	NM_020557 // ENSMUST00000020969 // uc007nfj.1 // BC027329 // BC057565	RefSeq // ENSEMBL // UCSC Genes // GenBank // GenBank	Mus musculus cytidine monophosphate (UMP-CMP) kinase 2, mitochondrial (Cmpk2), nuclear gene encoding mitochondrial protein, mRNA. // cdna:known chromosome:GRCm38:12:26469204:26479835:1 gene:ENSMUSG00000020638 gene_biotype:protein_coding transcript_biotype:protein_coding // cytidine monophosphate (UMP-CMP) kinase 2, mitochondrial // Mus musculus cytidine monophosphate (UMP-CMP) kinase 2, mitochond…	chr12	+	26469204	26479837	GO:0006221 // GO:0006227 // GO:0006233 // GO:0016310 // GO:0046939 // GO:0071222 // GO:0006165 // GO:0006233 // GO:0009142 // GO:0006221 // GO:0006227 // GO:0006233 // GO:0016310 // GO:0046939 // GO:0071222 // GO:0006227 // GO:0006233 // GO:0006165 // GO:0009142 // GO:0006221 // GO:0006227 // GO:0006233 // GO:0016310 // GO:0046939 // GO:0071222 // GO:0006165 // GO:0006233 // GO:0009142 // GO:0006…	pyrimidine nucleotide biosynthetic process // dUDP biosynthetic process // dTDP biosynthetic process // phosphorylation // nucleotide phosphorylation // cellular response to lipopolysaccharide // nucleoside diphosphate phosphorylation // dTDP biosynthetic process // nucleoside triphosphate biosynthetic process // pyrimidine nucleotide biosynthetic process // dUDP biosynthetic process // dTDP bios…	inferred from electronic annotation // not recorded // not recorded // inferred from electronic annotation // not recorded // inferred from direct assay // inferred from sequence or structural similarity // inferred from electronic annotation // inferred from sequence or structural similarity // inferred from electronic annotation // not recorded // not recorded // inferred from electronic annota…	GO:0005634 // GO:0005739 // GO:0005634 // GO:0005739 // GO:0005739 // GO:0005634 // GO:0005739 // GO:0005739 // GO:0005739 // GO:0005634 // GO:0005634 // GO:0005739 // GO:0005634 // GO:0005739 // GO:0005739 // GO:0005634 // GO:0005739 // GO:0005634 // GO:0005739 // GO:0005739	nucleus // mitochondrion // nucleus // mitochondrion // mitochondrion // nucleus // mitochondrion // mitochondrion // mitochondrion // nucleus // nucleus // mitochondrion // nucleus // mitochondrion // mitochondrion // nucleus // mitochondrion // nucleus // mitochondrion // mitochondrion	not recorded // not recorded // inferred from electronic annotation // inferred from electronic annotation // --- // not recorded // not recorded // --- // inferred from electronic annotation // inferred from electronic annotation // not recorded // not recorded // inferred from electronic annotation // inferred from electronic annotation // --- // not recorded // not recorded // inferred from el…	GO:0000166 // GO:0004127 // GO:0004798 // GO:0005524 // GO:0009041 // GO:0016301 // GO:0016740 // GO:0033862 // GO:0004127 // GO:0004127 // GO:0004550 // GO:0004798 // GO:0033862 // GO:0033862 // GO:0000166 // GO:0004127 // GO:0004798 // GO:0005524 // GO:0009041 // GO:0016301 // GO:0016740 // GO:0033862 // GO:0004127 // GO:0004127 // GO:0004798 // GO:0009041 // GO:0033862 // GO:0033862 // GO:0004…	nucleotide binding // cytidylate kinase activity // thymidylate kinase activity // ATP binding // uridylate kinase activity // kinase activity // transferase activity // UMP kinase activity // cytidylate kinase activity // cytidylate kinase activity // nucleoside diphosphate kinase activity // thymidylate kinase activity // UMP kinase activity // UMP kinase activity // nucleotide binding // cytid…	inferred from electronic annotation // not recorded // not recorded // inferred from electronic annotation // not recorded // inferred from electronic annotation // inferred from electronic annotation // not recorded // inferred from electronic annotation // --- // inferred from sequence or structural similarity // inferred from electronic annotation // inferred from electronic annotation // --- …	---	---	---	---	---	main					10.3526	10.4025	10.2026	8.03546	7.82997	7.85534
[truncated: 2,099 more rows]

## Sheet: Sheet1
ProbeSet	lncRNA	Description	type	P-value	FDR	Geom mean of intensities in class Chu	Geom mean of intensities in class C	Fold-change（Chu/C)	style	lncRNA Accession	lncRNA Source	lncRna - Description	Chromosome	Strand	Start	Stop	GO Biological Process ID	GO Biological Process Term	GO Biological Process Evidence	GO Cellular Component ID	GO Cellular Component Term	GO Cellular Component Evidence	GO Molecular Function ID	GO Molecular Function Term	GO Molecular Function Evidence	Pathway Source	Pathway Name	Protein Domains - Source	Protein Domains - Accession or domain name	Protein Domains - Description	category	up stream.10kb	overlap	down stream.10kb	antisense	CHU1_(MTA-1_0).rma-gene-full-Signal	CHU2_(MTA-1_0).rma-gene-full-Signal	CHU3_(MTA-1_0).rma-gene-full-Signal	C1_(MTA-1_0).rma-gene-full-Signal	C2_(MTA-1_0).rma-gene-full-Signal	C3_(MTA-1_0).rma-gene-full-Signal
[truncated: 5 more rows]

[truncated: 3 more sheets: 差异lncRNA, Gene-list, lncRNA-list]
